# Supplementary material
Source: PubMed Central journal article supplement (PMC7263833)
Supplement: NIHMS1590454-supplement-Supplement1.pdf [file NIHMS1590454-supplement-Supplement1.pdf]

## Supplementary Appendix

This appendix has been provided by the authors to give readers additional information about their work.

Supplement to: Maron DJ, Hochman JS, Reynolds HR, et al. Initial invasive or conservative strategy for stable coronary disease. *N Engl J Med* 2020;382:1395-407. DOI: [10.1056/NEJMoa1915922](https://doi.org/10.1056/NEJMoa1915922)

# Supplementary Appendix

This appendix has been provided by the authors to give readers additional information about their work.

## Table of Contents

### Contents

|                                                                                                   |    |
|---------------------------------------------------------------------------------------------------|----|
| I. ISCHEMIA Committee, CCC, Trial-Related Personnel .....                                         | 3  |
| II. Site Personnel .....                                                                          | 15 |
| III. Supplementary Methods .....                                                                  | 54 |
| <b>Required Quality Metrics for Participating Sites</b> .....                                     | 54 |
| <b>Guidelines for Sites on How to Achieve Revascularization of All Ischemic Territories</b> ..... | 55 |
| <b>Definitions of Outcomes</b> .....                                                              | 59 |
| <b>Death</b> .....                                                                                | 59 |
| <b>Myocardial Infarction</b> .....                                                                | 59 |
| <b>Hospitalization for Unstable Angina</b> .....                                                  | 64 |
| <b>Resuscitated Cardiac Arrest</b> .....                                                          | 64 |
| <b>Hospitalization for Heart Failure</b> .....                                                    | 64 |
| <b>Stroke</b> .....                                                                               | 66 |
| <b>SUPPLEMENTARY STATISTICAL METHODS</b> .....                                                    | 68 |
| <b>BAYESIAN COMPETING RISKS NON-PROPORTIONAL HAZARDS SURVIVAL ANALYSIS</b> .....                  | 70 |
| IV. Supplementary Figures.....                                                                    | 74 |
| <b>Figure S1. Study Flow</b> .....                                                                | 74 |
| <b>Figure S2. Cross-Sectional Screening Data</b> .....                                            | 75 |
| <b>Figure S3a. Fractional Flow Reserve Algorithm After Stress Imaging</b> .....                   | 76 |
| <b>Figure S3b. Fractional Flow Reserve Algorithm After Non-Imaging Exercise Stress Test</b> ..... | 76 |
| <b>Figure S4. Medication Use During the Trial</b> .....                                           | 78 |
| <b>Figure S5. Dual Antiplatelet Therapy After PCI in Invasive Strategy Participants</b> .....     | 80 |
| <b>Figure S6a. Cumulative Incidence Plot of Cardiac Catheterization by Treatment Group</b> .....  | 81 |
| <b>Figure S6b. Cumulative Incidence Plot of Revascularization by Treatment Group</b> .....        | 82 |
| <b>Figure S7. Estimated Instantaneous Hazard Rates</b> .....                                      | 83 |

|                                                                                                                                                                                                                       |     |
|-----------------------------------------------------------------------------------------------------------------------------------------------------------------------------------------------------------------------|-----|
| Figure S8. Rates of the Primary Outcome Components and Other Outcomes.....                                                                                                                                            | 85  |
| Figure S9. Time-to-Event Curves for the Primary Composite Outcome Using the Secondary Definition of MI .....                                                                                                          | 98  |
| Figures S10a-10i. Posterior Distribution of Difference in Cumulative Event Rate at 1, 3, and 5 Years .....                                                                                                            | 99  |
| V. Supplementary Tables.....                                                                                                                                                                                          | 100 |
| Table S1. Participant Eligibility Criteria .....                                                                                                                                                                      | 100 |
| Table S2. Ischemia Eligibility Criteria by Stress Test Modality .....                                                                                                                                                 | 102 |
| Table S3. Guideline-Based Medical Therapy Goals .....                                                                                                                                                                 | 103 |
| Table S4. Industry Support .....                                                                                                                                                                                      | 106 |
| Table S5. Baseline Stress Test and Coronary CT Angiography Results .....                                                                                                                                              | 107 |
| Table S6. Baseline and On-Trial Physiologic Measurements, Risk Factors, and Medications by Treatment Group .....                                                                                                      | 108 |
| Table S7a. Frequency and Timing of the First Catheterization and Revascularization for Participants Randomized to the INV Treatment <sup>1</sup> Intent-to-Treat Population .....                                     | 110 |
| Table S7b. Unadjusted Cumulative Incidence Function Estimates (Accounting for Competing Risk of Death) of First Cardiac Catheterization for Conservative Strategy Participants by Indications for the Procedure ..... | 111 |
| Table S7c. Unadjusted Cumulative Incidence Function Estimates (Accounting for Competing Risk of Death) of First Revascularization for Conservative Strategy Participants by Indications for the Procedure .....       | 112 |
| Table S8. Angiographic Characteristics and Procedural Data for First Procedure .....                                                                                                                                  | 113 |
| Table S9. Total Number of Catheterization and Revascularization Procedures by Treatment Group.....                                                                                                                    | 115 |
| Table S10. Outcomes by Treatment Group Using the Primary Definition of MI .....                                                                                                                                       | 116 |
| Table S11. Outcomes by Treatment Group Using the Secondary Definition of MI .....                                                                                                                                     | 119 |
| Tables S12a-S12f. Bayesian Probability Tables .....                                                                                                                                                                   | 121 |
| PRIMARY OUTCOME .....                                                                                                                                                                                                 | 121 |
| CV DEATH OR MI.....                                                                                                                                                                                                   | 122 |
| ALL-CAUSE DEATH.....                                                                                                                                                                                                  | 123 |

## **I. ISCHEMIA Committee, CCC, Trial-Related Personnel**

### **Past and Current Committee Members**

#### **Leadership Committee**

Judith S. Hochman (Chair)  
David J. Maron (Co-Chair)  
William Boden (Co-Principal Investigator)  
Bruce Ferguson (Co-Principal Investigator)  
Robert Harrington (Co-Principal Investigator)  
Gregg W. Stone (Co-Principal Investigator)  
David Williams (Co-Principal Investigator)

#### **Executive Committee**

Judith S. Hochman (Chair)  
David J. Maron (Co-Chair)  
Karen P. Alexander  
Sripal Bangalore  
Jeffrey Berger  
William Boden  
Robert Harrington  
Daniel Mark  
Sean M. O'Brien  
Harmony R. Reynolds  
Yves Rosenberg  
Leslee J. Shaw  
John Spertus  
Gregg W. Stone

#### **Steering Committee**

Judith S. Hochman (Chair)  
David J. Maron (Co-Chair)  
*Members of Executive Committee*  
Christie Ballantyne\*  
Daniel Berman  
Rafael Beyar\*  
Balram Bhargava  
Chris Buller\*  
Antonio (Tony) Carvalho\*\*  
Bernard R. Chaitman  
Rafael Diaz\*  
Rolf Doerr  
Vladimir Dzavik  
Bruce Ferguson  
Shaun Goodman  
Gilbert Gosselin

Rory Hachamovitch\*  
Christian Hamm\*  
Claes Held  
Malte Helm\*  
Kurt Huber\*  
Lixin Jiang  
Matyas Keltai  
Shun Kohsaka  
Irene Lang\*  
Renato Lopes  
Jose Lopez-Sendon  
Aldo Maggioni  
John Mancini  
C. Noel Bairey Merz  
James Min  
Eric Peterson\*  
Michael H. Picard  
Witold Ruzyllo  
Joseph Selvanayagam  
Roxy Senior  
Tali Sharir  
Gabriel Steg  
Hanna Szwed  
Frans Van de Werf\*  
William Weintraub  
Harvey White  
David Williams

**Optimal Medical Therapy Committee**

William Boden (Co-Chair)  
David J. Maron (Co-Chair)  
Christie Ballantyne  
Sripal Bangalore  
Karen Calfas \*\*  
Bernard R. Chaitman  
Mary Ann Champagne  
Michael Davidson  
Jerome Fleg  
Peter A. McCullough  
Jonathan Newman  
Peter Stone

**Optimal Revascularization Therapy Planning Committee**

Gregg W. Stone (Chair)

**Subcommittee: CABG**

Bruce Ferguson (Co-Chair)  
Philippe Menasche (Co-Chair)  
Sripal Bangalore  
Michael Davidson\*\*  
Stephen Fremes  
Robert Guyton  
Michael Mack  
Fred Mohr  
Anupama Rao  
Joe Sabik  
Oz Shapira  
David Taggart  
James Tatoulis

**Subcommittee: PCI**

David Williams (Co-Chair)  
Sripal Bangalore  
Jim Blankenship  
Sorin Brener  
Chris Buller  
Antonio Colombo  
Bernard de Bruyne  
Philippe G n reux  
Robert Harrington  
Dean Kereiakes  
Thierry Lefevre  
Jeffrey Moses

**Clinical Events**

**Endpoint Definition Panel**

Bernard R. Chaitman (Chair)  
Karen P. Alexander  
Judith S. Hochman  
Ken Mahaffey  
David J. Maron  
Gregg W. Stone  
Harvey White

**Clinical Event Review Committee**

Bernard R. Chaitman (Chair)  
Salvador Cruz-Flores  
Nicholas Danchin  
Eli Feen  
Mario J. Garcia

Paul Hauptman  
Abhay A. Laddu  
Eugene Passamani  
Ileana L. Pina  
Maarten Simoons  
Hicham Skali  
Kristian Thygesen  
David Waters

**CEC Administrative Group**

Karen P. Alexander  
Patricia Endsley\*  
Gerard Esposito  
Jeffrey Kanters  
John Pownall  
Dimitrios Stournaras

**ISCHEMIA Imaging Committee**

Leslee J. Shaw (Chair)  
Daniel Berman  
Matthias Friedrich  
Rory Hachamovitch  
Raymond Kwong  
John Mancini  
James Min  
Dana Oliver  
Michael H. Picard  
Harmony R. Reynolds

**Biostatistics Planning Committee**

Frank Harrell (Chair)  
Jeffrey Blume  
Kerry Lee  
Sean M. O'Brien

**BioRepository Committee**

Jeffrey Berger (Chair)  
Claes Held  
Iftikhar Kullo  
Bruce McManus  
Kristin Newby

**EQOL Committee**

Daniel Mark (Co-Chair)  
John Spertus (Co-Chair)

David Cohen  
William Weintraub

**Recruitment for Women & Minorities**

C. Noel Bairey Merz (Chair)  
Raffaele Bugiardini  
Jelena Celutkiene  
Jorge Escobedo  
Angela Hoye  
Radmila Lyubarova  
Deirdre Mattina  
Jesus Peteiro  
Harmony R. Reynolds  
Paola Smanio

**Publications**

David J. Maron (Chair)  
Karen P. Alexander  
Sripal Bangalore  
Jeffrey Berger  
William Boden  
Robert Harrington  
Judith S. Hochman  
Sean M. O'Brien  
Harmony R. Reynolds  
Yves Rosenberg  
Gregg W. Stone

**Publication Subcommittees**

**Economics**

Daniel Mark (Chair)  
John Spertus

**QOL**

John Spertus (Chair)  
Daniel Mark

**Stress Testing**

Leslee J. Shaw (Chair)  
Dan Berman  
Bernard R. Chaitman  
Jerome Fleg  
Raymond Kwong  
Michael H. Picard  
Harmony R. Reynolds  
Roxy Senior

**CCTA**



James Min (Chair)

Jonathan Leipsic

John Mancini

**Angiography/Optimal Revascularization Therapy**

Gregg W. Stone (Chair)

Ziad Ali (Co-chair)

Sripal Bangalore

T. Bruce Ferguson

David Williams

(Philippe Genereux, former Chair, Angiography Subcommittee)\*

**Optimal Medical Therapy**

William Boden (Co-Chair)

David J. Maron (Co-Chair)

Jerome Fleg

Jonathan Newman

**Biorepository**

Jeffrey Berger (Chair)

**CEC**

Bernard R. Chaitman (Chair)

Karen P. Alexander

**CKD**

Sripal Bangalore (Chair)

Karen P. Alexander

Jerome Fleg

Judith S. Hochman

David J. Maron

Roy Mathew

Sean M. O'Brien

Harmony R. Reynolds

Mandeep Sidhu

**CIAO**

Harmony R. Reynolds (Chair)

**DSMB Members**

Lawrence Friedman (Chair)

Jeffrey Anderson

Jessica Berg \*

David DeMets

C. Michael Gibson

Gervasio Lamas

Nicole Deming

Jonathan Himmelfarb

Pamela Ouyang

Pamela Woodard

**Independent Statistical Analysis Center for DSMB Reporting**

Frank Harrell  
Samuel Nwosu

**NHLBI Program Staff**

**Project Office**

Yves Rosenberg (Project Officer)

Jerome Fleg

Ruth Kirby

**Statisticians**

Neal Jeffries

**ISCHEMIA Clinical Coordinating Center (CCC)**

**Study Leadership**

Judith S. Hochman (Study Chair, Director of CCC)

David J. Maron (Study Co-Chair, Co-Director of CCC, US Country Leader)

**CCC Faculty**

Sripal Bangalore (Optimal Revascularization Therapy CCC Director, Regional Leader)

Jeffrey Berger (Director of the Biorepository, Regional Leader)

William Boden (US-VA Regional Leader)

Jonathan Newman (Optimal Medical Therapy CCC Director, Regional Leader)

Harmony R. Reynolds (Associate Director of CCC, CCC Imaging Lead, Regional Leader)

Mandeep Sidhu (US-VA Regional Co-Leader)

***Program Directors***

Jean E. Denaro\*\*

Stephanie Mavromichalis

***Project Managers***

Kevin Chan

Gia Cobb\*

Aira Contreras

Diana Cukali\*

Stephanie Ferket\*

Andre Gabriel\*

Antonietta Hansen\*

Arline Roberts

***Clinical Research Associates***

Michelle Chang

Sharder Islam\*

Graceanne Wayser\*

Solomon Yakubov\*

Michelle Yee

***Clinical Trial Assistants***

Caroline Callison

Isabelle Hogan

Albertina Qelaj\*

Charlotte Pirro\*

Kerrie Van Loo

Brianna Wisniewski\*

***Grants and Finance Administration***

Margaret Gilsonan (Grants Manager)

Bevin Lang

Samaa Mohamed

***Publications Team***

Jihyun Lyo (Publications Manager)

Nadia Gakou

***Data Analyst***

Vincent Setang\*

Mark Xavier\*

**Statistical and Data Coordinating Center (SDCC)**

Sean M. O'Brien (Principal Investigator)

Karen P. Alexander (Co-Principal Investigator)

Akshay Bagai\*

Samuel Broderick

Michelle Crowder

Derek Cyr

Patricia Endsley

Jyotsna Garg

Xiangqiong Gu

Robert

Harrington\*

Lisa Hatch

Anne Heath\*

Zhen Huang

Jeffrey Kanters

Kerry Lee\*

Jeff Leimberger

Jill Marcus

Courtney Page

Wanda Parker\*

Wayne Pennachi

John Pownall

Frank Rockhold

Susanna Stevens

Allegra Stone

Dimitrios  
Stournaras  
Omar Thompson  
Sheri Ussery  
Jennifer White\*  
Mary (Kaye)  
Williams  
Weibing Xing  
Songlin Zhu

**Economics and Quality of Life Coordinating Center (EQOL CC)**

*Duke Clinical Research Institute, Durham, NC*

Daniel B. Mark (Principal Investigator)  
Kevin Anstrom  
Khaula Baloch  
Janet Blount  
Patricia Cowper  
Linda Davidson-Ray  
Laura Drew  
Tina Harding  
J David Knight  
Diane Minshall Liu  
Betsy O'Neal  
Thomas Redick

*Saint Luke's Mid America Heart Institute, Kansas City, MO*

John Spertus (Principal Investigator)  
Philip Jones  
Karen Nugent  
Grace Jingyan Wang

**ISCHEMIA Imaging Coordinating Center (ICC)**

Leslee J. Shaw (Principal Investigator)  
Lawrence Phillips  
Abhinav Goyal  
Holly Hetrick  
Dana Oliver

*Nuclear Core Lab*

Daniel Berman (Director)  
Sean W. Hayes (Co-Director)  
John D. Friedman  
R. James Gerlach  
Mark Hyun  
Romalisa Miranda-Peats

Piotr Slomka

Louise Thomson

CMR Core Lab

Raymond Y. Kwong (Director)

Matthias Friedrich (Director)\*

Francois Pierre Mongeon (Co-Director)

Steven Michael

Echo Core Lab

Michael H. Picard (Director)

Judy Hung

Marielle Scherrer-Crosbie

Xin Zeng

**ECG/ETT CoreLab**

Bernard R. Chaitman (Director)

Jane Eckstein

Bandula Guruge

Mary Streif

**Angiographic Core Lab**

Ziad Ali (Director)

Philippe Genereux (Director)\*

Maria A. Alfonso

Maria P. Corral

Javier J. Garcia

Jennifer Horst

Ivana Jankovic

Maayan Konigstein

Mitchel B. Lustre\*

Yolayfi Peralta

Raquel Sanchez

**CCTA Core Lab**

James Min (Director)

Reza Arsanjani

Matthew Budoff

Kimberly Elmore

Millie Gomez

Cameron Hague

Niree Hindoyan

Jonathan Leipsic

GB John Mancini

Rine Nakanishi

M. Barbara Srichai-Parsia

Eunice Yeoh  
Tricia Youn

### **Academic Research Organizations (AROs)**

#### **Associazione Nazionale Medici Cardiologi Ospedalieri (ANMCO) -Italy & Switzerland**

Aldo P. Maggioni (Country Leader)  
Francesca Bianchini  
Martina Ceseri  
Andrea Lorimer  
Marco Magnoni  
Francesco Orso  
Laura Sarti  
Martinia Tricoli\*

#### **Brazilian Clinical Research Institute (BCRI) - Brazil**

Antonio Carvalho (Country Leader)\*\*  
Renato Lopes (Country Leader)  
Lilian Mazza Barbosa  
Tauane Bello Duarte  
Tamara Colaiácovo Soares  
Julia de Aveiro Morata  
Pedro Carvalho  
Natalia de Carvalho Maffei  
Flávia Egydio\*  
Anelise Kawakami\*  
Janaina Oliveira\*  
Elissa Restelli Piloto\*  
Jaqueline Pozzibon\*

#### **Canadian Heart Research Centre (CHRC) - Canada**

Shaun Goodman (Country Leader)  
Diane Camara  
Neamat Mowafy  
Caroline Spindler

#### **China Oxford Centre for International Health Research - China**

Lixin Jiang (Country Leader)  
Hao Dai  
Fang Feng  
Jia Li  
Li Li\*  
Jiamin Liu  
Qiulan Xie  
Haibo Zhang  
Jianxin Zhang  
Lihua Zhang  
Liping Zhang

Ning Zhang

Hui Zhong

Estudios Clínicos Latino America (ECLA) - Argentina

Rafael Diaz\*

Claudia Escobar

Maria Eugenia Martin\*

Andrea Pascual\*

Foundation for Biomedical Research of La Paz University Hospital (FIBHULP) - Spain

José Lopez-Sendon (Country Leader)

Paloma Moraga

Victoria Hernandez

Almudena Castro

Maria Posada\*

Sara Fernandez

José Luis Narro Villanueva

Rafael Selgas

French Alliance for Cardiovascular Trials (FACT) - France

Gabriel Steg (Country Leader)

Helene Abergel

Jean Michel Juliard

Green Lane Coordinating Centre Ltd. (GLCC) -Malaysia, New Zealand, Singapore, Taiwan, Thailand

Harvey White (Country Leader)

Caroline Alswailer

KU Leuven Research & Development - Belgium\*

Frans Van de Werf (Country Leader)

Kathleen Claes

Kaatje Goetschalckx

Ann Luyten

Valerie Robesyn

South Australian Health and Medical Research Institute Ltd (SAHMRI) - Australia

Joseph B. Selvanayagam (Country Leader)

Deirdre Murphy

### **Contract Research Organizations (CROs) for ISCHEMIA Trial**

FOCUS Clinical Research Center d.o.o. Belgrade - Serbia

Nevena Garcevic

Jelena Stojkovic

iProcess Global Research Inc. - India

Asker Ahmed

Richa Bhatt

Nitika Chadha\*

Vijay Kumar\*

Sadath Lubna\*

Pushpa Naik

Shruti Pandey\*  
 Karthik Ramasamy\*  
 Mohammed Saleem  
 Pratiksha Sharma  
 Hemalata Siddaram\*

*\*past members / past organizations*

*\*\*deceased*

**II. Site Personnel**

| Country<br>(No. Randomizations) | Investigator(s)                                                                                                                                                                  | Study Coordinator(s)                                                                        | City & State<br>(if applicable) | Institution (No.<br>Randomizations)                           |
|---------------------------------|----------------------------------------------------------------------------------------------------------------------------------------------------------------------------------|---------------------------------------------------------------------------------------------|---------------------------------|---------------------------------------------------------------|
| *United States (853)            |                                                                                                                                                                                  |                                                                                             |                                 |                                                               |
| Country Leader                  |                                                                                                                                                                                  |                                                                                             |                                 |                                                               |
| David J. Maron, MD              |                                                                                                                                                                                  |                                                                                             |                                 |                                                               |
| Regional Leader for<br>VA Sites |                                                                                                                                                                                  |                                                                                             |                                 |                                                               |
| William E. Boden, MD            |                                                                                                                                                                                  |                                                                                             |                                 |                                                               |
|                                 | Kreton Mavromatis,<br>MD<br>Jason Linefsky, MD                                                                                                                                   | John Doan, MD<br><br>Raven Lee, CCRP<br>Risha Patel<br>So Yang Cho                          | Decatur, GA                     | Atlanta VA Medical<br>Center (139)                            |
|                                 | Todd Miller, MD                                                                                                                                                                  | Susan Milbrandt<br>Dawn Shelstad                                                            | Rochester,<br>MN                | Mayo Clinic (50)                                              |
|                                 | Subhash Banerjee,<br>MD                                                                                                                                                          | Preeti Kamath, BDS,<br>MHA, CCRP<br>Ishita Tejani, BDS,<br>MS, MSPH<br>Stanley E. Cobos, BA | Dallas, TX                      | V.A. North Texas<br>Health Care System<br>(35)                |
|                                 | Harmony R.<br>Reynolds, MD<br>Jonathan D.<br>Newman, MD, MPH<br>Sripal Bangalore,<br>MD<br>Robert M. Donnino,<br>MD<br>Lawrence M.<br>Phillips, MD<br>Muhammed Saric,<br>MD, PhD | Kirsten J. Quiles, MS<br><br>Raven R. Dwyer, MPH<br><br>Dalisa Espinosa, MBS                | New York, NY                    | NYU Langone<br>Medical Center-<br>Bellevue Hospital<br>(26)   |
|                                 | Khaled Abdul-Nour,<br>MD                                                                                                                                                         | Allison Schley, BS<br>Heather Golden<br>Hermine Osseni, MS<br>Charlene Wiyarand             | Detroit, MI                     | Henry Ford Health<br>System (21)                              |
|                                 | Peter H. Stone, MD                                                                                                                                                               | Peter Douglass, BA<br>Hayley Pomeroy, BA<br>Alexandra Craft, BA                             | Boston, MA                      | Brigham & Women's<br>Hospital, Harvard<br>Medical School (21) |



|                                                                                                                                                                                                                                                                                                                                                                                   |                                                                                                   |                                  |                                                                                                                |
|-----------------------------------------------------------------------------------------------------------------------------------------------------------------------------------------------------------------------------------------------------------------------------------------------------------------------------------------------------------------------------------|---------------------------------------------------------------------------------------------------|----------------------------------|----------------------------------------------------------------------------------------------------------------|
| James J. Jang, MD<br>Gennie Yee, MD                                                                                                                                                                                                                                                                                                                                               | Bethany Harvey, BA<br>Olivia Anaya<br>Phoebe Goad, RN<br>Steven Giovannone                        | San Jose, CA                     | Kaiser Permanente<br>San Jose (18)                                                                             |
| Steven Weitz, MD                                                                                                                                                                                                                                                                                                                                                                  | Lori Pritchard, RN                                                                                | Schenectady,<br>NY               | Cardiology<br>Associates of<br>Schenectady P.C.<br>(17)                                                        |
| Suzanne Arnold,<br>MD<br>James Henry<br>O'Keefe, Jr, MD (PI<br>from 2012-2016)                                                                                                                                                                                                                                                                                                    | Rosann Gans, RN<br>Paul Kennedy, RN                                                               | Kansas City,<br>MO               | Saint Luke's Hospital<br>(17)                                                                                  |
| Michael D. Shapiro,<br>DO                                                                                                                                                                                                                                                                                                                                                         | Shobana Ganesan,<br>PhD<br>David Schlichting,<br>LPN<br>Aynun Naher                               | Portland, OR                     | Oregon Health &<br>Science University<br>(17)                                                                  |
| Mohammad El-<br>Hajjar, MD<br>Mandeep S. Sidhu,<br>MD, MBA<br>Steven A. Fein, MD<br>Mikhail T. Torosoff,<br>MD, PhD<br>Radmila Lyubarova,<br>MD<br>Sulagna<br>Mookherjee, MD<br>Krzysztof<br>Drzymalski, MD<br>Edward O. McFalls,<br>MD, PhD<br>Santiago A. Garcia,<br>MD<br>Stefan C. Bertog,<br>MD<br>Rizwan A. Siddiqui,<br>MD<br>Areef Ishani, MD<br>Ronnell A. Hansen,<br>MD | Wendy L. Stewart, MS<br>Kristin M. Salmi, BS                                                      | Albany, NY                       | Albany Medical<br>Center Hospital (16)                                                                         |
| Michel Georges<br>Khouri, MD                                                                                                                                                                                                                                                                                                                                                      | Debra K. Johnson, RN<br>Rebekah R.<br>Herrmann, RN                                                | Minneapolis,<br>MN               | Minneapolis VAMC<br>(15)                                                                                       |
| Jonathan L.<br>Goldberg, MS, MD                                                                                                                                                                                                                                                                                                                                                   | Kristine Arges<br>Melissa LeFevre<br>Jennifer Tomfohr<br>Kimberly Ann Byrne<br>Taissa Zappernick  | Durham, NC<br>Cleveland, OH      | Duke University<br>Medical Center (15)<br>Louis Stokes<br>Cleveland Veterans<br>Affairs Medical<br>Center (14) |
| Richard Goldweit,<br>MD                                                                                                                                                                                                                                                                                                                                                           | Sallie Canada<br>Meghana Kakade<br>Patricia Mieses<br>Stanley E. Cobos, BA<br>Raven R. Dwyer, MPH | Englewood,<br>NJ<br>Brooklyn, NY | Englewood Hospital<br>and Medical Center<br>(13)<br>NYU-HHC Woodhull<br>Hospital (12)                          |

|                                                                                                                                                                                              |                                                                                                                                                          |                                  |                                                                       |
|----------------------------------------------------------------------------------------------------------------------------------------------------------------------------------------------|----------------------------------------------------------------------------------------------------------------------------------------------------------|----------------------------------|-----------------------------------------------------------------------|
| Ronny A. Cohen, MD<br>Brooks Mirrer, MD<br>Victor Navarro, MD                                                                                                                                | Dalisa Espinosa, MBS<br>Kirsten J. Quiles, MS<br>Magdalena Rantinella, BS<br>Jessica Rodriguez, BS<br>Olivia Mancilla, BS                                |                                  |                                                                       |
| David E. Winchester, MD, MS<br>Marvin Kronenberg, MD<br>Philip Rogal, MD<br>Christopher McFarren, MD                                                                                         | Susan Stinson, RN<br>Terry Weyand<br>Sherron C. Crook                                                                                                    | Gainesville, FL<br>Nashville, TN | Malcom Randall VAMC (11)<br>Vanderbilt University Medical Center (11) |
| John F. Heitner, MD                                                                                                                                                                          | Jean Ho<br>Saadat Khan<br>Mahmoud Mohamed<br>Mary R. Soltau, RN<br>Delsa K. Rose, RN                                                                     | Brooklyn, NY                     | New York - Presbyterian/Brooklyn Methodist Hospital (10)              |
| Ira M. Dauber, MD                                                                                                                                                                            | Rebecca J. Wimmer, RN<br>Kathy E. Siegel, RN<br>Susan Derbyshire                                                                                         | Littleton, CO                    | South Denver Cardiology Associates, P.C. (10)                         |
| Charles Cannan, MD                                                                                                                                                                           | Michelle Dixon<br>Gerald Leonard<br>Ciarra Heard, LVN                                                                                                    | Portland, OR                     | Providence Heart and Vascular Institute (10)                          |
| Sriram Sudarshan, MD                                                                                                                                                                         | Viviana Gabriel, LVN<br>Sukie Desire                                                                                                                     | Wichita Falls, TX                | Wichita Falls Heart Clinic (9)                                        |
| Puja K. Mehta, MD<br>Michael McDaniel, MD<br>Stamatios Lerakis, MD<br>Arshed Quyyumi, MD<br>Nanette K. Wenger, MD<br>Chester M. Hedgepeth, MD, PhD<br>Heather Hurlburt, MD<br>Alan Rosen, MD | Fauzia Rashid, PhD<br>Senait Asier<br>Keyur Patel<br>Jennifer Gillis, APRN<br>Megan Manocchia, RN<br>Susan Moore, RN<br>Elizabeth Congdon<br>Gail Brandt | Atlanta, GA<br>Warwick, RI       | Emory University (9)<br>Kent Hospital (9)                             |
| Zakir Sahul, MD                                                                                                                                                                              | Nora Marchelletta<br>Kristina Wippler                                                                                                                    | Ypsilanti, MI                    | Michigan Heart, PC (9)                                                |
| David Booth, MD<br>Steve Leung, MD                                                                                                                                                           | Yvonne Taul, RN<br>Jennifer Isaacs, MS                                                                                                                   | Lexington, KY                    | University of Kentucky (8)                                            |

|                                                                                                                                                                                                                     |                                                                                                                              |                               |                                                                                                         |
|---------------------------------------------------------------------------------------------------------------------------------------------------------------------------------------------------------------------|------------------------------------------------------------------------------------------------------------------------------|-------------------------------|---------------------------------------------------------------------------------------------------------|
| Ahmed Abdel-Latif,<br>MD, PhD<br>Hassan Reda, MD<br>Khaled Ziada, MD                                                                                                                                                | Viktoria Bulkley, RN<br><br>Caroline Rodgers                                                                                 |                               |                                                                                                         |
| Sampoornima<br>Setty, MD                                                                                                                                                                                            | Kimberly E.<br>Halverson, RHIT<br>Christine Roraff, RN<br>Jonean Thorsen, RN<br>Amarachi Ojajuni                             | La Crosse, WI                 | Gundersen Lutheran<br>Medical Center (8)                                                                |
| Rajat S. Barua, MD,<br>PhD                                                                                                                                                                                          | Oni Olurinde<br>Kamalakar Surineni                                                                                           | Kansas City,<br>MO            | Kansas City VA<br>Medical Center (8)                                                                    |
| Fadi Hage, MD<br>Christiano Caldeira,<br>MD<br>James E. Davies,<br>MD<br>Massoud Leesar,<br>MD<br>Jaekyeong Heo,<br>MD<br>Amy Iskandrian, MD<br>Firas Al Solaiman,<br>MD<br>Satinder Singh, MD<br>Khaled Dajani, MD | Badhma Valaiyapathi,<br>MD                                                                                                   | Birmingham,<br>AL             | UAB Vascular<br>Biology and<br>Hypertension<br>Program (8)                                              |
| Mohammad El-<br>Hajjar, MD<br>Paul Der<br>Mesropian, MD<br>Joseph Sacco, MD<br>Brian McCandless,<br>MD<br>Marisa Orgera, MD<br>Mandeep S. Sidhu,<br>MD, MBA (2012-<br>2016 )                                        | Carol M. Kartje, BSN<br><br>Michele Rawlins, NP<br>Jennifer Thomson, MA                                                      | Maywood, IL<br><br>Albany, NY | Loyola University<br>Medical Center (8)<br><br>Samuel Stratton VA<br>Medical Center of<br>Albany NY (7) |
| Imran Arif, MD<br>Hanan Kerr, MD                                                                                                                                                                                    | Mary Colleen Rogge,<br>RN<br>Julie Bunke , BA<br>Kendra Unterbrink ,<br>PA<br>Jacqueline Fannon,<br>RN<br>Cynthia Burman, NP | Cincinnati, OH                | Cincinnati VA Medical<br>Center (7)                                                                     |
| Jorge F. Trejo<br>(Gutierrez), MD<br>Gerald Fletcher, MD<br>Gary E. Lane, MD<br>Lynn M. Neeson,<br>DNP<br>Pragnesh P. Parikh,<br>MD                                                                                 | Marcia F. Dubin,<br>CCRP                                                                                                     | Jacksonville,<br>FL           | Mayo Clinic Florida<br>(7)                                                                              |

|                                                                                                                                                                                                                                             |                                                                                                                |                             |                                                              |
|---------------------------------------------------------------------------------------------------------------------------------------------------------------------------------------------------------------------------------------------|----------------------------------------------------------------------------------------------------------------|-----------------------------|--------------------------------------------------------------|
| Peter M. Pollak, MD<br>Brian P. Shapiro,<br>MD<br>Kevin Landolfo, MD<br>Anthony<br>Gemignani, MD<br>Daniel O'Rourke,<br>MD                                                                                                                  | Sarah Beaudry, RN                                                                                              | White River<br>Junction, VT | VAMC-White River<br>Junction (7)                             |
| Judith L. Meadows,<br>MD                                                                                                                                                                                                                    | Stephanie A. Tirado,<br>RN<br>Janet Halliday<br>Pamela Julian                                                  | West Haven,<br>CT           | VA Connecticut<br>Healthcare System<br>(7)                   |
| Jason T. Call, MD                                                                                                                                                                                                                           | Stephanie, M. Lane,<br>RN, BSN, CCRN<br>Jennifer L. Stanford,<br>RN, MSN                                       | Winchester,<br>VA           | Winchester<br>Cardiology and<br>Vascular Medicine,<br>PC (7) |
| Joseph Hannan,<br>MD<br>Robert Bojar, MD<br>Deepti Kumar, MD<br>John Mukai, MD                                                                                                                                                              | Patricia Arsenault, RN<br>Pamela Sigel, RN                                                                     | Worcester,<br>MA            | Saint Vincent<br>Hospital at Worcester<br>Medical Center (7) |
| Edward T. Martin,<br>MS, MD                                                                                                                                                                                                                 | Miriam Brooks                                                                                                  | Tulsa, OK                   | Oklahoma Heart<br>Institute (7)                              |
| Gabriel Vorobiof,<br>MD                                                                                                                                                                                                                     | Ladda Douangvila<br>Rubine Gevorgyan<br>Fatima Ranjbaran, RN                                                   | Los Angeles,<br>CA          | Ronald Reagan<br>UCLA Medical Center<br>(7)                  |
| Alec Moorman, MD                                                                                                                                                                                                                            | Bryn Smith, BS<br>Carly Ohmart                                                                                 | Seattle, WA                 | University of<br>Washington Medical<br>Center (7)            |
| Scott Kinlay, MBBS,<br>PhD<br>Robert J.<br>Hamburger, MD<br>Thomas P. Rocco,<br>MD<br>Deepak L. Bhatt,<br>MD, MPH<br>Kevin Croce, MD,<br>PhD<br>Jacquelyn A Quin,<br>MD<br>Jati Anumpa, MD<br>Marco Zenati, MD,<br>MSc<br>David P Faxon, MD | Samantha Ly, MA<br>Margot C. Quinn, BA<br>Sara Temiyasathit,<br>PhD<br>Jacquelyn Do, MPH<br>Desiree Tobin, MPH | West<br>Roxbury, MA         | VA Boston<br>Healthcare System<br>(6)                        |
| Glenn Rayos, MD                                                                                                                                                                                                                             | Jennifer Langdon<br>Marcia Werner Bayer<br>Amanda O'Malley                                                     | Daytona<br>Beach, FL        | Daytona Heart Group<br>(6)                                   |
| Ashraf Seedhom,<br>MD<br>Lance Sullenberger,<br>MD                                                                                                                                                                                          | Erin Orvis                                                                                                     | Albany, NY                  | Capital Cardiology<br>Associates (6)                         |
| Gregory<br>Kumkumian, MD                                                                                                                                                                                                                    | Mandy Murphy, RN<br>Ann Greenberg, RN                                                                          | Bethesda, MD                | NIH Heart Center at<br>Suburban Hospital (6)                 |

|                                                                                                                                                                                                                                                                                                                   |                                                                                                                      |                                                          |                                                                                                                                           |
|-------------------------------------------------------------------------------------------------------------------------------------------------------------------------------------------------------------------------------------------------------------------------------------------------------------------|----------------------------------------------------------------------------------------------------------------------|----------------------------------------------------------|-------------------------------------------------------------------------------------------------------------------------------------------|
|                                                                                                                                                                                                                                                                                                                   | Margaret Iraola, RN                                                                                                  |                                                          |                                                                                                                                           |
| Steven P. Sedlis, MD<br>Robert M. Donnino, MD<br>Jeffrey Lorin, MD<br>Jacqueline E. Tamis-Holland, MD<br>Robert Kornberg, MD<br>Robert Leber, MD<br>Souheil Saba, MD<br>Michael W. Lee, MD<br>Delano R. Small, MD<br>Wassim Nona, MD<br>Patrick B. Alexander, MD<br>Iram Rehman, MD                               | Leandro C. Maranan, CCRC                                                                                             | New York, NY                                             | VA New York Harbor Health Care System (6)                                                                                                 |
|                                                                                                                                                                                                                                                                                                                   | Ammy Malinay, RN                                                                                                     | Ridgewood, NJ                                            | Mount Sinai Saint Luke's Hospital (6)                                                                                                     |
|                                                                                                                                                                                                                                                                                                                   | Candice P. Edillo, RN                                                                                                | Southfield, MI                                           | Providence - Providence Park Hospital (6)                                                                                                 |
| Umesh Badami, MD                                                                                                                                                                                                                                                                                                  | Ann Ostrander, RN<br>Stephanie Wasmiller, RN<br>Wendy Drewes, RN<br>Dipti Patel, RN                                  | Saginaw, MI                                              | Covenant Medical Center, Inc. (5)                                                                                                         |
| Kevin Marzo, MD<br>Inga H. Robbins, MD<br>Howard A. Levite, MD<br>Sanjay Shetty, MD<br>Mayuri Patel, MD                                                                                                                                                                                                           | Jackie M White, RN, BSN CCRC<br>Alison Hallam                                                                        | Mineola, NY<br>Pomona, NJ                                | NYU Winthrop (5)<br>AtlantiCare Regional Medical Center (5)                                                                               |
| Glenn S. Hamroff, MD<br>Raymond W. Little, MD<br>Brandi D. Zimbelman, FNP-C<br>Charles Y. Lui, MD<br>Brigham R. Smith, MD<br>Daniel P. Vezina, MD, MSC<br>Lillian L. Khor, MBBCh, MSc<br>Josephine D. Abraham, MD, MPH<br>David A. Bull, MD<br>Stephen H. McKellar, MD, MSc<br>David Booth, MD<br>John Kotter, MD | Benjamin J Spooner, RPA-C<br>Linda M Hollenweger, LPN, CCRC<br>Holly Little<br>Tiffany Little<br>Nona A Eskelson, RN | Cortlandt Manor, NY<br>Houston, TX<br>Salt Lake City, UT | NYP Medical Medical Group Hudson Valley Cardiology (5)<br>Houston Heart & Vascular Associates (5)<br>Salt Lake City VA Medical Center (4) |
|                                                                                                                                                                                                                                                                                                                   | Yvonne Taul, RN<br>Caroline Rodgers, RN                                                                              | Lexington, KY                                            | Lexington VA Medical Center (4)                                                                                                           |

|                            |                                 |                  |                                                     |
|----------------------------|---------------------------------|------------------|-----------------------------------------------------|
| Ahmed Abdel-Latif, MD, PhD | Jennifer Isaacs, MS             |                  |                                                     |
|                            | Viktoria Bulkley                |                  |                                                     |
| Bob Hu, MD                 | Renee Kaneshiro                 | Palo Alto, CA    | Palo Alto Medical Foundation Research Institute (4) |
| Arthur J. Labovitz, MD     |                                 |                  |                                                     |
| Michael Berlowitz, MD      | Bonnie J. Kirby, RN, MSN        |                  |                                                     |
| Philip Rogal, MD           | Nhi N. Tran, MS                 | Tampa, FL        | University of South Florida (4)                     |
| Christopher McFarren, MD   | Catherine Jahrsdorfer, RN, BSN  |                  |                                                     |
| Fadi Matar, MD             |                                 |                  |                                                     |
| Christiano Caldeira, MD    |                                 |                  |                                                     |
| David J. Maron, MD         |                                 |                  |                                                     |
| Fatima Rodriguez, MD, MPH  | Reem Yunis, PhD                 |                  |                                                     |
| Ingela Schnittger, MD      | Jhina Patro                     | Stanford, CA     | Stanford University School of Medicine (4)          |
| William F. Fearon, MD      |                                 |                  |                                                     |
| Prakash Deedwania, MD      |                                 |                  |                                                     |
| Kiran Reddy, MD            | Antonia Vega                    | Fresno, CA       | UCSF - Fresno Community Regional Medical Center (4) |
|                            | Hugo Bloise-Adames              |                  |                                                     |
| Joseph Sweeny, MD          | Santa Jimenez                   | New York, NY     | Icahn School of Medicine at Mount Sinai (4)         |
|                            | Nicole Saint Vrestil            |                  |                                                     |
|                            | Reyna Bhandari                  |                  |                                                     |
| Christopher Spizzieri, MD  | Danielle Schade                 | Camp Hill, PA    | Holy Spirit Hospital Cardiovascular Institute (4)   |
|                            | Roxanne Yost                    |                  |                                                     |
| Claudia P Hochberg, MD     | Paula Beardsley                 | Boston, MA       | Boston Medical Center (4)                           |
|                            | Denise Fine                     |                  |                                                     |
|                            | Jana Tancredi, RN, MA/MSN, CCRN |                  |                                                     |
| William D. Salerno, MD     | Patricia Arakelian              | Saddle Brook, NJ | Hackensack University Medical Center (4)            |
|                            | Susan Mathus                    |                  |                                                     |
|                            | Deborah O'Neill                 |                  |                                                     |
|                            | Joy Burkhardt, CCRP             |                  |                                                     |
| Ray Wyman, MD              | Suellen Hosino, RN, BSN, CCRP   | Torrance, CA     | Torrance Memorial Medical Center (4)                |
|                            | Oksana A. Lubyayaya, BA         |                  |                                                     |
|                            | Jose D. Salas, BS               |                  |                                                     |
| Amer Zarka, MD             | Maria Aguirre                   | Santa Ana, CA    | Coastal Heart Medical Group (4)                     |
| Anil V. Shah, MD           | Manu Dhawan                     |                  |                                                     |
|                            | Diana Parra                     |                  |                                                     |
|                            | Tri Tran                        |                  |                                                     |

|                                                                                                                      |                                                                                                                         |                      |                                                    |
|----------------------------------------------------------------------------------------------------------------------|-------------------------------------------------------------------------------------------------------------------------|----------------------|----------------------------------------------------|
| Thomas Haldis, DO                                                                                                    | Catherine Weick, BSRT(R)(VI)<br>Katie Fowler-Lehman, BSN<br>Natalie Spitzer, BSN<br>Casey Riedberger<br>Catherine Weick | Fargo, ND            | Sanford Health (4)                                 |
| Jeffrey A. Kohn, MD                                                                                                  | Stanley E. Cobos, BA<br>Raven R. Dwyer, MPH<br>Dalisa Espinosa, MBS<br>Kirsten J. Quiles, MS<br>Carrie Drum, RN         | New York, NY         | NYU New York Medical Associates (4)                |
| Saket Girotra, MD                                                                                                    | Kimberly Miller-Cox, RN<br>Amy Ollinger, RN<br>Elizabeth Capasso-Gulve                                                  | Iowa City, IA        | University of Iowa Hospitals and Clinics (4)       |
| Omar Almousalli, MD                                                                                                  | Alaine Melanie Loehr<br>Marlowe Mosley<br>Shirin Heydari, MS                                                            | Fairview Heights, IL | Advanced Heart Care Group (4)                      |
| Mayil S. Krishnam, MD<br>Jeffrey C. Milliken, MD<br>Pranav M. Patel, MD<br>Arnold H. Seto, MD<br>Kevin T. Harley, MD | Andrea M. Lundeen, MA<br>Edgar Karanjah, MD<br>Wanda C. Marfori, MD<br>Eduardo Hernandez-Rangel, MD<br>Pam Singh        | Orange, CA           | University of California Irvine Medical Center (3) |
| Michael A. Gibson, MD<br>Byron J. Allen, MD                                                                          | Anne Marie Webb, BSN<br>Ellie Fridell, BS<br>Heidi Wilson, BS                                                           | Louisville, KY       | University of Louisville (3)                       |
| Rita Coram, MD                                                                                                       | Angela Kim, BS                                                                                                          |                      |                                                    |
| Sabu Thomas, MD, MSc<br>Ronald G Schwartz, MD, MS<br>Wei Chen, MD, MS                                                | Patrick Wilmot, BS                                                                                                      | Rochester, NY        | University of Rochester (3)                        |
| Mahfouz El Shahawy, MD                                                                                               | Ramona Stevens                                                                                                          | Sarasota, FL         | Cardiovascular Center of Sarasota (3)              |
| James Stafford, MD                                                                                                   | Loriane Black                                                                                                           | Baltimore, MD        | University of Maryland Medical Center (3)          |
| William B. Abernethy, MD                                                                                             | Amber B. Hull, RN<br>Olivia J. Lim, RN<br>Helen C. Tucker<br>Natasha C. Putnam, RN<br>Linda L. Hall                     | Asheville, NC        | Asheville Cardiology Associates (3)                |

|                              |                              |                  |                                                       |
|------------------------------|------------------------------|------------------|-------------------------------------------------------|
|                              | Tia Cauthren                 |                  |                                                       |
|                              | Trish Tucker                 |                  |                                                       |
| Andrew Zurick, MD            | Hollie Horton                | Nashville, TN    | Saint Thomas Hospital (3)                             |
|                              | Jan Orga                     |                  |                                                       |
| Thomas M. Meyer, MD          | Joyce R. White, MSN NP-C     | Lynchburg, VA    | Stroobants Cardiovascular Center (3)                  |
| Ronald G. Morford, MD        | Cynthia Baumann, RN          |                  |                                                       |
| Bruce Rutkin, MD             | Vidya Seeratan               | Manhasset, NY    | Northwell Health - Manhasset (3)                      |
| Sabahat Bokhari, MD          | Magnolia Jimenez             | New York, NY     | Columbia University Medical Center (3)                |
| Seth I. Sokol, MD            | Cidney Schultz, RN           |                  |                                                       |
| Jay Meisner, MD              | Jeanne Russo, RN             | Bronx, NY        | Jacobi Medical Center (3)                             |
| Ihab Hamzeh, MD              |                              |                  |                                                       |
| Arunima Misra, MD            | Zohra Huda, RN, BSN, CCRP    |                  |                                                       |
| Matthew Wall Jr., MD         | Araceli Boan                 | Houston, TX      | Baylor College of Medicine (3)                        |
| Veronica Lenges De Rosen, MD |                              |                  |                                                       |
| Mahboob Alam, MD             |                              |                  |                                                       |
| Michael C. Turner, MD        | Christine R Hinton           | Lake Charles, LA | Cardiovascular Specialists of Southwest Louisiana (3) |
| Thomas J. Mulhearn, MD       |                              |                  |                                                       |
|                              | Beth A. Archer, BSN, RN      |                  |                                                       |
|                              | Julia S. Dionne, BA          |                  |                                                       |
|                              | Cheryl A. Allardyce, BSN, RN |                  |                                                       |
| Arnold P. Good, MD           | Lindsey N. Sikora, BSN, RN   | Columbus, OH     | Ohio Health Grant Medical Center (3)                  |
|                              | Jennifer H. Czerniak, RN     |                  |                                                       |
|                              | Jennifer A. Mull, MSN, RN    |                  |                                                       |
|                              | Elizabeth Ferguson           |                  |                                                       |
|                              | Frances Laube                |                  |                                                       |
| Nicolas W. Shammass, MD, MS  | Gail A Shammass, BSN, RN     | Davenport, IA    | Midwest Cardiovascular Research Foundation (3)        |
|                              | Lori Christensen             |                  |                                                       |
|                              | Holly Park                   |                  |                                                       |
| Robert Chilton, MD           | Joan Hecht                   | San Antonio, TX  | Audie Murphy V.A. (2)                                 |
| Patricia K. Nguyen, MD       | Davis Vo, BS                 |                  | VA Palo Alto Healthcare System (2)                    |
|                              | James Hirsch                 | Palo Alto, CA    |                                                       |
| Matthew Jezior, MD           | Jody Bindeman                |                  | Walter Reed National Military Medical Center (2)      |
|                              | Sara Salkind                 | Bethesda, MD     |                                                       |
|                              | Dalisa Espinosa, MBS         |                  |                                                       |
|                              | Lori-Ann Desimone, BSN       | Providence, RI   | Miriam Hospital (2)                                   |



|                                                                                                                              |                                                                                                                |                     |                                                                      |
|------------------------------------------------------------------------------------------------------------------------------|----------------------------------------------------------------------------------------------------------------|---------------------|----------------------------------------------------------------------|
| Paul C. Gordon, MD<br>Thomas Crain, MD                                                                                       | Lina Felix-Stern<br>Jassira Gomes<br>Catherine Gordon,<br>BSN                                                  |                     |                                                                      |
| Robert Stenberg,<br>MD                                                                                                       | Aimee Mann<br>Theresa McCreary<br>Stanley E. Cobos, BA                                                         | Johnstown,<br>PA    | Conemaugh Valley<br>Memorial Hospital (2)                            |
| Ronald P. Pedalino,<br>MD                                                                                                    | Raven R. Dwyer, MPH<br>Dalisa Espinosa, MBS<br>Kirsten J. Quiles, MS<br>Stanley E. Cobos, BA                   | Brooklyn, NY        | NYU-HHC Kings<br>County Hospital<br>Center (2)                       |
| Joseph Wiesel, MD                                                                                                            | Raven R. Dwyer, MPH<br>Dalisa Espinosa, MBS<br>Kirsten J. Quiles, MS<br>Candace Gopaul, BS                     | Flushing, NY        | New York University -<br>Langone<br>Cardiovascular<br>Associates (2) |
| George J. Juang,<br>MD                                                                                                       | Karen Hultberg<br>Tauqir Huk<br>Afshan Hussain<br>Yesenia Zambrano,<br>BS                                      | Brooklyn, NY        | Coney Island Hospital<br>(2)                                         |
| Mohammed Al-<br>Amodi, MD                                                                                                    | Sarah Medina<br>Rodriguez<br>Trudie Milner<br>Abbey Mulder, RN                                                 | Yuma, AZ            | Yuma Regional<br>Medical Center (2)                                  |
| David Wohns, MD                                                                                                              | Stacie Van<br>Oosterhout, MEd                                                                                  | Grand Rapids,<br>MI | Spectrum Health (2)                                                  |
| Ellis W. Lader, MD                                                                                                           | Martha Meyer, RN,<br>MSN<br>Nancy L. Clapp, RN,<br>BA, CCRC<br>Heather Barrentine<br>Jenne M. Jose, PA         | Kingston, NY        | Mid Valley Cardiology<br>(1)                                         |
| Michael Mumma,<br>MD                                                                                                         |                                                                                                                | Sarasota, FL        | Sarasota Memorial<br>Hospital (1)                                    |
| Lekshmi<br>Dharmarajan , MD                                                                                                  | Stanley E. Cobos, BA<br>Raven R. Dwyer, MPH<br>Dalisa Espinosa, MBS<br>Kirsten J. Quiles, MS<br>Jenne Manchery | Bronx, NY           | NYU-HHC Lincoln<br>Medical and Mental<br>Health Center (1)           |
| Joseph F.X.<br>McGarvey Jr, MD<br>Thomas R.<br>Downes, MD (till<br>Dec. 2016)<br>Gary J. Luckasen,<br>MD (from Dec.<br>2016) | Vera McKinney, RN<br>Linda Schwarz, RN<br>Scott M. Kaczowski<br>Adam J. Jaskowiak                              | Doylestown,<br>PA   | Doylestown Health<br>Cardiology (1)                                  |
| Benjamin Cheong,<br>MD                                                                                                       | Joel Klitch<br>Debra Dees                                                                                      | Loveland, CO        | Medical Center of the<br>Rockies (1)                                 |
|                                                                                                                              |                                                                                                                | Houston, TX         | Baylor St. Luke's<br>Medical Center (1)                              |

|                                                                                                                      |                                                               |                      |                                                                  |
|----------------------------------------------------------------------------------------------------------------------|---------------------------------------------------------------|----------------------|------------------------------------------------------------------|
| Srinivasa Potluri,<br>MD                                                                                             | Precilia Vasquez                                              | Plano, TX            | Baylor Research<br>Institute at Legacy<br>Heart Center (1) **    |
| Ronald A. Mastouri,<br>MD<br>Jeffery A. Breall,<br>MD, PhD<br>George E. Revtyak,<br>MD<br>Jonathan W.<br>Bazeley, MD | Elise L. Hannemann,<br>RN,CCRC<br>Judy Mae Foltz,<br>RN,CCRC  | Indianapolis,<br>IN  | Indiana<br>University/Krannert<br>Institute of Cardiology<br>(1) |
| Dayuan Li, MD                                                                                                        | Emily DeRosa<br>Beth Jorgenson<br>Joyce Riestenberg-<br>Smith | St. Paul, MN         | HealthEast Saint<br>Joseph's Hospital (1)                        |
| Kenneth Giedd, MD                                                                                                    |                                                               | New York, NY         | Beth Israel Medical<br>Center (1)                                |
| Wayne Old, MD                                                                                                        | Rebecca Bariciano                                             | Chesapeake,<br>VA    | Cardiovascular<br>Associates, Ltd. (1)                           |
| Francis Burt, MD                                                                                                     |                                                               | Bethlehem,<br>PA     | Saint Luke's Hospital<br>and Health Network<br>(1)               |
| Kozhaya Sokhon,<br>MD                                                                                                | Jessica Waldron<br>Michelle Mayon                             | Sugar land,<br>TX    | Medicus Alliance<br>Clinical Research<br>Org., Inc. (1)          |
| Deepika Gopal, MD                                                                                                    |                                                               | Plano, TX            | The Heart Hospital<br>Baylor (1)                                 |
| Uma S. Valeti, MD                                                                                                    | Gretchen Ann Peichel,<br>RN<br>Brandy Starks                  | Minneapolis,<br>MN   | University of<br>Minnesota (1)                                   |
| Jon Kobashigawa,<br>MD                                                                                               | Lucilla Garcia<br>Maria Thottam                               | Beverly Hills,<br>CA | Cedars Sinai Medical<br>Center (1)                               |

India (941)

Country Leader

Balram Bhargava, DM

|                                                                                                                                                                 |                                                                                                                                                  |           |                                                                               |
|-----------------------------------------------------------------------------------------------------------------------------------------------------------------|--------------------------------------------------------------------------------------------------------------------------------------------------|-----------|-------------------------------------------------------------------------------|
|                                                                                                                                                                 | Anjali Anand, MSc                                                                                                                                |           |                                                                               |
| Sajeiv Chakanalil<br>Govindan, MD,<br>DNB, DM, PhD<br>Rajesh Gopalan<br>Nair, MD, DNB, DM                                                                       | Janitha Raj, B.Tech<br>Reshma Ravindran,<br>MSc<br>Rajalekshmi VS, MSc,<br>MScCRR                                                                | Calicut   | Government Medical<br>College (208)                                           |
| Cholenahally<br>Nanjappa<br>Manjunath, MD, DM<br>Nagaraja Moorthy,<br>MD, DM<br>Satvic Cholenahally<br>Manjunath, MD,DM<br>Suryaprakash<br>Narayanappa,<br>MBBS | Nandita Nataraj,<br>BE(Biotech)<br>PGDICRCMD<br>Soundarya Nayak,<br>BE(Biotech)<br>PGDICRCMD<br>Mahevamma<br>Mylarappa, GNM<br>(General Nursing) | Bangalore | Sri Jayadeva Institute<br>of Cardiovascular<br>Sciences and<br>Research (149) |

|                                                                                                                                                                                                                                                                                                                                                                                                                                            |                                                                                               |                            |                                                                               |
|--------------------------------------------------------------------------------------------------------------------------------------------------------------------------------------------------------------------------------------------------------------------------------------------------------------------------------------------------------------------------------------------------------------------------------------------|-----------------------------------------------------------------------------------------------|----------------------------|-------------------------------------------------------------------------------|
| Neeraj Pandit, MD,<br>DM<br>Ranjit Kumar Nath,<br>MD, DM                                                                                                                                                                                                                                                                                                                                                                                   | Sheromani Bajaj<br><br>Vandana Yadav,<br>Msc,PGDACR<br>Girish Mishra, Msc,<br>PGDACR          | New Delhi                  | Dr Ram Manohar<br>Lohia Hospital (101)                                        |
| S.K. Dwivedi, DM<br>V.S. Narain, DM<br>Sharad Chandra,<br>DM                                                                                                                                                                                                                                                                                                                                                                               | Roma Tewari, PG<br>Meenakshi Mishra, PG<br>Shivali Patel<br><br>Suman Singh, PG               | Lucknow                    | King George's<br>Medical University,<br>Department of<br>Cardiology (100)     |
| Gurpreet S.<br>Wander, DM<br>Rohit Tandon, MD<br>Sarju Ralhan, M.Ch<br>(CTVS)<br>Naved Aslam, DM                                                                                                                                                                                                                                                                                                                                           | Baljeet Kaur, MSc<br>(Biotechnology)<br>Sonika Gupta , MBA,<br>B. Pharmacy                    | Ludhiana                   | Hero DMC Heart<br>Institute, Dayanand<br>Medical College and<br>Hospital (83) |
| Abhishek Goyal,<br>DM<br>Balram Bhargava,<br>DM<br>G.Karthikeyan, DM<br>S.Ramakrishnan,<br>DM<br>Sandeep Seth, DM<br>Rakesh Yadav, DM<br>Sandeep Singh, DM<br>Ambuj Roy, DM<br>Neeraj Parakh, DM<br>Sunil Kumar Verma,<br>DM<br>Rajiv Narang, DM<br>Sundeep Mishra,<br>DM<br>Nitish Naik, DM<br>Gautam Sharma,<br>DM<br>Shiv Kumar<br>Choudhary, M.Ch<br>Chetan Patel, DNB<br>Gurpreet Gulati, MD<br>Sanjeev Sharma,<br>MD<br>V K Bahl, DM | Chandini Suvarna,<br>BDS                                                                      | New Delhi                  | All India Institute Of<br>Medical Sciences<br>(67)                            |
| Anoop Mathew, MD<br>Eapen Punnoose,<br>MD<br>Milind Avdhoot<br>Gadkari, MD<br>Siddharth Gadage,<br>MD DNB                                                                                                                                                                                                                                                                                                                                  | Binoy<br>Mannekkattukudy<br>Kurian<br><br>Sheetal Rupesh<br>Karwa, BHMS<br>Suvarna Kolhe, MSc | Kolenchery<br><br><br>Pune | MOSC Medical<br>College Hospital (39)<br><br>KEM Hospital Pune<br>(35)        |

|                                                                                                                         |                                                                                                                                                                                        |                        |                                                                                             |
|-------------------------------------------------------------------------------------------------------------------------|----------------------------------------------------------------------------------------------------------------------------------------------------------------------------------------|------------------------|---------------------------------------------------------------------------------------------|
| Tapan Umesh<br>Pillay, BHMS MSc                                                                                         |                                                                                                                                                                                        |                        |                                                                                             |
| Santhosh Satheesh,<br>MBBS, MD, DM                                                                                      | R. J. Vindhya, B.Sc.<br>(Bio-Technology),<br>MSc(Bio-Informatics)                                                                                                                      | Pondicherry            | Jawaharlal Institute of<br>Postgraduate Medical<br>Education &<br>Research (JIPMER)<br>(31) |
| Atul Mathur, MD<br>Upendra Kaul, MD                                                                                     | Peeyush Jain, MD<br>Ashok Seth, MD<br>Zile Singh Meharwal,<br>MD<br>Atul Verma, MD<br>Mona Bhatia, MD<br>Ankush Sachdeva,<br>MD<br>Thounaojam Indira<br>Devi, RN<br>Nungshi Jungla, RN | New Delhi              | Fortis Escort Heart<br>Institute<br>(31)                                                    |
| Johann Christopher,<br>MD, DNB<br>Rajeev Menon, MD,<br>DNB<br>Nirmal Kumar, MD,<br>DNB<br>Abraham Oomman,<br>MD,DM,DNB  | K. Manjula Rani, MSc.<br>M. Sowjanya Reddy,<br>BSc<br>K. Preethi, BSc<br>Rinu R sidh,<br>MSc(Clinical<br>Research)                                                                     | Hyderabad              | Gurunanak CARE<br>Hospital (27)                                                             |
| Robert Mao, MD,<br>DM                                                                                                   | Ramakrishnan T.,<br>B.Tech(Biotechnology<br>)<br>Rajesh Francis,<br>MSc(Clinical<br>Research)                                                                                          | Chennai                | Apollo Research and<br>Innovation (23)                                                      |
| Hilda Solomon, PhD                                                                                                      |                                                                                                                                                                                        |                        |                                                                                             |
| Sudhir Naik, MD,<br>DM<br>Sajeeda Parveen<br>Khan, MBBS,<br>(Dip.Card)<br>Johann Christopher,<br>MD<br>Nirmal Kumar, MD | Vamshi Priya P., MSc<br>Kotiboinna Preethi                                                                                                                                             | Hyderabad<br>Hyderabad | Apollo Research &<br>Innovations (13)<br>CARE Nampally (11)                                 |
| Purvez Grant, MD                                                                                                        | Shweta Hande,<br>BHMS, PGDCR<br>Poonam Sonawane,<br>B.ScMicrobiology,<br>ACCR<br>Abhishek Dubey                                                                                        | Pune                   | Ruby Hall<br>Clinic,Grant Medical<br>Foundation (10)                                        |
| Ranjan Kachru, MD                                                                                                       | Kavita Rawat                                                                                                                                                                           | New Delhi              | Fortis Healthcare Fl.t<br>Lt. Rajan Dhall<br>Hospital (4)                                   |
| Ajit Kumar VK, MD,<br>DM<br>Sanjay Ganapathi,<br>MD, DM<br>Jayakumar K, MS,<br>M.Ch                                     | Vineeth CP                                                                                                                                                                             | Trivandrum             | Sree Chitra Tirunal<br>Institute for Medical<br>Sciences and<br>Technology (3)              |

|                                        |                                                |                                                         |               |                                                                                  |
|----------------------------------------|------------------------------------------------|---------------------------------------------------------|---------------|----------------------------------------------------------------------------------|
|                                        | Harikrishnan<br>Sivadasanpillai,<br>MD, DM     | Manas Chacko, RN                                        |               |                                                                                  |
|                                        | Bijulal Sasidharan,<br>MD, DM                  | Suresh Babu                                             |               |                                                                                  |
|                                        | Kapilamoorthy TR,<br>MD                        |                                                         |               |                                                                                  |
|                                        | Johann Christopher,<br>MD                      | Sowjanya Reddy                                          |               |                                                                                  |
|                                        | Praneeth Polamuri,<br>MD                       | Manjula Rani                                            | Hyderabad     | CARE Hospital (3)                                                                |
|                                        | Upendra Kaul, MD                               | Priyadarshani<br>Arambam<br>Bebek Singh                 | New Delhi     | Batra Hospital and<br>Medical Research<br>Centre (BHMRC) (3)                     |
| United Kingdom (539)                   |                                                |                                                         |               |                                                                                  |
| Country Leaders                        |                                                |                                                         |               |                                                                                  |
| Roxy Senior, MBBS,<br>MD, DM           |                                                |                                                         |               |                                                                                  |
| Keith AA Fox, MBChB<br>( <i>past</i> ) |                                                |                                                         |               |                                                                                  |
| Country Coordinators                   |                                                |                                                         |               |                                                                                  |
| Grace M. Young , MSc, BSc (Hons)       |                                                |                                                         |               |                                                                                  |
| Kathryn Carruthers<br>( <i>past</i> )  |                                                |                                                         |               |                                                                                  |
|                                        | Roxy Senior,<br>MBBS, MD, DM                   |                                                         |               |                                                                                  |
|                                        | Ahmed Elghamaz,<br>MB BCh                      |                                                         |               |                                                                                  |
|                                        | Sothinathan                                    |                                                         |               |                                                                                  |
|                                        | Gurunathan,<br>MBChB                           |                                                         |               |                                                                                  |
|                                        | Nikolaos<br>Karogiannis, MBBS                  | Grace M. Young ,<br>MSc, BSc (Hons)                     |               |                                                                                  |
|                                        | Benoy N Shah, MD,<br>MBBS, BSc (Hons)          | Christopher Kinsey                                      |               | Northwick Park<br>Hospital Harrow/<br>Royal Brompton<br>Hospital London<br>(202) |
|                                        | Richard HJ Trimlett,<br>MBBS, CCST             | Raisa Kavalakkat,<br>MSc, BSc, RN                       | Harrow        |                                                                                  |
|                                        | Michael B Rubens,<br>LRCP, MRCS,<br>MBBS, DMRD | Jo Evans, RN                                            |               |                                                                                  |
|                                        | Edward D Nicol,<br>MD, BMedSci,<br>MBBS, DTM&H | Ikraam Hassan, RN                                       |               |                                                                                  |
|                                        | Tarun K Mittal, MD                             |                                                         |               |                                                                                  |
|                                        | Reinette Hampson,<br>BSc (Hons), BA<br>(Hons)  |                                                         |               |                                                                                  |
|                                        | Reto Andreas<br>Gamma, MBBS                    | Sarah Williams, RN<br>Kim Holland, RN<br>Karen Swan, RN | Chelmsford    | Broomfield Hospital<br>(39)                                                      |
|                                        | Mark A de Belder,<br>MD                        | Bev Atkinson, RN                                        | Middlesbrough | The James Cook<br>University Hospital,<br>Middlesbrough (37)                     |
|                                        | Jeet Thambyrajah,<br>MD                        |                                                         |               |                                                                                  |

|                                                                                                                                                                                          |                                                                                                                                                                                                                      |                                                        |                                                                                                                                            |
|------------------------------------------------------------------------------------------------------------------------------------------------------------------------------------------|----------------------------------------------------------------------------------------------------------------------------------------------------------------------------------------------------------------------|--------------------------------------------------------|--------------------------------------------------------------------------------------------------------------------------------------------|
| Thuraia Nageh,<br>BSc(Hons) MBBS<br>MD MRCP<br>John R Davies,<br>MBBS, PhD<br>Steven J. Lindsay,<br>MD<br>John Kurian, MD<br>Haqueel Jamil, MD<br>Osama Raheem,<br>MD<br>Angela Hoye, MD | Swapna Kunhunny,<br>MRes Clin Res, BSc<br>(N), RN<br><br>Craig Atkinson, RN<br><br>Carita Krannila, RN<br>Manitha Vinod, RN<br><br>Lisa Chaytor<br><br>Leanne Cox<br>Julie Morrow<br>Kay Rowe<br>Stephanie Kelly, RN | Westcliffe on<br>Sea<br><br>Bradford<br><br>Cottingham | Southend University<br>Hospital (34)<br><br>Bradford Royal<br>Infirmary (20)<br><br>The University of<br>Hull/Castle Hill<br>Hospital (19) |
| Patrick Donnelly,<br>MD<br>Bernardas Valecka,<br>MD                                                                                                                                      | Susan Regan, RN<br><br>Dawn Turnbull<br>Catherine Fleming                                                                                                                                                            | Belfast                                                | South Eastern Health<br>and Social Care (17)                                                                                               |
| Anoop Chauhan,<br>MD                                                                                                                                                                     | Arijit Ghosh<br>Karen Gratrix<br>Stephen Preston                                                                                                                                                                     | Blackpool                                              | Blackpool Teaching<br>Hospitals (16)                                                                                                       |
| Craig Barr, MD                                                                                                                                                                           | Anne Cartwright                                                                                                                                                                                                      | Dudley                                                 | Russells Hall Hospital<br>(15)                                                                                                             |
| Khaled Alfakih,<br>MBBS, MD<br>Jonathan Byrne,<br>PhD<br>Ian Webb, PhD, MA                                                                                                               | Abigail Knighton,<br>BSc., PG Dip.<br>Katherine Martin,<br>RGN, Dip. N, MSc                                                                                                                                          | London                                                 | King's College NHS<br>Foundation Hospital<br>(14)                                                                                          |
| Peter Henriksen,<br>PhD, MB ChB,<br>BSc(Hons)                                                                                                                                            | Laura Flint, RGN<br><br>James Harrison,<br>BSc(Hons), PG dip<br>Nicki Lakeman                                                                                                                                        | Edinburgh                                              | Royal Infirmary of<br>Edinburgh (13)                                                                                                       |
| Peter OKane, MD                                                                                                                                                                          | Anja Ljubez                                                                                                                                                                                                          | Bournemouth                                            | Royal Bournemouth<br>Hospital (13)                                                                                                         |
| Ramesh de Silva,<br>MB ChB, MD                                                                                                                                                           |                                                                                                                                                                                                                      | Bedford                                                | Bedford Hospital<br>NHS Trust (11)                                                                                                         |
| Dwayne S. G.<br>Conway, MD                                                                                                                                                               | Judith Wright<br>Donna Exley                                                                                                                                                                                         | Wakefield                                              | Pinderfields Hospital<br>(11)                                                                                                              |
| Alexander A Sirker,<br>MB BChir, PhD                                                                                                                                                     | Mervyn Andiapen, RN<br>Amy J. Richards, BSc                                                                                                                                                                          | London                                                 | University College<br>London Hospitals<br>NHS Foundation<br>Trust<br><br>BartsHealth NHS<br>Trust<br><br>(11)                              |

|                                        |                                                                              |              |                                                    |
|----------------------------------------|------------------------------------------------------------------------------|--------------|----------------------------------------------------|
| Stephen P Hoole, MD                    | Lisa Wong, MSc                                                               | Cambridge    | Papworth Hospital (10)                             |
| Fraser N. Witherow, MD                 | Melanie J. Munro, RGN                                                        | Dorchester   | Dorset County Hospital (8)                         |
| Nicola Johnston, MB, Bch BAO, MRCP, MD |                                                                              |              |                                                    |
| Mark Harbinson, MB, Bch BAO, MRCP, MD  | Michelle McEvoy, RN                                                          |              |                                                    |
| Simon Walsh, MB, Bch BAO, MD           | Caroline Brown, RN                                                           | Belfast      | Belfast Trust (7)                                  |
| Hanna Douglas, MB, Bch BAO, MRCP, MD   |                                                                              |              |                                                    |
| Matthew Luckie, MD                     | Thabitha Charles<br>Laurel Kolakaluri<br>Hannah Phillips<br>Louise Morby, RN | Manchester   | Central Manchester University Hospital (7)         |
| Jolanta Sobolewska, MD                 | Karen Hallett, RN<br>Carolyn Corbett, RN<br>Lynne Winstanley                 | Oldham       | The Pennine Acute Hospitals NHS Trust (6)          |
| Paramjit Jeetley, MD                   |                                                                              |              |                                                    |
| Niket Patel, MD                        | Angelique Smit, RN                                                           | London       | Royal Free London NHS Foundation Trust (6)         |
| Tushar Kotecha, MBChB, Mpharm          |                                                                              |              |                                                    |
| Christopher Travill, MBBS, MD          | Susan Gent, SRN<br>RGN                                                       |              |                                                    |
| Iqbal Karimullah, MBBS                 | Nafisa Hussain, BSc                                                          | Luton        | Luton and Dunstable University Hospital NHS FT (5) |
| Mahmud Al-Bustami, MBBS                |                                                                              |              |                                                    |
| Denise Braganza, MD                    | Fiona Haines<br>Joanne Taaffe                                                | Peterborough | Peterborough City Hospital (5)                     |
| Robert Henderson, MD                   | Jane Burton                                                                  |              |                                                    |
| Kate Pointon, MBBS                     | Maria Colton                                                                 |              |                                                    |
| Surendra Naik, PhD                     | Rachel King                                                                  | Nottingham   | Nottingham University Hospitals (4)                |
| Thomas Mathew, MBBS, MD, DM            |                                                                              |              |                                                    |
|                                        | Ammani Brown, MSc<br>BA RN<br>Andrew Docherty, RN                            |              |                                                    |
| Colin Berry, BSc<br>MB ChB, PhD        | Lisa McCloy, RN                                                              |              |                                                    |
| Damien Collison, MB ChB                | Kate Robb, RN                                                                | Clydebank    | University of Glasgow (4)                          |
| Giles Roditi, MB ChB                   | Craig Paterson, PhD                                                          |              |                                                    |
|                                        | Wenda Crawford, RN<br>Joanne Kelly, RN                                       |              |                                                    |

|                                                                                                              |                                                                                                                                                                                                                                                                    |                                                                                                      |                              |                                                                                                           |
|--------------------------------------------------------------------------------------------------------------|--------------------------------------------------------------------------------------------------------------------------------------------------------------------------------------------------------------------------------------------------------------------|------------------------------------------------------------------------------------------------------|------------------------------|-----------------------------------------------------------------------------------------------------------|
|                                                                                                              | Andrew J Moriarty,<br>BSc MB PhD                                                                                                                                                                                                                                   | Lorraine McGregor,<br>RN<br>Anne Mackin, RN,<br>BSc                                                  | Craigavon                    | Cardiovascular<br>Research Unit,<br>Craigavon Area<br>Hospital (2)                                        |
|                                                                                                              | Jason D. Glover,<br>MBBS<br>Jiwan Pradhan,<br>MBBS<br>Ghada Mikhail, MD<br>Darrel P. Francis,<br>MD, MA                                                                                                                                                            | Janet P Knight, RN<br><br>Tuhina Bose                                                                | Basingstoke<br><br>London    | Hampshire Hospitals<br>NHS Foundation<br>Trust (2)<br><br>Imperial College<br>Healthcare NHS<br>Trust (1) |
| *Canada (447)<br>Country Leaders<br>Vladimir Dzavik, MD<br>Shaun Goodman, MD,<br>MSc<br>Gilbert Gosselin, MD |                                                                                                                                                                                                                                                                    | Anna Proietti, RN<br>Myriam Brousseau,<br>RN<br>Magalie Corfias, RN<br>Patricia Blaise<br>Luc Harvey | Montreal, QC                 | Montreal Heart<br>Institute (90)                                                                          |
|                                                                                                              | Ariel Diaz, MD<br>Philippe Rheault,<br>MD<br>Miguel Barrero, MD<br>Carl-Éric Gagné,<br>MD<br>Yanek Pépin-<br>Dubois, MD<br>Ricardo Costa, MD<br>Ying Tung Sia, MD<br>Catherine Lemay,<br>MD<br>Alejandro Gisbert,<br>MD<br>Pierre Gervais, MD<br>Alain Rheault, MD | Patricia Alarie<br><br>Linda Arcand<br>Isabelle Roy<br>Estelle Montpetit                             | Trois-Rivieres,<br>QC        | Centre Hospitalier de<br>Regional Trois-<br>Rivieres (71)                                                 |
|                                                                                                              | Denis Carl Phaneuf,<br>MD<br>Gilbert Gosselin,<br>MD                                                                                                                                                                                                               | Katia Drouin, RN<br>Christine Bergeron,<br>RN<br>Christine Shelley                                   | Terrebonne,<br>QC            | CISSSL - Hopital<br>Pierre-Le Gardeur<br>(42)                                                             |
|                                                                                                              | Pallav Garg, MBBS,<br>MSc<br>Benjamin J.W.<br>Chow, MD                                                                                                                                                                                                             | Christine Masson<br>Sandy Carr, RN<br>Catherine Bone, RN<br>Ermina Moga                              | London, ON<br><br>Ottawa, ON | London Health<br>Sciences Centre (35)<br><br>University of Ottawa<br>Heart Institute (29)                 |



|                                       |                                                                     |                  |                                     |
|---------------------------------------|---------------------------------------------------------------------|------------------|-------------------------------------|
| Renee C. Hessian, MD                  | Janetta Kourzenkova                                                 |                  |                                     |
| Rob S. Beanlands, MD                  | Olga Walter                                                         |                  |                                     |
| Richard F. Davies, MD                 |                                                                     |                  |                                     |
| Kevin R. Bainey, MD, MSc              | Norma Hogg, RN<br>Suzanne Welsh, RN                                 | Edmonton, AB     | University of Alberta (28)          |
| Asim N. Cheema, MD, PhD               |                                                                     |                  |                                     |
| Akshay Bagai, MD, MHS                 |                                                                     |                  |                                     |
| Ron Wald, MDCM, MPH                   |                                                                     |                  |                                     |
| Shaun Goodman, MD, MSc                | Khrystyna Kushniriuk, HBSc, MD                                      |                  |                                     |
| John Joseph Graham, MRCP, MB ChB, BSc | Mohammed Hussain                                                    | Toronto, ON      | St. Michael's Hospital (27)         |
| Mark Peterson, MD, FRCSC, PhD         | Olugbenga Bello                                                     |                  |                                     |
| Chi-Ming Chow, MD, CM, MSc            |                                                                     |                  |                                     |
| Beth Abramson, MD, MSc                |                                                                     |                  |                                     |
| Asim Nazir Cheema, MD                 | Ishba Syed, MBBS                                                    |                  |                                     |
| Mohammad Tariq Vakani, MD             | Mohammed Hussain, BSc(H)<br>Khrystyna Kushniriuk, MBBS              | Mississauga, ON  | Dixie Medical Group (24)            |
|                                       | Judy Otis, CRC                                                      |                  |                                     |
| James Cha, MD                         | Rebecca Otis, CRC<br>Michelle M Seib, RN                            | Oshawa, ON       | Dr. James Cha (21)                  |
| Andrew G Howarth, MD, PhD             | Sandra M Rivest, RN<br>Rosa Sandonato, BSCN                         | Calgary, AB      | University of Calgary (15)          |
| Graham Wong, MD                       | Jackie Chow<br>Andrew Starovoytov<br>Naomi Uchida<br>Ngairé Meadows | Vancouver, BC    | Vancouver General Hospital (15)     |
| Amar Uxa, MD                          | Nadia Asif<br>Suzana Tavares                                        | Toronto, ON      | University Health Network (14)      |
| Paul Galiwango, MD                    | Bev Bozek, RN, CCRC                                                 |                  |                                     |
| Saleem Kassam, MD                     | Maria Shier                                                         |                  |                                     |
| Ashok Mukherjee, MD                   | Lori-Ann Larmand                                                    | Scarborough, ON  | Scarborough Cardiology Research (9) |
| A. Joseph Ricci, MD                   | Amir Janmohamed<br>Brenda Hart                                      |                  |                                     |
| Andy Lam, MD                          | Jane Marucci<br>Sharon Tai                                          | East Grimsby, ON | West Lincoln Memorial Hospital (8)  |

|                       |                                           |                    |                                                                              |
|-----------------------|-------------------------------------------|--------------------|------------------------------------------------------------------------------|
|                       | Sonya Brons, RN<br>Chris Beck, RN         |                    |                                                                              |
| Shamir Mehta, MD      | Glenda Wong, RN<br>Krystal Etherington    | Hamilton, ON       | Hamilton General Hospital (7)                                                |
|                       | Thippeekaa<br>Arumairajah<br>Maria Aprile |                    |                                                                              |
| Jacob Udell, MD       | Sara Karlsson<br>Susan Webber             | Toronto, ON        | Women's College Hospital (7)                                                 |
| Philippe Généreux, MD | Chantale Mercure                          | Montréal, QC       | Centre Intégré Universitaire de Santé et de Services Sociaux du Montréal (2) |
| Adnan Hameed, MD      | Nancy Aedy                                | St. Catharines, ON | Saint Catharines General Hospital (2)                                        |
|                       | Fran Farquharson                          |                    |                                                                              |
| Ledjalem Daba, MD     | Anam Siddiqui                             | Vaughan, ON        | Northwest GTA Cardiovascular and Heart Rhythm Program (1)                    |

Brazil (399)

Country Leaders

Antonio Carlos Carvalho, MD, PhD

Renato D. Lopes, MD, PhD

|  |                                             |                                      |                                                          |
|--|---------------------------------------------|--------------------------------------|----------------------------------------------------------|
|  | Whady Hueb, MD                              |                                      |                                                          |
|  | Paulo Cury<br>Rezende, MD                   |                                      |                                                          |
|  | Expedito Eustáquio<br>Ribeiro Silva, MD     | Myrthes Emy Takiuti,<br>RN           | Sao Paulo                                                |
|  | Alexandre Ciappina<br>Hueb, MD              |                                      | Heart Institute (InCor)<br>University of São Paulo (127) |
|  | Paola Emanuela<br>Poggio Smanio,<br>MD, PhD | Leonardo Pizzol<br>Caetano, PhD      | São Paulo                                                |
|  | Alexandre Schaan<br>de Quadros, MD          |                                      | Instituto Dante<br>Pazzanese de<br>Cardiologia (98)      |
|  | Renato Abdala<br>Karam Kalil, MD            | Aline Peixoto Deiro                  |                                                          |
|  | José Luiz da Costa<br>Vieira, MD            | Alice Manica Muller                  |                                                          |
|  | Gabriel Grossmann<br>, MD                   | Maria Antonieta<br>Pereira de Moraes | Porto Alegre                                             |
|  | Pedro Píccaro de<br>Oliveira, MD            | Bruna Maria Ascoli                   | Instituto de<br>Cardiologia de Porto<br>Alegre (41)      |
|  | Leonardo Bridi, MD                          | Sílvia Zottis Poletti                |                                                          |
|  | Simone Savaris,<br>MD                       |                                      |                                                          |
|  | João V Vitola, MD,<br>PhD                   |                                      |                                                          |
|  | Rodrigo J Cerci,<br>MD, Msc                 | Sandra S. Zier, BSc                  | Curitiba                                                 |
|  |                                             |                                      | Quanta Diagnostico &<br>Terapia (33)                     |

|                                                                                                                                                                                                                                                                                                                                               |                                                                                                                            |                             |                                                                                                                   |  |
|-----------------------------------------------------------------------------------------------------------------------------------------------------------------------------------------------------------------------------------------------------------------------------------------------------------------------------------------------|----------------------------------------------------------------------------------------------------------------------------|-----------------------------|-------------------------------------------------------------------------------------------------------------------|--|
| Fabio R Farias, MD,<br>Msc<br>Miguel M<br>Fernandes, MD,<br>PhD<br>José Antonio Marin-<br>Neto, MD, PhD<br>André Schmidt, MD,<br>PhD<br>Moysés de Oliveira<br>Lima Filho, MD,<br>PhD<br>Ricardo Mendes<br>Oliveira, MD<br>João Reynaldo<br>Abbud Chierice, MD<br>Carisi A. Polanczyk,<br>MD<br>Mariana V. Furtado,<br>MD<br>Luis F. Smidt, MD | Vilmar Veiga Jr, BSc                                                                                                       |                             |                                                                                                                   |  |
| Antonio Carlos<br>Carvalho, MD<br>Gustavo Pucci, MD                                                                                                                                                                                                                                                                                           | Diego Franca da<br>Cunha                                                                                                   | Ribeirao Preto              | Hospital das Clinicas<br>da Faculdade de<br>Medicina de Ribeirão<br>Preto da<br>Universidade de São<br>Paulo (31) |  |
| Flavio Lyra, MD<br>Alvaro Rabelo Alves<br>Junior, MD<br>Marianna D. A.<br>Dracoulakis, MD,<br>PhD<br>Rodolfo G. S. D<br>Lima, MD<br>Estevao Figueiredo,<br>MD                                                                                                                                                                                 | Guilherme G Rucatti,<br>PsyD<br>Fernanda Igansi, BSc<br>Mauren P Haeffner,<br>BSc<br>Viviane Almeida                       | Porto Alegre                | Hospital de Clínicas<br>de Porto Alegre<br>(12)                                                                   |  |
| Paulo Ricardo<br>Caramori, MD                                                                                                                                                                                                                                                                                                                 | Gabriela Sanchez de<br>Souza                                                                                               | Sao Paulo                   | Unifesp - Hospital<br>Sao Paulo (9)                                                                               |  |
| Rogerio Tumelero,<br>MD<br>Frederico Dall'Orto,<br>MD                                                                                                                                                                                                                                                                                         | Mayana Almeida<br>Viviane dos Santos<br>Natalia S Oliveira, RN<br>Bruna Edilena Paulino<br>Azevedo<br>Marco Bizzaro Santos | Salvador                    | Fundacao Bahiana<br>de Cardiologia (9)                                                                            |  |
| Claudio T.<br>Mesquita, MD<br>Alexandre S.<br>Colafranceschi, MD                                                                                                                                                                                                                                                                              | Amanda Germann<br>Vitor Gomes<br>Rosa Homem<br>Ellen Magedanz<br>Rosane Laimer<br>Alexandre Tognon                         | Salvador                    | Hospital da Bahia (8)                                                                                             |  |
| Amarino C. Oliveira<br>Jr., MD                                                                                                                                                                                                                                                                                                                |                                                                                                                            | Belo<br>Horizonte           | Hospital Lifecenter<br>(8)                                                                                        |  |
|                                                                                                                                                                                                                                                                                                                                               |                                                                                                                            | Porto Alegre                | Hospital Sao Lucas<br>da Pontificia<br>Universidade Catolica<br>do Rio Grande do Sol<br>(7)                       |  |
|                                                                                                                                                                                                                                                                                                                                               |                                                                                                                            | Fundo<br>Pocos de<br>Caldas | Hospital Sao Vicente<br>de Paulo (5)<br>Hospital Maternidade<br>e Pronto Socorro<br>Santa Lucia (4)               |  |
|                                                                                                                                                                                                                                                                                                                                               | Roberta P Santos, RN                                                                                                       | Botafogo                    | Hospital Pró-<br>Cardíaco (3)                                                                                     |  |

|                                                                                                                                        |                                                                                                                                                                                                                                                                                                                                     |                                                                                                                                                                                                                                       |           |                                                                                                                                          |
|----------------------------------------------------------------------------------------------------------------------------------------|-------------------------------------------------------------------------------------------------------------------------------------------------------------------------------------------------------------------------------------------------------------------------------------------------------------------------------------|---------------------------------------------------------------------------------------------------------------------------------------------------------------------------------------------------------------------------------------|-----------|------------------------------------------------------------------------------------------------------------------------------------------|
|                                                                                                                                        | Luiz A. Carvalho,<br>MD<br>Isabella C. Palazzo,<br>MD<br>Andre S. Sousa,<br>MD<br>Expedito Eustáquio<br>Ribeiro da Silva,<br>MD, PhD<br>Pedro Gabriel Melo<br>de Barros e Silva,<br>MD, PhD<br>Luciana de Pádua<br>Silva Baptista, MD,<br>PhD<br>Marcelo Jamus<br>Rodrigues, MD<br>Marcos Valério<br>Coimbra de<br>Resende, MD, PhD | Mariana Yumi Okada,<br>RN<br><br>Ana Paula Batista, RN<br><br>Aline Nogueira<br>Rabaça, BS<br><br>Larissa Miranda<br>Trama<br>Talita Silva<br>Camila Thais de<br>Souza Ormundo<br>Carla Vicente<br>Caroline Pinheiro<br>Daniele Komar | Sao Paulo | Hospital TotalCor (2)                                                                                                                    |
|                                                                                                                                        | Jose Francisco<br>Saraiva, MD                                                                                                                                                                                                                                                                                                       |                                                                                                                                                                                                                                       | Sao Paulo | Hospital Celso Pierro<br>(1)                                                                                                             |
|                                                                                                                                        | Costantino<br>Costantini, MD,<br>PhD                                                                                                                                                                                                                                                                                                |                                                                                                                                                                                                                                       | Curitiba  | Hospital Cardiologico<br>Costantini (1)                                                                                                  |
| Poland (333)<br>Country Leaders<br>Witold Ruzyllo, MD<br>Hanna Szwed, MD,<br>PhD<br>Country Coordinator<br>Radoslaw Pracon,<br>MD, PhD | Marcin Demkow,<br>MD, PhD<br>Radoslaw Pracon,<br>MD, PhD<br>Cezary Kepka, MD<br>PhD<br>Anna Teresinska,<br>MD PhD<br>Karolina Kryczka,<br>MD PhD<br>Jan Henzel, MD<br>PhD<br>Mateusz Solecki,<br>MD PhD<br>Edyta Kaczmarska,<br>MD PhD<br>Tomasz Mazurek,<br>MD, PhD                                                                | Olga Walesiak<br>Katarzyna Malinowska<br><br>Jakub Maksym, MD<br>Karolina Wojtera, MD                                                                                                                                                 | Warsaw    | Coronary and<br>Structural Heart<br>Diseases<br>Department, Institute<br>of Cardiology (127)<br><br>Medical University of<br>Warsaw (48) |

Anna Fojt, MD

Ewa Szczerba, MD

Jaroslav Drozd,  
PhD  
Bartosz Czarniak,  
MD  
Malgorzata Frach  
(formerly Stasiak),  
MD  
Konrad Szymczyk,  
MD  
Iwona Niedzwiecka,  
MD  
Sebastian Sobczak,  
MD  
Tomasz Ciurus, MD

Piotr Jakubowski,  
MD  
Magdalena Misztal-  
Teodorczyk, MD  
Dawid Teodorczyk,

Marta Swiderek, MA

Aleksandra  
Fratczak, MD  
Marcin Szkopiak,  
MD  
Patrycja Lebioda,  
MD  
Michal Wlodarczyk,  
MD  
Anna Plachcinska,  
MD  
Jacek Kusmierk,  
MD  
Magdalena Miller,  
MD  
Halina Marciniak,  
MD  
Karolina Wojtczak-  
Soska, MD  
Katarzyna Łuczak,  
MD  
Tomasz Tarchalski,  
MD

Ewelina Wojtala, MA

Lodz

Cardiology Clinic,  
Medical University in  
Lodz (43)

Anna Cichocka-  
Radwan, MD  
Hanna Szwed, MD,  
PhD

Jaroslav Karwowski,  
MD

Warsaw

National Institute of  
Cardiology, Warsaw  
(35)

Grazyna Anna  
Szulczyk, MD  
Adam Witkowski,  
MD, PhD  
Krzysztof Kukula,  
MD, PhD  
Małgorzata Celińska-  
Spodar, MD

Warsaw

Department of  
Interventional  
Cardiology &  
Angiology, Institute of  
Cardiology (20)

|                                                               |                                                                                                                                                                                                                                                           |                                                                                                                                          |                       |                                                                                                                                                                                                  |
|---------------------------------------------------------------|-----------------------------------------------------------------------------------------------------------------------------------------------------------------------------------------------------------------------------------------------------------|------------------------------------------------------------------------------------------------------------------------------------------|-----------------------|--------------------------------------------------------------------------------------------------------------------------------------------------------------------------------------------------|
|                                                               | Joanna Zalewska, MD<br>Grzegorz Gajos, MD, PhD<br>Krzysztof Bury, MD, PhD                                                                                                                                                                                 |                                                                                                                                          | Krakow                | Department of Coronary Disease, John Paul II Hospital, Jagiellonian University Medical College (16)                                                                                              |
|                                                               | Piotr Pruszczyk, MD, PhD<br>Marek Roik, MD, PhD                                                                                                                                                                                                           | Andrzej Łabyk, MD<br>Agnieszka Szramowska, MD<br>Olga Zdończyk, MD                                                                       | Warszawa              | Department of Internal Medicine and Cardiology, Infant Jesus Teaching Hospital, Medical University of Warsaw (15)                                                                                |
|                                                               | Krystyna Łoboz-Grudzień, MD, PhD<br>Leszek Sokalski, MD, PhD<br>Barbara Brzezińska, MD, PhD<br>Maciej Lesiak, Professor, MD<br>Magdalena Łanocha, MD<br>Krzysztof W. Reczuch, MD<br>Zbigniew Kalarus, MD<br>Andrzej Swiatkowski, MD<br>Mariola Szulik, MD | Joanna Jaroch, MD, PhD                                                                                                                   | Wroclaw               | T.Marciniak Hospital (11)                                                                                                                                                                        |
|                                                               |                                                                                                                                                                                                                                                           | Adam Kolodziej, MD                                                                                                                       | Poznan<br>Wroclaw     | Szpital Kliniczny Przemienienia Pańskiego (10)<br>Military Hospital / Medical University (4)                                                                                                     |
|                                                               |                                                                                                                                                                                                                                                           |                                                                                                                                          | Zabrze                | Medical University of Silesia, School of Medicine with the Division of Dentistry, Department of Cardiology, Congenital Heart Diseases and Electrotherapy, Silesian Center for Heart Diseases (3) |
|                                                               | Włodzimierz J. Musiał, MD                                                                                                                                                                                                                                 | Marta Marcinkiewicz-Siemion, MD                                                                                                          | Bialystok             | University Hospital in Bialystok (1)                                                                                                                                                             |
| Russia (303)<br>Country Coordinator<br>Olga Bockeria, MD, PhD | Leo Bockeria, MD, PhD<br>Karen Petrosyan, MD, PhD<br>Tatiana Trifonova, MD<br>Alexander M. Chernyavskiy, MD, PhD<br>Evgeniy I. Kretov, MD<br>Igor O. Grazhdankin, MD                                                                                      | Olga Bockeria, MD, PhD<br>Zalina Kudzoeva, MD<br>Nodira Aripova, MD<br>Ivan A. Naryshkin, MD<br>Alena Kuleshova, MD<br>Dastan Malaev, MD | Moscow<br>Novosibirsk | National Medical Research Center for Cardiovascular Surgery (113)<br>E.Meshalkin National Medical Research Center of the Ministry of Health of the Russian Federation (101)                      |

|                                                                                                                 |                                                                                                                                                                                                                                                                                                                                                                                                                                                        |                                                                                                                                                   |                                                |                                                                                                                                                                                                                                                                                      |
|-----------------------------------------------------------------------------------------------------------------|--------------------------------------------------------------------------------------------------------------------------------------------------------------------------------------------------------------------------------------------------------------------------------------------------------------------------------------------------------------------------------------------------------------------------------------------------------|---------------------------------------------------------------------------------------------------------------------------------------------------|------------------------------------------------|--------------------------------------------------------------------------------------------------------------------------------------------------------------------------------------------------------------------------------------------------------------------------------------|
|                                                                                                                 | Leonid L. Bershtein,<br>MD, PhD<br>Sergey A.<br>Sayganov, MD,<br>PhD<br>Anastasia M.<br>Kuzmina-<br>Krutetskaya, MD<br>Elizaveta V.<br>Zbyshevskaya, MD,<br>PhD<br>Nana O.<br>Katamadze, MD,<br>PhD<br>Elena A.<br>Demchenko, MD,<br>PhD<br>Pavel S. Kozlov,<br>MD<br>Vikentiy Y. Kozulin,<br>MD<br>Ekaterina I.<br>Lubinskaya, MD                                                                                                                     | Irina Subbotina<br><br>Victoria Gumerova<br><br>Olga B. Nikolaeva, MD                                                                             | Saint<br>Petersburg<br><br>Saint<br>Petersburg | North-Western State<br>Medical University<br>(50)<br><br>Federal Almazov<br>North-West Medical<br>Research Centre (39)                                                                                                                                                               |
| *Spain (286)<br>Country Leader<br>Jose Luis Lopez-Sendon, MD, PhD<br>Country Coordinator<br>Almudena Castro, MD | Jose Lopez-<br>Sendon, MD, PhD<br>Almudena Castro,<br>MD<br>Elena Refoyo<br>Salicio, MD<br>Gabriela Guzman,<br>MD<br>Gabriel Galeote,<br>MD<br>Silvia Valbuena, MD<br>Jesús Peteiro, MD,<br>PhD<br>María Dolores<br>Martínez-Ruíz, MD<br>Ruth Pérez-<br>Fernández, MD<br>José J Cuenca-<br>Castillo, MD<br>Xacobe Flores-<br>Ríos, MD<br>Óscar Prada-<br>Delgado, MD<br>Gonzalo Barge-<br>Caballero, MD<br>Jose Ramon<br>Gonzalez Juanatey,<br>MD, PhD | Virginia Fernández-<br>Figares, Pharm<br><br>Moisés Blanco-Calvo,<br>PhD<br>Encarnación Alonso-<br>Álvarez, BSc<br>Paula García-<br>González, BSc | Madrid<br><br>A Coruna                         | Hospital La Paz.<br>IdiPaz (118)<br><br>Complejo<br>Hospitalario<br>Universitario A<br>Coruña (CHUAC)<br>Sergas, Department<br>of Cardiology. INIBIC<br>A Coruña. CIBER-<br>CV. Universidad de A<br>Coruña, Spain (112)<br><br>Hospital Clinico<br>Universitario de<br>Santiago (17) |

|                                                                                                                                                                                                                                                                                                                                                                                                                                                                                                                               |                                                                                                                    |                       |                                                                             |
|-------------------------------------------------------------------------------------------------------------------------------------------------------------------------------------------------------------------------------------------------------------------------------------------------------------------------------------------------------------------------------------------------------------------------------------------------------------------------------------------------------------------------------|--------------------------------------------------------------------------------------------------------------------|-----------------------|-----------------------------------------------------------------------------|
| Miguel Souto<br>Bayarri, MD, PhD<br>Virginia Pubull<br>Nuñez, MD<br>Raymundo<br>Ocaranza Sanchez,<br>MD, PhD<br>Belen Cid Alvarez,<br>MD<br>Carlos Peña Gil,<br>MD, PhD<br>Amparo Martinez<br>Monzonis, MD<br>Alessandro Sionis,<br>MD<br>Montserrat Vila<br>Perales, MD<br>Josep Maria Padró,<br>MD<br>Antonio Serra<br>Peñaranda, MD<br>Joan García Picart,<br>MD<br>Antonino Ginel<br>Iglesias, MD<br>Xavier Garcia-Moll<br>Marimon, MD<br>Guillem Pons Lladó,<br>MD<br>Francesc Carreras<br>Costa, MD<br>Vicente Miro, MD | Ana Fernández<br>Martínez, RN                                                                                      | Barcelona             | Hospital de la Santa<br>Creu i Sant Pau (11)                                |
| Jose L Diez, MD<br>Pilar Calvillo, MD<br>F. Marin Ortuño,<br>MD, PhD<br>M. Valdés Chávarri,<br>MD, PhD<br>A. Tello Montolliu,<br>MD, PhD<br>E. Pinar Bermudez,<br>MD, PhD<br>G. De La Morena,<br>MD, PhD                                                                                                                                                                                                                                                                                                                      | Begoña Igual, MD                                                                                                   | Valencia              | Hospital Universitario<br>y Politecnico La Fe<br>(10)                       |
| Montserrat Gracida<br>Blancas, MD                                                                                                                                                                                                                                                                                                                                                                                                                                                                                             | M. Quintana Giner,<br>MD<br>A.I. Romero Anierte,<br>MD<br>JM. Rivera Caravaca,<br>MD                               | Murcia                | HUVA, Hospital<br>Clínico Universitario<br>Virgen De La<br>Arrixaca (8)     |
| Jose Enrique<br>Castillo Luena, MD                                                                                                                                                                                                                                                                                                                                                                                                                                                                                            | Olga Cañavate<br>Sonia Guerrero<br>Silvia Riera<br>Jose Enrique Castillo<br>Luena<br>Maria Lasala<br>Maria Lorenzo | Barcelona<br>Zaragoza | Hospital De Bellvitge<br>(4)<br>Hospital Universitario<br>Miguel Servet (4) |
| Francisco<br>Fernandez-Aviles,<br>MD                                                                                                                                                                                                                                                                                                                                                                                                                                                                                          | Olga Sobrino<br>Alexandra Vazquez                                                                                  | Madrid                | Hospital General<br>Universitario Gregorio<br>Maranon (2)                   |

China (246)



Country Leader  
Lixin Jiang, MD, PhD

|                                  |                                                                                                               |           |                                                               |
|----------------------------------|---------------------------------------------------------------------------------------------------------------|-----------|---------------------------------------------------------------|
| Jiyan Chen, MD                   | Haojian Dong<br>Peiyu He<br>Chunli Xia<br>Junqing Yang<br>Qi Zhong                                            | Guangzhou | Guangdong General Hospital (102)                              |
| Yongjian Wu, MD, PhD             | Yanmeng Tian, MD<br><br>Dongze Li                                                                             | Beijing   | Chinese Academy of Medical Sciences, Fuwai Hospital (17)      |
| Yitong Ma, MD<br>Yining Yang, MD | Xiaomei Li<br>Xiang Ma<br>Zixiang Yu<br>Qian Zhao<br>Chunguang Li                                             | Urumqi    | First Affiliated Hospital of Xinjiang Medical University (15) |
| Zheng Ji, MD                     | Lei Zhang<br>Yu Zhao<br>Bolin Zhu<br>Mulei Chen                                                               | Tangshan  | Tangshan Gongren Hospital (15)                                |
| Xinchun Yang, MD                 | Hongjie Chi<br>Yang Wang<br>Jing Zhang                                                                        | Beijing   | Beijing Chao-yang Hospital, Capital Medical University (12)   |
| Wenhua Lin, MD                   | Rui Jing<br>Jingjing Liu                                                                                      | Tianjing  | TEDA International Cardiovascular Hospital (12)               |
| Hesong Zeng, MD                  | Qiang Zhou, MD<br>Chang Xu, MD<br>Zhuxi Li, MD<br>Junhua Li, MD<br>Luyang Xiong, MD<br>Dan Gao                | Wuhan     | Tongji Medical College (11)                                   |
| Xin Fu, MD                       | Dengke Jiang<br>Ran Leng<br>Xutong Wang<br>Qianqian Yuan<br>Lili Zhang<br>Ziliang Bai<br>Jianhua Li<br>Jie Qi | Zhengzhou | The First Affiliated Hospital of Zhengzhou University (11)    |
| Bin Yang, MD                     | Fei Wang<br>Haitao Wang<br>Bin Yang<br>Zhou Yue<br>Zhulin Zhang                                               | Taiyuan   | Shanxi Cardiovascular Hospital (10)                           |

|                                          |                                                                                     |           |                                                                                        |
|------------------------------------------|-------------------------------------------------------------------------------------|-----------|----------------------------------------------------------------------------------------|
| Songtao Wang, MD                         | Yumei Dong<br>Jiajia Mao<br>Bin Zhang<br>Xihong Li                                  | Qingdao   | Qingdao Fuwai Hospital (8)                                                             |
| Gong Cheng, MD                           | Xiaowei Yao<br>Nier Zhong<br>Ning Zhou<br>Yaping Huang, MS                          | Xian      | Shanxi Provincial People's Hospital (6)                                                |
| Yulan Zhao, MD                           | Panpan Zhou, MS                                                                     | Zhengzhou | The Second Affiliated Hospital of Zhengzhou University (6)                             |
| Xuehua Fang, MD                          | Wei Su                                                                              | Beijing   | Liangxiang Hospital, Beijing Fangshan District (6)                                     |
| Qiutang Zeng, MD                         | Yu Kunwu<br>Yudong Peng<br>Xin Su                                                   | Wuhan     | Wuhan Union Hospital, Tongji Medical College, Huazhong Science and Tech University (3) |
| Xi Su, MD                                | Chen Wang<br>Yunhai Zhao                                                            | Wuhan     | Wuhan Asia Heart Hospital (3)                                                          |
| Qingxian Li, MD                          | Yaming Geng<br>Yanfu Wang                                                           | Jining    | Affiliated Hospital of Jining Medical University (3)                                   |
| Shao-ping Nie, MD, PhD                   | Jing-yao Fan, MD<br>Si-ting Feng, MD, PhD<br>Xiao Wang, MD, PhD<br>Yan Yan, MD, PhD | Beijing   | Beijing Anzhen Hospital (2)                                                            |
| Qin Yu, MD                               | Hui-min Zhang, MD, PhD<br>Lingping Chi<br>Fang Liu<br>Han Chen                      | Dalian    | Affiliated Zhongshan Hospital of Dalian University (2)                                 |
| Jian'an Wang, MD                         | Jun Jiang<br>Huajun Li<br>Jian'an Wang<br>Yechen Han, MM<br>Lihong Xu, RN           | Hangzhou  | The Second Affiliated Hospital Zhejiang University School of Medicine (1)              |
| Shuyang Zhang, MD, PhD<br>Zhenyu Liu, MD | Zhenyu Liu<br>Gang Chen<br>Rongrong Hu                                              | Beijing   | Peking Union Medical College Hospital (1)                                              |

\*Italy (139)  
Country Leader  
Aldo P. Maggioni, MD

|                      |                          |        |
|----------------------|--------------------------|--------|
| Gian Piero Perna, MD | Francesca Pietrucci, PhD | Ancona |
|----------------------|--------------------------|--------|

|                           |                                            |                         |                                                                                                          |
|---------------------------|--------------------------------------------|-------------------------|----------------------------------------------------------------------------------------------------------|
| Marco Marini, MD          |                                            |                         | Cardiology and CCU<br>- Ospedali Riuniti<br>Ancona (54)                                                  |
| Gabriele Gabrielli,<br>MD |                                            |                         |                                                                                                          |
| Stefano Provasoli,<br>MD  | Anna Di Donato                             | Varese                  | Ospedale di Circolo e<br>Fondazione Macchi<br>(23)                                                       |
| Edoardo Verna, MD         |                                            |                         |                                                                                                          |
| Lorenzo Monti, MD         |                                            |                         |                                                                                                          |
| Barbara Nardi, MD         |                                            | Rozzano                 | Humanitas Research<br>Hospital, Rozzano<br>(MI) (17)                                                     |
| Antonio Di Chiara,<br>MD  | Francesca Pezzetta,<br>MD                  | Tolmezzo                | Azienda Servizi<br>Sanitaria n.3 Alto<br>Friuli-Collinare-Medio<br>Friuli (9)                            |
| Andrea Mortara,<br>MD     | Valentina Casali, MD                       | Monza                   | Policlinico di Monza,<br>Monza MB (8)                                                                    |
| Marcello Galvani,<br>MD   |                                            |                         | Ospedale "G.B.<br>Morgagni – L.<br>Pierantoni" Forli<br>(AUSL della<br>Romagna) (8)                      |
| Filippo Ottani, MD        | Chiara Attanasio                           | Forli                   |                                                                                                          |
|                           | Gianpiero Leone, MD                        |                         |                                                                                                          |
| Marco Sicuro, MD          | Francesco Pisano, MD<br>Cristina Bare, BSc | Aosta                   | Ospedale Regionale<br>Umberto Parini (5)                                                                 |
| Paolo Calabro, MD         |                                            |                         |                                                                                                          |
| Tiziana Formisano,<br>MD  | Fabio Fimiani                              | Napoli                  | AORN Dei Colli "V.<br>Monaldi" UOC<br>Cardiologia<br>Università della<br>Campania<br>"L. Vanvitelli" (4) |
| Giuseppe Tarantini,<br>MD | Alberto Barioli, MD                        |                         |                                                                                                          |
| Umberto Cucchini,<br>MD   | Federica Ramani                            | Padua                   | University of Padua-<br>Cardiology Clinic (3)                                                            |
| Anto Luigi Andres,<br>MD  |                                            |                         |                                                                                                          |
| Emanuela Racca,<br>MD     | Fabrizio Rolfo, MD<br>Cecilia Goletto      | Cuneo                   | Azienda Ospedaliera<br>S. Croce e Carle (3)                                                              |
| Carlo Briguori, MD        | Francesca De Micco                         | Naples                  | Clinica Mediterranea<br>(2)                                                                              |
| Roberto Amati, MD         | Stefano Di Marco, MD                       |                         |                                                                                                          |
| William Vergoni,<br>MD    | Martina Tricoli                            | Pescia                  | UO Cardiologia<br>Ospedale SS Cosma<br>e Damiano (2)                                                     |
| Aldo Russo, MD            |                                            |                         |                                                                                                          |
| Raffaele Fanelli,<br>MD   | Massimo Villella, MD                       | San Giovanni<br>Rotondo | IRCCS "Casa<br>Sollevio della<br>Sofferenza" (1)                                                         |

\*Singapore (61)

Country Leader

Harvey Douglas White, MD

Country Coordinator

Caroline Alswailer

Kian-Keong Poh,  
MD  
Ping Chai, MD

Titus Lau, MD

Joshua P. Loh, MD

Edgar L. Tay, MD

Kristine Teoh, MD

Lynette L. Teo, MD

Ching-Ching Ong,  
MD

Raymond C. Wong,  
MD

Poay-Huan Loh,  
MD

Theodoros Kofidis,  
MD

Wan Xian Chan,  
MD

Koo Hui Chan, MD

David Foo, MBBS

Jason Loh Kwok  
Kong, MD

Ching Min Er, MD

Fahim Haider  
Jafary, MD

Terrance Chua, MD

Sik-Yin V Tan, BSc

Winnie C Sia, BSc

Audrey W Leong, BSc

Li Hai Yan, RN

Nasrul Ismail

Min Tun Kyaw

Deborah Yip

Singapore

Singapore

Singapore

Dresden

Stuttgart

National University  
Heart Center  
Singapore (33)

Tan Tock Seng  
Hospital (22)

National Heart Centre  
Singapore (6)

Praxisklinik Herz und  
Gefaesse (29)

Robert-Bosch-  
Krankenhaus (22)

Germany (54)

Country Leader

Rolf Doerr, MD

Rolf Doerr, MD

Juergen Stumpf,  
MD

Klaus Matschke,  
MD, PhD

Gregor Simonis,  
MD, PhD

Clemens T. Kadalie,  
MD

Udo Sechtem, MD

Peter Ong, MD

Dorit Grahl

Franziska Guenther

Kerstin Bonin

Ina Wenzelburger

Susanne  
Gruensfelder, RN

|                             |                                                                        |                                                                    |                    |                                                                                    |
|-----------------------------|------------------------------------------------------------------------|--------------------------------------------------------------------|--------------------|------------------------------------------------------------------------------------|
|                             | P. Christian Schulze, MD, PhD<br>Bjoern Goebel, MD<br>Karsten Lenk, MD |                                                                    | Jena               | University Hospital Jena (2)                                                       |
|                             | Georg Nickenig, MD                                                     | Jan-Malte Sinning, MD<br>Marcel Weber, MD<br>Nikos Werner, MD      | Bonn               | Universitätsklinikum Bonn (1)                                                      |
| Austria (50)                |                                                                        |                                                                    |                    |                                                                                    |
| Country Leaders             |                                                                        |                                                                    |                    |                                                                                    |
| Irene Marthe Lang, MD       |                                                                        |                                                                    |                    |                                                                                    |
| Kurt Huber, MD              |                                                                        |                                                                    |                    |                                                                                    |
|                             | Herwig Schuchlenz, MD<br>Stefan Weikl, MD                              | Gudrun Steinmaurer                                                 | Graz               | LKH Graz West Austria (35)                                                         |
|                             | Irene Marthe Lang, MD                                                  | Max-Paul Winter, MD                                                | Vienna             | Medical University of Vienna, Department of Cardiology (8)                         |
|                             |                                                                        | Tijana, Andric, MD                                                 |                    |                                                                                    |
|                             | Kurt Huber, MD                                                         | Maximilian, Tucharre, MD                                           |                    |                                                                                    |
|                             | Gabriele, Jakl-Kotauschek, MD                                          | Claudia, Wegmayr, MSc<br>Bernhard, Jäger, MD<br>Florian, Egger, MD | Vienna             | Wilhelminen Hospital Vienna (7)                                                    |
| Hungary (49)                |                                                                        |                                                                    |                    |                                                                                    |
| Country Leader              |                                                                        |                                                                    |                    |                                                                                    |
| Matyas Keltai, MD, PhD, DSc |                                                                        |                                                                    |                    |                                                                                    |
|                             |                                                                        | Judit Sebo, MD                                                     |                    |                                                                                    |
|                             | Andras Vertes, MD                                                      | Zoltan Davidovits, MD<br>Laszlone Matics                           | Budapest           | Eszszk- Szent Istvan Hospital (20)                                                 |
|                             | Albert Varga, MD, PhD<br>Geza Fontos, MD                               | Gergely Ágoston, MD<br>Gabor Dekany, MD                            | Szeged<br>Budapest | University of Szeged (12)<br>George Gottsegen National Institute of Cardiology (9) |
|                             | Bela Merkely, MD, PhD, DSc                                             | Andrea Bartykowszki, MD<br>Pal Maurovich-Horvat, MD, PhD, MPH      | Budapest           | Heart and Vascular Center, Semmelweis University (8)                               |
|                             | Gabor Kerecsen, MD                                                     | Agnes Jakal                                                        | Budapest           | Military Hospital, Budapest (1)                                                    |
| Serbia (47)                 |                                                                        |                                                                    |                    |                                                                                    |
|                             | Sasa Hinic, MD, BSc                                                    | Jelena Djokic, MD                                                  | Belgrade           |                                                                                    |

|             |                                                                                                                                                                                                                                                                                             |                                                                                                          |                     |                                                                                                                                                                         |
|-------------|---------------------------------------------------------------------------------------------------------------------------------------------------------------------------------------------------------------------------------------------------------------------------------------------|----------------------------------------------------------------------------------------------------------|---------------------|-------------------------------------------------------------------------------------------------------------------------------------------------------------------------|
|             | Marija Zdravkovic,<br>MD, PhD<br>Vladan Mudrenovic,<br>MD<br>Bogdan Crnokrak,<br>MD<br>Branko D. Beleslin,<br>MD, PhD<br>Nikola N. Boskovic,<br>MD<br>Marija T. Petrovic,<br>MD<br>Milan R. Dobric, MD                                                                                      | Ana D. Djordjevic-<br>Dikic, MD, PhD<br>Vojislav L. Giga, MD,<br>PhD<br>Jelena J. Stepanovic,<br>MD, PhD | Belgrade            | University Hospital<br>Center Bezanijska<br>Kosa (13)<br><br>Faculty of Medicine,<br>University of<br>Belgrade; Cardiology<br>Clinic, Clinical Center<br>of Serbia (10) |
|             | Zeljko Z. Markovic,<br>MD, PhD<br>Ana S. Mladenovic,<br>MD, PhD                                                                                                                                                                                                                             | Lazar Velicki, MD                                                                                        |                     | Institute of<br>Cardiovascular<br>Diseases Vojvodina,<br>Sremska Kamenica,<br>Serbia and Faculty of<br>Medicine, University<br>of Novi Sad (9)                          |
|             | Nada Cemerlic-<br>Adjic, MD                                                                                                                                                                                                                                                                 | Ljiljana Pupic                                                                                           | Sremska<br>Kamenica |                                                                                                                                                                         |
|             | Goran Davidović,<br>MD, PhD<br>Rada Vučić, MD                                                                                                                                                                                                                                               | Stefan M. Simović,<br>MD                                                                                 | Kragujevac          | Clinical Center<br>Kragujevac (7)                                                                                                                                       |
|             | Milica Nikola<br>Dekleva, MD PhD                                                                                                                                                                                                                                                            | Miroslav Stevo<br>Martinovic, MD<br>Gordana Stevanovic                                                   | Belgrade            | University Clinical<br>Hospital Zvezdara (6)                                                                                                                            |
|             | Goran Stankovic,<br>MD                                                                                                                                                                                                                                                                      | Milan Dobric                                                                                             | Belgrade            | Clinical Center of<br>Serbia (1)                                                                                                                                        |
|             | Svetlana<br>Apostolovic, MD                                                                                                                                                                                                                                                                 | Sonja Salinger<br>Martinovic<br>Dragana Stanojevic                                                       | Nis                 | Clinic for<br>Cardiovascular<br>Diseases, Clinical<br>Center Nis (1)                                                                                                    |
| Mexico (46) | Jorge Escobedo,<br>MD<br>Rubén Baleón-<br>Espinosa, MD<br>Arturo S Campos-<br>Santaolalla, MD<br>Elihú Durán-Cortés,<br>MD<br>José M Flores-<br>Palacios, MD<br>Andrés García-<br>Rincón, MD<br>Moisés Jiménez-<br>Santos, MD<br>Joaquín V Peñafiel,<br>MD<br>José A Ortega-<br>Ramírez, MD | Ramon de Jesús-<br>Pérez, RN                                                                             | Benito Juarez       | Instituto Mexicano del<br>Seguro Social (35)                                                                                                                            |

|                                            |                                                                    |                                                                                                        |                     |                                                         |
|--------------------------------------------|--------------------------------------------------------------------|--------------------------------------------------------------------------------------------------------|---------------------|---------------------------------------------------------|
|                                            | Aquiles Valdespino-Estrada, MD                                     | María Fernanda Canales Brassetti, MD<br>Diego Adrián Vences Anaya, MD<br>María Pérez García            |                     |                                                         |
|                                            | Erick Alexánderson Rosas, MD                                       | Isabel Estela Carvajal Juárez, MD<br>Magdalena Madero Rovalo, MC<br>Erick Donato Morales Rodríguez, MD | Mexico City         | Instituto Nacional de Cardiología "Ignacio Chávez" (11) |
| Australia (45)                             |                                                                    |                                                                                                        |                     |                                                         |
| Country Leaders                            |                                                                    |                                                                                                        |                     |                                                         |
| Joseph B. Selvanayagam, MBBS (Hons), DPhil |                                                                    |                                                                                                        |                     |                                                         |
| Jamie Rankin, MBBS ( <i>past</i> )         |                                                                    |                                                                                                        |                     |                                                         |
| Country Coordinator                        |                                                                    |                                                                                                        |                     |                                                         |
| Deirdre Murphy                             |                                                                    |                                                                                                        |                     |                                                         |
|                                            | Joseph B. Selvanayagam, MBBS (Hons), DPhil<br>Majo X. Joseph, MBBS | Sau Lee, PhD<br><br>Prince Thomas, RN<br><br>Melissa D Chaplin, RN                                     | Adelaide            | Flinders Medical Centre (30)                            |
|                                            | Suku T. Thambar, MBBS                                              | Stephanie C Boer, B Biotechnology (Honours)<br>Jeanette K. Stansborough, RN<br>Marilyn Black, RN       | New Lambton Heights | John Hunter Hospital (8)                                |
|                                            | John F. Beltrame, MD                                               | Michelle M. Bonner, B. Nursing<br>Kim F. Ireland, RN<br>Clare Venn-Edmonds, RN                         | Woodville South     | The Queen Elizabeth Hospital (5)                        |
|                                            | Graham S. Hillis, PhD                                              |                                                                                                        | Perth               | Royal Perth Hospital (2)                                |
| France (42)                                |                                                                    |                                                                                                        |                     |                                                         |
| Country Leader                             |                                                                    |                                                                                                        |                     |                                                         |
| Philippe-Gabriel Steg, MD                  |                                                                    |                                                                                                        |                     |                                                         |
| Country Coordinators                       |                                                                    |                                                                                                        |                     |                                                         |
| Helene Abergel                             |                                                                    |                                                                                                        |                     |                                                         |
| Jean-Michel Juliard                        |                                                                    |                                                                                                        |                     |                                                         |
|                                            | Christophe Thuaire, MD                                             | Corine Thobois, RN<br>Emilie Tachot, RN                                                                | Chartres            | C.H. Louis Pasteur (21)                                 |

|                   |                             |                                   |                        |                                                     |
|-------------------|-----------------------------|-----------------------------------|------------------------|-----------------------------------------------------|
|                   | Téodora Dutoiu, MD          | Christophe Laure, RN              |                        |                                                     |
|                   | Philippe Gabriel Steg, MD   | Christel Vassaliere, RN           |                        |                                                     |
|                   | Jean-Michel Juliard, MD     | Helene Abergel, MSc               | Paris                  | Bichat Hospital (9)                                 |
|                   | Michel S. Slama, MD         | Axelle Fuentes, MSc               | Clamart Cedex          | Antoine-Beclere Hospital (5)                        |
|                   | Rami El Mahmoud, MD         | Ludivine Eliahou, MD              | Boulogne               | Ambroise Pare Hospital (2)                          |
|                   | Eric Nicollet, MD           | Olivier Dubourg, MD               | Corbeil-Essonnes Cedex | Centre Hospitalier Sud Francilien (2)               |
|                   | Pascal Goube, MD            | Patricia Brito                    | Grenoble               | Grenoble University Hospital (2)                    |
|                   | Gilles Barone-Rochette, MD  | Gilles Barone-Rochette            | Angers Cedex 9         | Centre Hospitalier Universitaire d'Angers (1)       |
|                   | Alain Furber, MD            | Charles Cornet, MD, PhD           |                        |                                                     |
|                   | Loïc Bière, MD              | Jeremy Rautureau, MD, PhD         |                        |                                                     |
| Lithuania (39)    |                             | Agne Juceviciene, MD              |                        |                                                     |
|                   |                             | Irma Kalibataite-Rutkauskiene, MD |                        |                                                     |
|                   |                             | Laura Keinaite                    |                        |                                                     |
|                   | Aleksandras Laucevicius, MD | Monika Laukyte                    | Vilnius                | Vilnius University Hospital Santariskes Clinic (39) |
|                   | Jelena Celutkiene, MD       | Gelmina Mikolaitiene              |                        |                                                     |
|                   |                             | Akvile Smigelskaite, MD           |                        |                                                     |
|                   |                             | Ilona Tamasauskiene, MD           |                        |                                                     |
|                   |                             | Agne Urboniene, MD                |                        |                                                     |
| *Netherlands (37) |                             |                                   |                        |                                                     |
|                   | Elvin Kedhi MD, PhD         |                                   |                        |                                                     |
|                   | Jorik Timmer, MD            | Ilse Bouwhuis                     | Zwolle                 | Isala Klinieken (25)                                |
|                   | Rik Hermanides, MD          | Lia Nijmeijer                     |                        |                                                     |
|                   | Eliza Kaplan, MD            |                                   |                        |                                                     |
|                   | Robert K. Riezebos, MD, PhD |                                   |                        |                                                     |
|                   | Pouneh Samadi, MD           | Jeannette, J. M. Schoep, RN       | Amsterdam              | Cardio Research Hartcentrum OLVG (11)               |
|                   | Elise van Dongen, MD        | Elisabeth, M. Janzen, RN          |                        |                                                     |
|                   | Sander R. Niehe, MD         |                                   |                        |                                                     |
|                   | Harry Suryapranata, MD      | Sandra Ahoud                      | Nijmegen               | Radboudumc (1)                                      |



|                                      |                                      |                               |                                                                              |                                 |
|--------------------------------------|--------------------------------------|-------------------------------|------------------------------------------------------------------------------|---------------------------------|
| Portugal (33)                        | Stijn van Vugt, MD,<br>PhD           |                               |                                                                              |                                 |
|                                      | Ruben Ramos, MD                      |                               |                                                                              |                                 |
|                                      | Duarte Cacela, MD                    |                               |                                                                              |                                 |
|                                      | Ana Santana, MD                      |                               |                                                                              |                                 |
|                                      | Antonio Fiarresga,<br>MD             |                               |                                                                              |                                 |
|                                      | Lidia Sousa, MD                      |                               |                                                                              |                                 |
|                                      | Hugo Marques, MD                     |                               |                                                                              |                                 |
|                                      | Lino Patricio, MD                    | Mafalda Selas                 |                                                                              |                                 |
|                                      | Luis Bernanrdes,<br>MD               | Filipa Silva                  |                                                                              |                                 |
|                                      | Pedro Rio, MD                        | Cláudia Freixo                | Lisbon                                                                       | Hospital de Santa<br>Marta (25) |
|                                      | Ramiro Carvalho,<br>MD               |                               |                                                                              |                                 |
|                                      | Rui Ferreira, MD                     |                               |                                                                              |                                 |
|                                      | Tiago Silva, MD                      |                               |                                                                              |                                 |
|                                      | Ines Rodrigues, MD                   |                               |                                                                              |                                 |
|                                      | Pedro Modas, MD                      |                               |                                                                              |                                 |
|                                      | Guilherme Portugal,<br>MD            |                               |                                                                              |                                 |
|                                      | Jose Fragata, MD                     |                               |                                                                              |                                 |
|                                      | Fausto J. Pinto,<br>PhD              | Inês Zimbarra Cabrita,<br>PhD |                                                                              |                                 |
|                                      | Miguel Nobre<br>Menezes, MD          | Andreia Rocha, MSc            |                                                                              |                                 |
| Guilhermina<br>Cantinho Lopes,<br>MD | Francisca Patuleia<br>Figueiras, PhD |                               | Santa Maria<br>University Hospital,<br>Cardiology<br>Department, CHLN<br>(6) |                                 |
| Ana Gomes<br>Almeida, PhD            | Andreia Coelho, BSc                  | Lisbon                        |                                                                              |                                 |
| Pedro Canas Silva,<br>MD             | Marta Capinha                        |                               |                                                                              |                                 |
| Angelo Nobre, MD                     | Maria Inês Caetano                   |                               |                                                                              |                                 |
| Ana Rita Francisco,<br>MD            | Susana Silva                         |                               |                                                                              |                                 |
| Nuno Ferreira, MD                    |                                      |                               |                                                                              |                                 |
| Ricardo L. Lopes,<br>MD              |                                      | Vila Nova de<br>Gaia          | Centro Hospitalar de<br>Vila Nova de<br>Gaia/Espinho, EPE<br>(2)             |                                 |
| Argentina (29)                       |                                      |                               |                                                                              |                                 |
| Country Leader                       |                                      |                               |                                                                              |                                 |
| Rafael Diaz, MD ( <i>past</i> )      |                                      |                               |                                                                              |                                 |
|                                      | Luis Guzman, MD                      | Veronica Tinnirello           | Cordoba                                                                      | Instituto Medico<br>DAMIC (11)  |

|                          |                                         |                        |                                 |                                                     |
|--------------------------|-----------------------------------------|------------------------|---------------------------------|-----------------------------------------------------|
|                          | Julio César Figal, MD                   |                        |                                 |                                                     |
|                          | Oscar Méndiz, MD                        |                        | Ciudad Autónoma de Buenos Aires | Fundación Favaloro (10)                             |
|                          | Claudia Cortés, MD                      | Matías Nicolás Mungo   |                                 |                                                     |
|                          | Roberto René Favaloro, MD               |                        |                                 |                                                     |
|                          | Carlos Alvarez, MD                      | Marina Garcia          | Bahia Blanca                    | Hospital Italiano Regional del Sur Bahía Blanca (3) |
|                          | Javier Courtis, MD                      |                        |                                 |                                                     |
|                          | Gabriela Zeballos, MD                   | Valeria Godoy          | Cordoba                         | Clinica Romagosa and Clinica De La Familia (2)      |
|                          | Lilia Schiavi, MD                       | Maria Victoria Actis   | Cordoba                         | Clinica Del Prado (2)                               |
|                          | Mariano Rubio, MD                       | Graciela Scaro, MD     | Cordoba                         | Clínica Privada Vélez Sarsfield (1)                 |
| *New Zealand (28)        |                                         |                        |                                 |                                                     |
| Country Leader           |                                         |                        |                                 |                                                     |
| Harvey Douglas White, MD |                                         |                        |                                 |                                                     |
| Country Coordinator      |                                         |                        |                                 |                                                     |
| Caroline Alswailer       |                                         |                        |                                 |                                                     |
|                          | Gerard Patrick Devlin, MD               | Liz Low, RN            |                                 |                                                     |
|                          | Raewyn Fisher, MD                       | Jayne Scales, RN       | Hamilton                        | Waikato Hospital (22)                               |
|                          |                                         | Kirsty Abercrombie, RN |                                 |                                                     |
|                          | Ralph Alan Huston Stewart, MCCChB, MD   | Leah Howell, RN        |                                 |                                                     |
|                          | Harvey Douglas White, MD                | Cathrine Patten, RN    | Auckland                        | Auckland City Hospital (6)                          |
|                          | Jocelyne Benatar, MD                    |                        |                                 |                                                     |
| *Macedonia (28)          |                                         |                        |                                 |                                                     |
|                          | Sasko Kedev, MD, PhD                    |                        | Skopje                          | University Clinic of Cardiology (28)                |
|                          | Irena Peovska Mitevaska, MD, PhD        |                        |                                 |                                                     |
|                          | Elizabeta Srbinovska Kostovska, MD, PhD |                        |                                 |                                                     |
|                          | Hristo Pejkov, MD, PhD                  |                        |                                 |                                                     |
| *Sweden (23)             |                                         |                        |                                 |                                                     |
| Country Leader           |                                         |                        |                                 |                                                     |
| Claes Held, MD, PhD      |                                         |                        |                                 |                                                     |
|                          | Claes Held, MD, PhD                     |                        | Uppsala                         | Uppsala University (18)                             |
|                          | Kai Eggers, MD, PHhD                    |                        |                                 |                                                     |

|                                |                                                                                                                                                     |                                                                                                 |                       |                                                             |
|--------------------------------|-----------------------------------------------------------------------------------------------------------------------------------------------------|-------------------------------------------------------------------------------------------------|-----------------------|-------------------------------------------------------------|
|                                | Gunnar Frostfelt, MD, PhD<br>Nina Johnston, MD, PhD<br>Maciej Olsowka, MD<br>Axel Åkerblom, MD, PhD<br>Inga Soveri, MD, PhD<br>Johannes Aspberg, MD | Christina Björklund, RN<br>Maria Andreasson, RN<br>Marie Essermark, RN<br><br>Liselotte Persson | Stockholm             | Karolinska Institutet at Danderyd Hospital (5)              |
| Israel (15)                    |                                                                                                                                                     |                                                                                                 |                       |                                                             |
| Country Leaders                |                                                                                                                                                     |                                                                                                 |                       |                                                             |
| Rafael Beyar, MD, MD, DSc, MPH |                                                                                                                                                     |                                                                                                 |                       |                                                             |
| Tali Sharir, MD                |                                                                                                                                                     |                                                                                                 |                       |                                                             |
| Country Coordinator            |                                                                                                                                                     |                                                                                                 |                       |                                                             |
| Eugenia Nikolsky, MD           |                                                                                                                                                     |                                                                                                 |                       |                                                             |
|                                | Tali Sharir, MD<br>Dan Elian, MD<br>Arthur Kerner, MD<br>Samia Massalha, MD                                                                         | Or Harel, MA<br>Margalit Bentzvi<br>Ludmila Helmer                                              | Tel-Aviv<br><br>Haifa | Assuta Medical Centers (9)<br><br>Rambam Medical Center (6) |
| Japan (14)                     |                                                                                                                                                     |                                                                                                 |                       |                                                             |
| Country Leader                 |                                                                                                                                                     |                                                                                                 |                       |                                                             |
| Shun Kohsaka, MD               |                                                                                                                                                     |                                                                                                 |                       |                                                             |
|                                | Keiichi Fukuda, MD, PhD<br>Shun Kohsaka, MD                                                                                                         | Ikuko Ueda, PhD<br>Jun Fujita, MD<br>Akemi Furukawa, RN                                         | Shinjuku-ku           | Keio University (7)                                         |
|                                | Satoshi Yasuda, MD, PhD                                                                                                                             | Kanae Hirase, RN<br>Toshiyuki Nagai, MD, PhD<br>Fumiyuki Otsuka, MD, PhD                        | Suita-shi             | National Cerebral and Cardiovascular Center (4)             |
|                                | Shigeyuki Nishimura, MD                                                                                                                             | Shintaro Nakano                                                                                 | Hidaka                | Saitama Medical University (3)                              |
| *Belgium (7)                   |                                                                                                                                                     |                                                                                                 |                       |                                                             |
| Country Leader                 |                                                                                                                                                     |                                                                                                 |                       |                                                             |
| Frans Van de Werf, MD, PhD     |                                                                                                                                                     |                                                                                                 |                       |                                                             |
| Country Coordinator            |                                                                                                                                                     |                                                                                                 |                       |                                                             |
| Kaatje Goetschalckx, MD        |                                                                                                                                                     |                                                                                                 |                       |                                                             |

|                          |                                                                                                  |                                                                 |             |                                                            |
|--------------------------|--------------------------------------------------------------------------------------------------|-----------------------------------------------------------------|-------------|------------------------------------------------------------|
|                          | Kaatje<br>Goetschalckx, MD<br>Frans Van de Werf,<br>PhD, MD<br>Kathleen Claes,<br>PhD, MD        | Valerie Robesyn                                                 | Leuven      | University Hospital<br>Leuven (7)                          |
| *Taiwan (7)              |                                                                                                  |                                                                 |             |                                                            |
| Country Leader           |                                                                                                  |                                                                 |             |                                                            |
| Harvey Douglas White, MD |                                                                                                  |                                                                 |             |                                                            |
| Country Coordinator      |                                                                                                  |                                                                 |             |                                                            |
| Caroline Alsweiler       |                                                                                                  |                                                                 |             |                                                            |
|                          | Chung-Lieh Hung,<br>MD<br>Chun-Ho Yun, MD                                                        |                                                                 |             |                                                            |
|                          | Charles Jia-Yin<br>Hou, MD<br>Jen-Yuan Kuo, MD                                                   |                                                                 |             |                                                            |
|                          | Hung-I Yeh, MD,<br>PhD<br>Ta-Chuan Hung,<br>MD<br>Jiun-Yi Li , MD, PhD                           |                                                                 |             |                                                            |
|                          | Chen-Yen Chien,<br>MD, PhD<br>Cheng-Ting Tsai,<br>MD<br>Chun-Chieh Liu,<br>MD<br>Fa-Chang Yu, MD | Yi-Hsuan Yang                                                   | Taipei City | Mackay Memorial<br>Hospital (7)                            |
|                          | Yueh-Hung Lin, MD                                                                                |                                                                 |             |                                                            |
|                          | Wei-Ren Lan, MD                                                                                  |                                                                 |             |                                                            |
|                          | Chih-Hsuan Yen,<br>MD<br>Jui-Peng Tsai, MD                                                       |                                                                 |             |                                                            |
|                          | Kuo-Tzu Sung, MD                                                                                 |                                                                 |             |                                                            |
| *South Africa (7)        |                                                                                                  |                                                                 |             |                                                            |
|                          | Mpiko Ntsekhe, MD                                                                                |                                                                 |             |                                                            |
|                          | Shaheen Pandie,<br>MD<br>Charle A Viljoen,<br>MD<br>Marianne De<br>Andrade, MD                   | Constance Philander<br>(Nee Talliard), ND<br>Noloyiso Mtana, RN | Cape Town   | Groote Schuur<br>Hospital / University<br>of Cape Town (7) |
| *Switzerland (7)         |                                                                                                  |                                                                 |             |                                                            |
| Country Leader           |                                                                                                  |                                                                 |             |                                                            |

|                      |                                                                                                                                                            |                                                                     |                           |                                                                                                                         |
|----------------------|------------------------------------------------------------------------------------------------------------------------------------------------------------|---------------------------------------------------------------------|---------------------------|-------------------------------------------------------------------------------------------------------------------------|
| Aldo P. Maggioni, MD | Tiziano Moccetti, MD<br>M.Grazia Rossi, MD                                                                                                                 | Adriana Anesini, RN<br>Simona Maspoli, RN<br>Manuela Mombelli, RN   | Lugano                    | Cardiocentro (7)                                                                                                        |
| Egypt (6)            | Magdy Abdelhamid, MD<br>Ahmed Adel, MD<br>Ahmed Kamal, MsC                                                                                                 | Hossam Mahrous, MD<br>Sameh El Kaffas, MD<br>Hussien El Fishawy, MD | Ahmed Talaat, MD<br>Cairo | Cairo University (6)                                                                                                    |
| Romania (5)          | Calin Pop, MD, PhD<br>Matei Claudia, MD, PhD<br>Bogdan A. Popescu, MD, PhD<br>Carmen Ginghina, MD, PhD<br>Dan Deleanu, MD, PhD<br>Vlad A. Iliescu, MD, PhD | Monica Rosca, MD, PhD<br>Carmen C. Beladan, MD, PhD                 | Bucharest<br>Bucharest    | Emergency County Hospital Baia Mare (4)<br>Emergency Institute of Cardiovascular Diseases "Prof. Dr. C. C. Iliescu" (1) |
| *Saudi Arabia (5)    | Mouaz H. Al-Mallah, MD MSc<br>Ahmed Aljzeeri, MD<br>Hani Najm, MD<br>Ali Alghamdi, MD                                                                      | Sarah Zahrani, RN                                                   | Central Province          | King AbdulAziz Cardiac Center (5)                                                                                       |
| *Peru (4)            | Walter Enrique Mogrovejo Ramos, MD                                                                                                                         | Marco Antonio Monsalve Davila, RN                                   | Mirafloes                 | Instituto Neuro Cardiovascular De Las Americas (4)                                                                      |
| Thailand (3)         | Country Leader<br>Harvey Douglas White, MD<br>Country Coordinator<br>Caroline Alswailer                                                                    | Srun Kuanprasert, MD                                                | Chiang Mai                |                                                                                                                         |

|                                                                                                                                                                                                                                                                                                                 |                                                                                  |         |                                              |
|-----------------------------------------------------------------------------------------------------------------------------------------------------------------------------------------------------------------------------------------------------------------------------------------------------------------|----------------------------------------------------------------------------------|---------|----------------------------------------------|
| Arintaya<br>Prommintikul, MD<br>Weerachai<br>Nawarawong, MD<br>Surin<br>Woragidpoonpol,<br>MD<br>Thitipong<br>Tepsuwan, MD<br>Noppon<br>Taksaudom, MD<br>Chataroon<br>Rimsukcharoenchai<br>, MD<br>Juntima<br>Euathrongchit, MD<br>Yutthaphan<br>Wannasopha, MD<br>Sukit Yamwong,<br>MD<br>Piyamitr Sritara, MD | Supatchara<br>Khwakhong, RN<br>Anong Chaayasri, RN                               |         |                                              |
|                                                                                                                                                                                                                                                                                                                 | Warangkana Mekara,<br>RN<br>Supap Kulthawong,<br>RN<br>Anong Amaritakomol,<br>RN |         | Maharaj Nakorn<br>Chiang Mai Hospital<br>(2) |
| Suthara<br>Aramcharoen, MD<br>Krissada Meemuk,<br>MD                                                                                                                                                                                                                                                            | Pachara Panpunuan,<br>RN                                                         | Bangkok | Ramathibodi Hospital<br>(1)                  |

\*Malaysia (2)

Country Leader

Harvey Douglas White, MD

Country Coordinator

Caroline Alswailer

|                                                                                 |                                                                                                   |              |                                |
|---------------------------------------------------------------------------------|---------------------------------------------------------------------------------------------------|--------------|--------------------------------|
| Ahmad Khairuddin,<br>MD<br>Hafidz Abd Hadi,<br>MD<br>Shaiful Azmi<br>Yahaya, MD | Noor Syamira<br>Mokhtar, RN<br>Nor Asiah Basri, RN<br><br>Irni Yusnida, RN<br><br>Humayrah Hashim | Kuala Lumpur | Institut Jantung<br>Negara (2) |
|---------------------------------------------------------------------------------|---------------------------------------------------------------------------------------------------|--------------|--------------------------------|

\* Countries participated in Economics Quality of Life (EQoL) Questionnaires

\*\*This site received one participant in transfer that was randomized at another site

### III. Supplementary Methods

#### Required Quality Metrics for Participating Sites

A site must meet the following criteria to qualify for participation in the ISCHEMIA trial, as determined by site-reported data collected via the survey qualification process:

1. Access to a Stress Imaging Modality- Must be able to transmit images digitally
2. Access to a CT Scanner- Must be able to produce >64 slices and must perform 1 scan/week
3. PCI site and operator requirements are as follows:
  - a. PCI Site Criteria
    - i. Must be willing to establish an ISCHEMIA trial HEART TEAM of cardiovascular interventionalists and surgeons that can evaluate randomized patients on an ongoing basis in a collaborative, multidisciplinary fashion
    - ii. Average number of annual PCI cases over the last 3 years for the primary PCI location  $\geq 400$ /year
    - iii. EXCLUDING CASES WITH TOTAL OCCLUSION AND STEMI:
      1. Average procedural success rate over the last 3 years  $>95\%$ :
      2. Average rate of emergency CABG over the last 3 years  $<0.6\%$ :
      3. Average rate of in-hospital mortality over the last 3 years  $<1.5\%$
  - b. PCI Operator Criteria
    - i. Average number of annual PCI cases for the operator over the last 3 years  $\geq 75$  cases/year. If the volume is  $<75$  per year, total number of lifetime PCI cases must be  $>1500$  cases:
4. CABG Site and Operator requirements are as follows:
  - a. CABG Site Criteria
    - i. Average annual total procedures with CABG over the last 3 years  $\geq 125$ /year
    - ii. Average annual cardiac surgical procedures (open heart) over the last 3 years  $\geq 300$ /year
    - iii. AND [either 1, 2 or 3]
      1. Non-risk adjusted in-hospital mortality for all isolated CABG procedures over the last 3 years  $\leq 3.0\%$
      2. Non-risk adjusted in-hospital mortality for isolated elective CABG procedures over the last 3 years  $\leq 2.0\%$
      3. (For US Sites participating in STS Registry): Risk adjusted operative mortality for isolated CABG procedures over the last 3 years  $\leq 2.7\%$
  - b. CABG Operator Criteria:
    - i. Average number of annual total procedures with CABG for the surgeon over the last 3 years  $\geq 75$  cases/year
    - ii. Lifetime total procedures with CABG  $\geq 750$  cases

Sites that qualified for participation in the EXCEL trial<sup>1</sup> qualified for participation in ISCHEMIA. [<sup>1</sup>Stone GW, Sabik JF, Serruys PW, et al. Everolimus-Eluting Stents or Bypass Surgery for Left Main Coronary Disease. N Engl J Med 2017;376:1089.]

## Guidelines for Sites on How to Achieve Revascularization of All Ischemic Territories

These revascularization guidelines apply to participants randomized to the invasive management strategy and participants in the conservative management strategy who undergo cardiac catheterization due to failure of guideline-based medical therapy, such as those who experience a myocardial infarction (MI), hospitalization for unstable angina, resuscitated cardiac arrest, or hospitalization for heart failure, or who have angina that is refractory to maximal medical therapy. In such participants in every case revascularization should be performed using the principles of revascularization therapy as outlined below.

Each site should have a “Heart Team” which includes a non-invasive/imaging cardiologist(s) (or a general internist), an interventional cardiologist, and a cardiovascular surgeon. The heart team will collectively decide on the method of revascularization for each ISCHEMIA participant randomized to the invasive strategy.

### 1. Revascularization Strategy

Revascularization will be performed based on findings from the diagnostic catheterization as well as other relevant clinical information. While the selection of percutaneous coronary intervention (PCI) vs. coronary artery bypass graft surgery (CABG)—or medical therapy only in cases of non-obstructed coronary arteries, diffuse small vessel disease, etc.—will be left to the discretion of the treating team per local standards and expertise. Several general principles should be followed:

- The revascularization modality selected should have the greatest likelihood to safely and effectively relieve significant ischemia in all viable myocardial territories of at least moderate size. In general, non-ischemic and/or non-viable myocardium, as demonstrated by ancillary imaging, will not be a target for revascularization
- Decisions regarding viability testing and revascularization decisions determined by such testing should be based on routine clinical practice

#### 1a. Revascularization by PCI

PCI should be performed with a goal of relieving all areas of significant ischemia (i.e., ischemia that would be detected by noninvasive imaging or by fractional flow reserve (FFR) testing in the catheterization laboratory).

For participants with ischemia in the lesion distribution on noninvasive testing or by FFR:

- a. PCI is recommended for lesions with visually estimated diameter stenosis (DS)  $\geq 50\%$  and a reference vessel diameter of  $\geq 2.25$  mm
- b. PCI is not recommended for lesions with visually estimated DS  $< 50\%$  and a reference vessel diameter of  $\geq 2.25$  mm unless FFR  $\leq 0.80$
- c. The decision whether to perform PCI of a lesion with reference vessel diameter  $< 2.25$  mm, which is causing ischemia, should be individualized according to the judgment of the operator. However, in general PCI is recommended if it supplies at least a moderate amount of myocardium

For participants with no ischemia on noninvasive testing in the distribution of a stenotic artery:



PCI is recommended for lesions with visually estimated DS  $\geq 80\%$  and a reference vessel diameter of  $\geq 2.25$  mm

- a. PCI is not recommended for lesions with visually estimated DS  $< 80\%$  and a reference vessel diameter of  $\geq 2.25$  mm unless FFR  $\leq 0.80$
- b. If FFR is not available, intravascular ultrasound (IVUS) criteria of minimal luminal area  $\leq 4$  mm<sup>2</sup> + plaque burden  $\geq 60\%$  should be applied
- c. Although FFR (strongly preferred) or IVUS is required to guide PCI decisions of lesions with DS  $< 80\%$  with no evidence of ischemia with noninvasive testing, there may be situations in which PCI is acceptable without such testing (e.g. ruptured plaque)

#### 1b. Revascularization by CABG

Anatomy (% stenosis and epicardial coronary artery architecture) has typically guided decision-making in surgical revascularization. Given the absence of intraoperative FFR or IVUS, the assessment of ischemic regions must rely on preoperative testing and FFR/IVUS at diagnostic catheterization. Anatomically, all coronary arteries with  $\geq 70\%$  stenosis and  $> 1.5$  mm in diameter should be revascularized unless these territories are known not to be ischemic on the basis of other noninvasive or invasive testing. Functionally, all ischemic myocardial areas (subtended by coronary arteries with visually assessed  $\geq 50\%$  diameter stenosis) should be grafted. For important left main stenosis, all participants should have at least one bypass graft to the left anterior descending coronary artery system and a second graft to circumflex coronary artery system.

Prior to performing PCI or CABG, the Heart Team should review each participant and determine the strategy of revascularization for the individual participant. The strategy will include a plan of which lesions/vessels will be attempted based on the considerations described above.

#### 2. Complete “Ischemic Revascularization” vs. Complete “Anatomic Revascularization”

Complete anatomic revascularization is defined for PCI as revascularization of all vessels  $\geq 2.25$  mm reference vessel diameter with a DS  $\geq 70\%$ ; for CABG, revascularization of all vessels  $> 1.5$  mm reference vessel diameter with a DS  $\geq 70\%$ .

Complete ischemic revascularization is defined for PCI as revascularization of all vessels  $\geq 2.25$  mm that have been demonstrated to result in ischemia by noninvasive imaging or FFR (see above); for CABG, grafting of all areas of significant ischemia based on preoperative testing or FFR of intermediate lesions at diagnostic catheterization, as well as making every effort to revascularize areas subtended by occluded coronaries unless the myocardium is demonstrated to be nonviable.

The goal of revascularization in ISCHEMIA is complete ischemic revascularization rather than complete anatomic revascularization. For assessment of the completeness of ischemic revascularization, physiologic significance “trumps” anatomic severity. For example, if the angiographic DS is  $\geq 70\%$  but the FFR is  $> 0.80$ , that lesion does not require treatment for ischemic revascularization to be considered to be complete, however, may be indicated for bypass grafting based on surgical anatomic criteria and judgment.

### 3. Role of the Angiographic Core Lab

The angiographic core lab will analyze coronary angiograms according to the definitions of complete ischemic revascularization and complete anatomic revascularization for all participants randomized to the invasive strategy.

Following CABG or PCI, the angiographic core lab will determine the extent of revascularization by review of post-procedural angiograms and other relevant clinical data including operative notes, which will be routinely submitted for evaluation.

The angiographic core lab will also analyze cases requested by the Clinical Events Committee or Clinical Coordinating Center related to suspected outcome events.

### 4. Criteria to Select PCI vs. CABG

In general, the decision between PCI and CABG will be determined according to local hospital standards and practices. Guidelines from professional societies and appropriateness criteria should be incorporated into the decision process.<sup>1-3</sup> It is desirable for the study's Heart Team (interventional cardiologist and cardiac surgeon) to discuss each case after diagnostic angiography to reach a consensus on the best revascularization technique. The overriding goal is to select the approach that the heart team believes will provide the most complete relief of ischemia with the lowest chance of procedure-related death, MI, or stroke.

It is recognized, however, that in some cases of non-complex coronary artery disease that the performance of "ad hoc" PCI after diagnostic angiography may be preferred by participants and physicians.<sup>4, 5</sup> Whenever possible, the Heart Team should record an opinion on each participant regarding the best mode of revascularization, reaching a consensus where possible, and recording disagreement if not possible.

In general, the following principles should be followed when selecting between PCI and CABG:

a. For participants with 1- or 2-vessel disease, revascularization may be performed by either PCI or CABG depending on the complexity of the coronary anatomy and other considerations:

- If PCI is selected, ad hoc PCI is permitted if the anticipated success rate is >95% with major complication rate <1% (and renal function is normal)
- Staged PCI for 2-vessel disease should be considered if the estimated glomerular filtration rate is <60 ml/min
- CABG is recommended for severe diffuse disease, marked calcification or vessel tortuosity, complex branch lesions, complex chronic total occlusions supplying viable myocardium, or situations otherwise unfavorable for PCI
- For both PCI and CABG, every attempt will be made for the selected revascularization procedure to be performed within one week following randomization. While this will not always be feasible, the target in all cases is for Cath and revascularization (if it is to occur) to be performed within 30 days

b. For participants with 3-vessel or unprotected left main disease:

- Ad hoc PCI is strongly discouraged and is not permitted in participants with unprotected left main (LM) disease. The catheterization procedure should be terminated after the diagnostic portion is complete. A SYNTAX score should be calculated, and the case

discussed by the Heart Team and participant to reach a consensus decision as to whether PCI vs. CABG is most appropriate for that particular participant

- The SYNTAX score has been found to be prognostically useful in selecting patients with 3-vessel and LM disease who may have comparable or even improved outcomes with PCI utilizing drug-eluting stents compared to CABG. Conversely, the two- and three-year outcomes for intermediate and high SYNTAX score patients are significantly better with CABG 6-8 9
- In the SYNTAX study, approximately a third of patients with 3-vessel and LM disease were referred for CABG because of advanced disease. In the remaining patients—felt to be suitable for CABG or PCI by the interventionalist/surgeon team, and depending on local expertise and experience—as a general guideline:
  - PCI is recommended for SYNTAX score 0 to 22 (low)
  - CABG is recommend for SYNTAX score  $\geq 33$  (high)
  - PCI or CABG may be performed for SYNTAX score 23 to 32 (intermediate); if in doubt, CABG is recommended

#### c. Non-Coronary Factors

Diabetes, renal insufficiency, and low left ventricular ejection fraction are by themselves not sufficient criteria to determine selection of PCI vs. CABG. Some,<sup>10</sup> but not all<sup>11</sup> meta-analyses have found improved late survival in patients with diabetes managed with CABG rather than PCI. A recent randomized trial of stents vs. CABG in diabetic patients found comparable short-term mortality between the two modalities.<sup>12</sup> However, in the larger more recent randomized trial—the FREEDOM trial—CABG significantly reduced rates of death and myocardial infarction as compared with PCI, with a higher rate of stroke.<sup>13</sup> Of note, 86% of patients in this trial had triple vessel disease, with a mean of 5.7 lesions per patient. Thus, these trial results primarily apply to outcomes of patients with very advanced coronary artery disease. Nonetheless, patients with diabetes often have more diffuse disease than patients without diabetes which is better managed with CABG. Focal, discrete atherosclerotic disease in patients with diabetes may be treated by PCI. If there is equipoise between PCI and CABG in patients with diabetes, in general CABG should be preferred.

#### d. Chronic Total Occlusion

An artery with a chronic total occlusion (CTO) supplying viable myocardium with significant ischemia should be revascularized. A well-formed collateral supply is not adequate to protect the patient from ischemia. PCI is an acceptable first choice if the anticipated procedural success rate is reasonably high (>70%) and complication rate low (<1%), and a drug eluting stent (DES) can be placed; otherwise CABG should be performed.

## Definitions of Outcomes

### Death

All deaths will be adjudicated and classified as cardiovascular, non- cardiovascular or undetermined. Cardiovascular deaths are defined as all deaths excluding those for which the principal and underlying cause is solely non-cardiovascular. Any death for which a cardiovascular contributing cause is suspected will also be considered a cardiovascular death.

### Myocardial Infarction

Two versions of MI will be adjudicated in ISCHEMIA: a primary definition and secondary definition. Each definition includes a hierarchy of markers and threshold values as well as a set of rules for diagnosing MI when one or more key elements of the medical record are missing.

The Primary Definition is based upon the Universal Definition of MI, but relies upon site-reported MI decision limits for troponin (which may or may not be the same as the manufacturer 99%URL), and has selected unique marker criteria for MI after PCI or CABG (Type 4a, 5).

The Secondary Definition is also based upon the Universal Definition of Myocardial Infarction, but specifically uses the 99%URL from the assay manufacturer's package insert (which may or may not be the site's MI decision limit) and uses the same supporting criteria (eg. angiographic and ECG) as the UMI definition.

All MI events will be classified based on the Universal MI classification system as follows:

- Type 1: Spontaneous MI
- Type 2: Secondary MI
- Type 3: Sudden Death MI
- Type 4a: MI related to PCI
- Type 4b: MI related to stent thrombosis
- Type 4c: MI related to stent restenosis
- Type 5: MI related to CABG
- Silent MI

### ***Spontaneous MI (Types 1, 2, 4b, 4c)***

Diagnosis of spontaneous MI will be satisfied by a clinical setting consistent with acute myocardial ischemia and any one or more of the following criteria:

Marker elevation, as outlined below and at least 1 of the following:

- Symptoms of ischemia, usually lasting > 20 minutes in duration
- New ischemic ST and/or T wave and/or Q-wave ECG changes, or new LBBB, as described below
- Imaging evidence of new loss of viable myocardium in comparison to the baseline imaging test
- Angiographic evidence of intracoronary thrombus, stent thrombosis (4b) or high-grade in-stent restenosis (≥50%) (4c)

Marker data not available and at least 2 of the following:

- New ischemic ST and/or T wave and/or Q-wave ECG changes, or new LBBB, as described below
- Imaging evidence of new loss of viable myocardium in comparison to the baseline imaging test
- Angiographic evidence of intracoronary thrombus.

Autopsy evidence of a fresh myocardial infarction as stand-alone criterion

### ***Spontaneous MI Marker Criteria***

Troponin, including high-sensitivity troponin, is the preferred biomarker and takes precedence over CK-MB for both definitions.

Primary Definition: Preferentially uses a troponin threshold value reported as MI Decision Limit or the Upper Limit of Normal (ULN). Marker elevation is defined as troponin > ULN/MI decision limit. If troponin is not done or not available, then CK-MB > ULN will qualify. If both troponin and CK-MB are not done or not available, then CK > 2 x ULN will qualify.

Secondary Definition: Preferentially uses a troponin threshold reported by the manufacturer, namely, the manufacturer 99th percentile. Marker elevation is defined as troponin > 99th percentile. If the troponin 99th percentile is not reported, then troponin > ULN will qualify. If troponin is not done or not available, then CK-MB > ULN will qualify. If both troponin and CK-MB are not done or not available, then CK > 2 x ULN will qualify.

### ***Spontaneous MI ECG Criteria***

ECG criterion is considered to be met if any of the following:

ST elevation: New ST elevation at the J-point in two contiguous leads with the cutpoints:  $\geq 0.2$  mV in men >age 40 and  $\geq 0.25$  mV in men <40 years or  $\geq 0.15$  mV in women in leads V2–V3 and/or  $\geq 0.1$  mV in other leads, or new LBBB.

Any new Q-wave in leads V2–V3  $\geq 0.02$  seconds or QS complex in leads V2 and V3 or Q-wave  $\geq 0.03$  seconds and  $\geq 0.1$  mV deep or QS complex in leads I, II, aVL, aVF, or V4–V6 in any two leads of a contiguous lead grouping (I, aVL, V6; V4–V6; II, III, and aVF) or R-wave  $\geq 0.04$  seconds in V1–V2 and R/S  $\geq 1$  with a concordant positive T-wave in the absence of a conduction defect.

ST depression and/or T-wave changes, new horizontal or down-sloping ST depression  $\geq 0.05$  mV in two contiguous leads; and/or T-wave inversion  $\geq 0.1$  mV in two contiguous leads. The ST-T wave criteria only apply in the absence of findings that would preclude ECG analysis such as LBBB, LVH with repolarization abnormalities, pre-excitation and pacemakers.

### ***Silent MI***

This event includes evidence of new silent Q-wave MI detected during routine protocol or clinically obtained ECG follow-up. Silent MI events will be classified as a type 1 MI.

### ***Sudden death MI (Type 3)***

MI events in which a presentation consistent with infarction is present but the patient dies before the biomarkers are drawn or within the first few hours of the event before the biomarkers become positive. Sudden unexpected cardiac death, including cardiac arrest, often with symptoms suggestive of myocardial ischemia, accompanied by presumably new ST-segment elevation, or new LBBB, or evidence of fresh thrombus in a coronary artery by angiography and/or at autopsy, but death occurring before blood samples could be obtained, or at a time before the appearance of cardiac biomarkers in the blood.

### ***PCI-Related MI (Type 4a)***

#### **Primary Definition**

CK-MB is the preferred biomarker and takes precedence over troponin. For subjects with normal baseline biomarker level pre-PCI, peri-PCI MI requires a rise in CK-MB to >5-fold the ULN (or a rise in troponin to >35 times the MI Decision Limit/ULN, when CK-MB is unavailable) within 48 hours post-PCI. If pre-PCI cardiac markers (CKMB or cTn) are elevated, they must be stable or falling as indicated by two samples at least 6 h apart. The post-PCI CKMB level should reflect a rise of >20% over pre-PCI levels. In addition to biomarker criteria, peri-PCI MI requires at least one of the following:

- Post- procedure angiographic TIMI 0/1 flow in a major coronary artery or a side branch with reference vessel diameter  $\geq 2.0$  mm which had TIMI 2-3 flow at baseline, or TIMI 2 flow in a major coronary artery or a side branch with reference vessel diameter  $\geq 3.0$  mm which had TIMI 3 flow at baseline or Type C dissection (NHLBI classification) or greater in the target vessel.
- New ECG changes (ST segment elevation or depression  $>0.1$  mV in 2 contiguous leads), new pathologic Q-waves in  $\geq 2$  contiguous leads, or new persistent LBBB present on a post-PCI ECG obtained at least 30 minutes and up to 48 hours post procedure in the absence of any intervening coronary event between the time of the PCI procedure and the ECG showing changes.

NOTE: A type 4a MI will be diagnosed with a rise in CK-MB to >10-fold the ULN (or when CK-MB is unavailable, a rise in troponin to >70 times the MI Decision Limit/ULN) as a stand-alone criterion. If biomarkers are missing, a type 4a MI will be diagnosed if BOTH ECG criteria (new ST elevation or depression, Q-wave criteria, or new and persistent LBBB) AND angiographic criteria above are present. If pre-PCI cardiac markers are missing, they will be assumed to be normal in those without a preceding event.

#### **Secondary Definition**

Elevation of troponin values  $>5 \times$  99th percentile URL within 48 hours post-PCI in patients with normal baseline troponin values pre-PCI AND a rise of troponin values  $>20\%$  if the baseline values are elevated pre-PCI and are stable or falling. If the troponin 99th percentile is not available, the MI Decision Limit / ULN may be used. If troponins are not available, CKMB elevation  $>5 \times$  ULN will be used.

In addition to biomarker criteria, peri-PCI MI requires at least one of the following:

- Symptoms suggestive of myocardial ischemia ( $\geq 20$  min)

- New ischemic ST changes or new pathological Q waves. (see “ECG Criteria” above) Note the UMI definition uses  $\geq 0.05$  mV of STD whereas the ISCHEMIA definition uses  $\geq 0.1$  mV for PCI related ECG criteria
- Angiographic evidence of a flow limiting complication, such as loss of patency of a side branch, persistent slow-flow or no re-flow, embolization, or Type C dissection (NHLBI classification) or greater in the target vessel.
- Imaging evidence of new loss of viable myocardium or new regional wall motion abnormality.

NOTE: A type 4a MI will be diagnosed with a rise in troponin to  $>70$  times the 99th percentile URL (or, when troponin is unavailable, a rise in CK-MB to  $>10$  times the ULN) as a stand-alone criterion. If biomarkers are missing, a type 4a MI will be diagnosed if BOTH ECG criteria (new ST elevation or depression, Q-wave criteria, or new and persistent LBBB) AND angiographic criteria above are present. If pre- PCI cardiac markers are missing, they will be assumed to be normal in those without a preceding event.

### ***CABG-Related MI (Type 5)***

#### **Primary Definition**

CK-MB is the preferred serum biomarker and takes precedence over cardiac troponin. For subjects with normal baseline biomarker level pre-CABG, peri-CABG MI requires a rise in CK-MB to  $>10$ -fold the ULN (or a rise in troponin to  $>70$  times MI Decision Limit/ULN when CK-MB is unavailable) within 48 hrs post-CABG. In addition to biomarker criteria, peri-CABG MI requires at least one of the following:

- A new substantial wall motion abnormality by cardiac imaging (CEC assessed), except new septal and apical abnormalities. The CEC will have latitude in determining whether a new wall motion abnormality is “substantial” in the context of the clinical event.
- New pathologic Q-waves in  $\geq 2$  contiguous leads or new persistent LBBB is present on post CABG ECG obtained day 3 post CABG, or hospital discharge, whichever comes earlier in the absence of any intervening coronary event between the time of the CABG procedure and the ECG showing changes.

NOTE: A type 5 MI will be diagnosed with a rise in CK-MB to  $>15$ -fold the ULN (or when CK-MB is unavailable a rise in troponin to  $>100$  times the MI Decision Limit/ULN) as a stand-alone criterion. If biomarkers are missing, an MI will be diagnosed if the ECG criteria (New pathologic Q waves or new persistent LBBB) AND new substantial wall motion abnormality are BOTH present. If pre-CABG cardiac markers are missing, they will be assumed to be normal in those without a preceding event.

#### **Secondary Definition**

Elevation of troponin values  $>10$  X 99th percentile URL within 48 hrs post-CABG in patients with normal baseline troponin values ( $\leq$  99th percentile URL). If the troponin 99th percentile is not available, the ULN may be used. If troponins are not available, CKMB elevation  $>10$  X ULN will be used. In addition to biomarker criteria, peri-CABG MI requires at least one of the following:

- New pathologic Q waves or new LBBB
- Angiographic evidence of new graft or new native coronary artery occlusion.
- Imaging evidence of new loss of viable myocardium.

NOTE: A type 5 MI will be diagnosed with a rise in troponin to >100 times the 99th percentile URL (or when troponin is unavailable a rise in CK-MB to >15 times the ULN) as a stand-alone criterion. If biomarkers are missing, an MI will be diagnosed if the ECG criteria (New pathologic Q waves or new persistent LBBB) AND new substantial wall motion abnormality are BOTH present. If pre-CABG cardiac markers are missing, they will be assumed to be normal in those without a preceding event.

### ***Complicated MI and Large MI***

*Complicated MI:* Prognostically important MIs may also be identified as those with complications such as hemodynamic instability, cardiogenic shock, drop in EF >10% from baseline, electrical instability with life-threatening VT or VF, or heart failure complicating MI. Complicated myocardial infarctions may typically require ICU care, invasive support (eg. intubation, IABP, PA catheters) and intravenous medications (eg. inotropes or antiarrhythmics.) CEC adjudicators will identify complicated MIs based upon the information available to them in the eCRF and source documents.

- Hemodynamic instability: requiring fluids, inotropic or vasopressor support to maintain end-organ perfusion. May progress to shock if also accompanied by end-organ underperfusion.
- Shock: Compromise of end-organ perfusion due to hemodynamic instability and sustained hypotension. Often manifested by hypotension, increased creatinine, shock liver, and decreased mentation.
- Life-threatening VT or VF: Requiring antiarrhythmics or defibrillation to return sinus rhythm. Transient runs of VT (eg. during reperfusion) are not associated with hemodynamic instability are not usually considered life-threatening.
- Decreased EF  $\geq$  10%: EF assessment during the event which indicates a drop from prior assessments (eg. EF 30% from previous EF 55%)
- HF in the setting of an MI is defined on the basis of the physician's decision to treat HF with an intravenous (IV) diuretic, IV inotropic agent or IV vasodilator and at least 1 of the following:
  - Presence of pulmonary edema or pulmonary vascular congestion on chest radiograph believed to be of cardiac cause.
  - Rales greater than 1/3 up the lung fields believed to be due to HF.
  - Pulmonary Capillary Wedge Pressure (PCWP) or left ventricular end diastolic pressure (LVEDP) greater than 18 mmHg.
  - Dyspnea, with documented paO<sub>2</sub> less than 80 mmHg on room air or O<sub>2</sub> saturation less than 90% on room air, without significant lung disease

*Large MI:* The size of MI will be assessed by examining peak levels of cardiac biomarkers as a continuous function.



### Hospitalization for Unstable Angina

Prolonged ischemic symptoms at rest (usually  $\geq 10$  minutes in duration), or accelerating pattern of chest pain that occurs with a lower activity threshold (CCS class III or IV) considered to be myocardial ischemia upon final diagnosis resulting in an unscheduled visit to a healthcare facility resulting in an overnight stay generally within 24 hours of the most recent symptoms, cardiac biomarkers not meeting MI criteria, and at least one of the following:

- New or worsening ST or T wave changes on resting ECG\* (core laboratory assessed)
- Angiographic evidence of a ruptured/ulcerated plaque, or thrombus in an epicardial coronary artery believed to be responsible for the ischemic symptoms/signs (core laboratory assessed).

\*ECG Criteria:

ST segment shifts and T-wave changes: New horizontal or down-sloping ST depression  $\geq 0.05$  mV in two contiguous leads; and/or T inversion  $\geq 0.1$  mV in two contiguous leads, or new ST segment elevation  $\geq 0.1$  mV in 2 contiguous leads. The ST-T wave criteria only apply in the absence of findings that would preclude ECG analysis such as LBBB, LVH with repolarization abnormalities, pre-excitation and pacemakers.

### Resuscitated Cardiac Arrest

Resuscitated cardiac arrest is defined as successful resuscitation for documented cardiac arrest out-of-hospital (or ER) in a patient subsequently admitted to hospital, and then discharged. A patient who is successfully resuscitated but dies before hospital discharge of complications related to the cardiac arrest (e.g., anoxic encephalopathy, septic shock), will be classified as a coronary heart disease death. An uncomplicated procedure-related cardiac arrest with prompt resuscitation and without adverse sequelae will not be counted as an event. Events that meet the MI criteria will be categorized as MI.

### Hospitalization for Heart Failure

While patients may have multiple simultaneous disease processes, for the outcome event of heart failure requiring hospitalization, the diagnosis of congestive heart failure would need to be the primary process. Heart failure (HF) requiring hospitalization is defined as an event that meets the following criteria:

- a. Requires hospitalization defined as an admission to an inpatient unit or a visit to an emergency department that result in at least a 24 hour stay (or a date change if the time of admission/discharge is not available).

### AND

- b. Clinical symptoms of heart failure, including at least one of the following: New or worsening
  - Dyspnea
  - Orthopnea
  - Paroxysmal nocturnal dyspnea
  - increasing fatigue/worsening exercise tolerance

AND

- c. Physical signs of heart failure, including at least two of the following:
1. Edema (> 2+ lower extremity)
  2. Pulmonary rales (pulmonary edema not occurring as the consequence of an arrhythmia in the absence of worsening heart failure. If pulmonary edema complicates acute MI event should be coded as MI)
  3. Jugular venous distension
  4. Tachypnea (respiratory rate > 20 breaths/minute)
  5. Rapid weight gain
  6. S3 gallop
  7. Increasing abdominal distension or ascites
  8. Hepatojugular reflux
  9. Radiological evidence of worsening heart failure
  10. A right heart catheterization within 24 hours of admission showing a pulmonary capillary wedge pressure (pulmonary artery occlusion pressure)  $\geq 18$  mm Hg and/or a cardiac output  $< 2.2$  L/min/m<sup>2</sup>

NOTE: Biomarker results (e.g., brain natriuretic peptide (BNP) > 500 or Pro-NT BNP > 2500) consistent with congestive heart failure will be supportive of this diagnosis, but the elevation in BNP cannot be due to other conditions such as cor pulmonale, pulmonary embolus, primary pulmonary hypertension, or congenital heart disease. Increasing levels of BNP, although not exceeding the ULN, may also be supportive of the diagnosis of congestive heart failure in selected cases (e.g. morbid obesity).

AND

- d. Need for additional/increased therapy  
Initiation of, or an increase in, treatment directed at heart failure or occurring in a patient already receiving maximal therapy for heart failure and including at least one of the following:
1. Initiation of or a significant augmentation in oral therapy for the treatment of congestive heart failure
  2. Initiation of intravenous diuretic, inotrope, or vasodilator therapy
  3. Uptitration of intravenous therapy, if already on therapy
  4. Initiation of mechanical or surgical intervention (mechanical circulatory support, heart transplantation or ventricular pacing to improve cardiac function), or the use of ultrafiltration, hemofiltration, or dialysis that is specifically directed at treatment of heart failure.

AND

- e. No other non-cardiac etiology (such as chronic obstructive pulmonary disease, hepatic cirrhosis, acute renal failure, or venous insufficiency) and no other cardiac etiology (such as pulmonary embolus, cor pulmonale, primary pulmonary hypertension, or congenital heart disease) for signs or symptoms are identified.

## Stroke

Stroke is defined as the rapid onset of a new neurologic deficit attributed to an obstruction in cerebral blood flow and/or cerebral hemorrhage with no apparent non-vascular cause (eg. trauma, tumor, or infection). Available neuroimaging studies will be considered to support the clinical impression and to determine if there is a demonstrable lesion compatible with an acute stroke.

### **Classification:**

#### Transient Ischemic Attack

A Transient Ischemic Attack is defined as an acute episode of focal cerebral, spinal, or retinal dysfunction caused by an ischemia of central nervous system tissue which resolves within 24 hrs and without neuroimaging evidence of acute infarction.

#### Ischemic Stroke

Ischemic stroke is defined as an acute episode of focal cerebral, spinal, or retinal dysfunction caused by an infarction of central nervous system tissue.

Signs/ symptoms  $\geq$  24 hrs regardless of neuroimaging findings:

Ischemic stroke can be defined clinically- by persistence of signs and symptoms  $\geq$  24 hrs, usually supported by evidence of infarction on neuroimaging (CT or MRI) although very early neuroimaging (usually with CT) may not demonstrate the infarction.

Signs/ symptoms < 24 hrs with neuroimaging evidence of infarction:

Ischemic stroke can be defined by neuroimaging- where neuroimaging (usually MRI diffusion weighted or flair images) confirms the presence of acute infarction even if signs/ symptoms resolve within 24 hrs.

Patients admitted for an acute stroke treated with thrombolysis or interventions that have no residual neurologic symptoms after treatment will be classified as an ischemic stroke.

#### Ischemic Stroke with Symptomatic Hemorrhagic Conversion

Hemorrhagic conversion may be a consequence of ischemic stroke and may be symptomatic, resulting in neurologic deterioration, or asymptomatic. Symptomatic Hemorrhagic Conversion is defined neuroimaging evidence of hemorrhage within the area of infarction associated with clinical deterioration (eg. increase in NIHSS of  $\geq$  4 points) or death, symptoms to hemorrhage related mass effect, or symptoms out of proportion to what would be expected from the ischemic stroke or cerebral edema alone. When an Ischemic Stroke with Symptomatic Hemorrhagic Conversion is identified, the date and time of stroke onset will refer to the first onset of the Ischemic Stroke and will not be counted as two events.

#### Hemorrhagic Stroke

Hemorrhagic stroke is defined as an acute episode of focal or global cerebral or spinal dysfunction caused by a non-traumatic intraparenchymal, intraventricular, or subarachnoid hemorrhage.

#### Undetermined- or Uncertain type- of Stroke

Undetermined stroke is defined as a stroke with insufficient information to allow categorization as Ischemic Stroke or Hemorrhagic Stroke. If possible, speculate on the stroke subtype and note in Comments. This is not to signify an indeterminate event where there is insufficient evidence to suspect a stroke had occurred.

## SUPPLEMENTARY STATISTICAL METHODS

### **Pre-Specified Primary Cox Model**

Outcome differences by treatment group were assessed in accordance with the statistical analysis plan using the Cox proportional-hazards model. To improve power and interpretability, the Cox model for each outcome was adjusted for a set of pre-specified baseline covariates (age, sex, estimated glomerular filtration rate [eGFR], ejection fraction, and diabetes). Continuous variables (age, eGFR, and ejection fraction) were modeled as restricted cubic splines with 2 degrees of freedom. For some patients ejection fraction was available in a categorical (35-45, 45-55, 55+) but not continuous form. We used a multiple imputation procedure to convert these patients' categorical ejection fraction values into continuous. Missing covariate data were rare and were handled within the same multiple imputation procedure with categorical ejection fraction.

### Competing Risks

The application of the Cox model accounted for the competing risk of death in the analysis of non-fatal outcomes and the competing risk of non-cardiovascular death in the analysis of outcomes that include cardiovascular but not non-cardiovascular death. We modeled the cause-specific hazard of the outcome of interest semi-parametrically under the proportional hazards assumption and left the form of the cause-specific hazard function of the competing event type unspecified. This was equivalent to treating patients with competing risk events as censored.

### Assessment of Proportional Hazards

The underlying assumption of proportional hazards for the Cox model was assessed graphically and by including time by treatment interaction terms. The statistical analysis plan specified that results presentation would emphasize alternative nonparametric analyses if the proportional hazards assumption was violated. Indeed, the proportional hazards assumption was not met for the primary outcome ( $p < 0.0001$  for test of time x treatment interaction) and for several secondary outcomes. Under non-proportional hazards, the p-value generated by the Cox model for testing the hypothesis of no difference in covariate-specific hazard rates by treatment group maintains its type-I error rate validity but is less powerful compared to the case where the proportional hazards assumption is satisfied.

### **Nonparametric Cumulative Incidence Function Estimator**

Cumulative event probability curves were estimated by the Kaplan-Meier method for outcomes not subject to competing risks and by a nonparametric cumulative incidence function estimator for outcomes that were subject to competing risks. Non-fatal outcomes such as myocardial infarction and heart failure are subject to the competing risk of death because the occurrence of such an event may be prevented by death. Cardiovascular death is also subject to competing risks because a cardiovascular death may be prevented by non-cardiovascular death. In general,

outcomes not subject to competing risks were all-cause death and composite outcomes that include all-cause death as a component outcome. Outcomes subject to competing risks are all the others. The cumulative incidence function estimator for competing risk data reduces to the Kaplan-Meier as a special case when it is applied to outcomes that are not subject to competing risks.

### **Considerations for Crossing Event Rate Curves**

For outcomes that are measured by time until the outcome occurs, there is no single number that can fully and uniquely capture the difference between treatment groups. This is because the magnitude of difference varies depending on the choice of time point for assessing a difference and the measurement scale (e.g. relative versus absolute differences). From a very general perspective, the "effect" of being randomized to invasive versus conservative treatment on a time-to-event outcome is the set of curves describing the event's probability of occurrence by time  $t$  over time in each treatment group. If these curves cross, then judgments about which treatment is "better" may depend heavily on the choice of summary metric. Such a determination is further complicated by the progressively greater statistical uncertainty accompanying estimates at later time points due to fewer patients being followed. In light of these challenges, the investigators' analysis and reporting philosophy was to report the data in a manner that provides readers with the full spectrum of relevant estimates and uncertainty measures. In particular, we sought to avoid a presentation style that causes study interpretation to be dominated by the investigators' own subjective preferences about the choice of a single summary metric. The ability to provide text descriptions of multiple summary metrics was partly constrained by the Journal's length requirements.

#### Difference in Event Rate at a Specified Time Point

In accordance with the SAP, cumulative outcome event rates and differences in these event rates were tabulated at annual time points and presented with 95% confidence intervals. . Differences at 6 months were also tabulated to reflect early differences arising from procedural complications as assigned revascularization procedures were completed by then.

#### Restricted Mean Event-Free Time

This metric is derived from the cumulative event rate curves and is interpreted as the per-person average number of days spent "event-free" during the time point between randomization and a designated time point which we selected as 5 years. A caveat about restricted mean event-free time is that it is heavily influenced by the proportion of patients who are event-free for the full 5 years. If this proportion is close to 1 (e.g. rare outcome events) then the average event-free time will necessarily be close to 5 and the difference between groups will necessarily be small. This feature is not necessarily undesirable as it correctly reflects the fact that rare events tend to have a limited impact on the average days spent event-free over the follow-up period.

## BAYESIAN COMPETING RISKS NON-PROPORTIONAL HAZARDS SURVIVAL ANALYSIS

### Overview

The goal of this analysis is to provide a framework for making probability statements about the direction and magnitude of the unknown treatment effect. We use the phrase "event probability curve" to describe the unknown probabilities that generated the study data. Our goal was to quantify the probability that curves for the invasive and conservative groups differ by an amount that is clinically meaningful. Separate parallel analyses were performed for three outcomes: (1) the primary outcome, (2) the major secondary outcome of CV death or MI, and (3) all-cause death.

### Bayesian Background

Bayesian analysis uses the language of probability to express beliefs about unknown quantities and clinical hypotheses in light of prior beliefs and the current study data. [1,2] The output of a Bayesian analysis is a posterior probability distribution describing the relative likelihood of different numerical estimates of unknown quantities. The posterior distribution of a parameter of interest can be summarized graphically in the form of a histogram or tabulated by presenting the probability that the true parameter is above or below some chosen numerical value. The Bayesian analog of a confidence interval (known as a credible) has a direct and intuitively appealing interpretation as an interval containing the true value with a specified probability e.g. 95%.

### Statistical Model

We originally planned to perform Bayesian analysis using the Cox proportional hazards model. Because the proportional hazards assumption underlying the Cox model was violated, we instead present a post-hoc Bayesian analysis using a flexible piecewise-exponential hazards (non-proportional hazards) model. The piecewise exponential approach was selected because it lends itself to simple and efficient Bayesian Markov Chain Monte Carlo (MCMC) computation and because it is flexible enough to accommodate a variety of shapes for the unknown cause-specific hazard function.[3] To implement the piecewise exponential modeling approach, follow-up time was divided into 14 intervals (0 to 14 days, 14 to 30 days, 30 to 60 days, 60 to 90 days, 90 to 180 days, 180 to 365 days, 1 to 1.5 years, 1.5 to 2 years, 2 to 2.5 years, 2.5 to 3 years, 3 to 3.5 years, 3.5 to 4 years, 4 to 5 years, 5 to 6 years, and beyond 6 years). The cause-specific hazard function for the event of interest was then approximated as a constant function within each treatment group and time interval. Additional details are in the Technical Details section which is immediately after the results.

### Prior Distribution

Bayesian analysis requires the specification of a probability distribution representing prior information about the set of unknown model parameters before observing the study data. Because prior information about model parameters was limited, our goal was to choose a

noninformative prior that would allow inferences to be driven by the current study data. The prior assumed that hazard rate parameters describing risk with each time interval in the CON group followed independent gamma distributions and that log-hazard ratios comparing INV to CON within each time interval followed independent diffuse normal distributions. To explore sensitivity to the choice of prior distribution we performed sensitivity analyses by using alternative specifications for the parameters of the gamma distributions and by assuming that log-hazard ratios follow an autoregressive AR(1) prior making them a priori dependent instead of independent. The choice of parameters of the gamma distributions had a negligible impact and these results are not shown. The choice between an independent versus AR(1) prior for log hazard ratios had a small but noticeable impact on calculated probabilities and we report results for both choices of prior.

## Results

Figures: In the Figures S10a through S10i, we summarize evidence about the direction and magnitude of the difference in event rates at 1, 3, and 5 years in the form of a Bayesian posterior probability distribution. Event rates are expressed as proportions ranging from 0 to 1. The probability that the true difference in proportions is within a narrow interval is proportional to the height of the bar covering that interval.

Tables: Tables S12a through S12f summarize evidence about cumulative event rates and differences in these event rates at annual time points. Event rates are expressed as percentages ranging from 0% to 100%. The Bayesian point estimate (posterior mean) of the difference in event rates is presented along with a 95% Bayesian credible interval (CrI). For each time point, we report Bayesian probabilities that express the likelihood that the difference at that time point favors INV or CON by any amount, by at least 1 percentage point, or by at least 3 percentage points.

## Technical Details for Bayesian Analysis

### Model

In order to account for competing risk of non-cardiovascular mortality in the analysis of the primary outcome and the CV death or MI outcome, we assumed that outcome events and competing non-cardiovascular deaths could be described by a continuous time multi-state model with states corresponding to: (1) alive and event free, (2) died event free from non-cardiovascular mortality, and (3) event has occurred. All patients were assumed to begin in State 1. The joint distribution of sojourn time in State 1 and the state entered upon leaving State 1 was assumed to be determined by a set of hazard functions (aka transition intensity functions) which were assumed to differ by treatment group. Hazard functions describing transitions into State 3 (event) were approximated as piecewise constant functions with jumps at months 0.5, 1, 2, 3, 6, 12, 18, 24, 30, 36, 42, 48 and 60. Hazard functions describing transitions into State 2 (competing non-cardiovascular death) were approximated as step functions with jumps at months 12, 24, 36 and 48. Parameters to be estimated were:

- 14 hazard rate parameters describing transitions into State 3 (event) in CON



- $\lambda_{con,1}^{event}, \lambda_{con,2}^{event}, \dots, \lambda_{con,14}^{event}$
- 14 hazard rate parameters describing transitions into State 3 (event) in INV
  - $\lambda_{inv,1}^{event}, \lambda_{inv,2}^{event}, \dots, \lambda_{inv,14}^{event}$
- 5 hazard rate parameters describing transitions into State 2 (competing non-CV death) in CON
  - $\lambda_{con,1}^{ncvdeath}, \lambda_{con,2}^{ncvdeath}, \dots, \lambda_{con,5}^{ncvdeath}$
- 5 hazard rate parameters describing transitions into State 2 (competing non-CV death) in INV
  - $\lambda_{inv,1}^{ncvdeath}, \lambda_{inv,2}^{ncvdeath}, \dots, \lambda_{inv,5}^{ncvdeath}$

In order to estimate these parameters we assumed that the number of patients experiencing the outcome event of interest and the number of patients experiencing the competing non-CV death event within each treatment group and time interval were independent Poisson random variables. Specifically, we assumed that:

$$\begin{aligned}
 Y_{inv,j} &\sim \text{ind. Poisson}(N_{inv,j} \lambda_{inv,j}^{event}) \\
 Y_{con,j} &\sim \text{ind. Poisson}(N_{con,j} \lambda_{con,j}^{event}) \\
 D_{inv,j} &\sim \text{ind. Poisson}(N_{inv,j} \lambda_{inv,j}^{ncvdeath}) \\
 D_{con,j} &\sim \text{ind. Poisson}(N_{con,j} \lambda_{con,j}^{ncvdeath})
 \end{aligned}$$

where  $N_{inv,j}$  and  $N_{con,j}$  are the person-days of follow-up in time interval  $j$  in the invasive and conservative groups, respectively,  $Y_{inv,j}$  and  $Y_{con,j}$  are the number of patients experiencing the outcome event of interest in the  $j$ -th interval in the invasive and conservative groups, respectively, and  $D_{inv,j}$  and  $D_{con,j}$  are the number of patients with a competing CV death in the  $j$ -th interval in the invasive and conservative groups, respectively. The assumption that outcome events and deaths follow independent Poisson distributions is a consequence of the multi-state modeling assumptions described above combined with the assumptions that hazard rate functions are piecewise constant and that censoring times are independent of death or outcome events.

### Prior Specification

To simplify notation we use subscript 1 in place of INV and 2 in place of CON. Thus, the analysis requires specification of a prior distribution for the collection of parameters:

$$\begin{aligned}
 &\lambda_{1,1}^{event}, \lambda_{1,2}^{event}, \dots, \lambda_{1,14}^{event} \quad (\text{hazard rates for events in INV}) \\
 &\lambda_{2,1}^{event}, \lambda_{2,2}^{event}, \dots, \lambda_{2,14}^{event} \quad (\text{hazard rates for events in CON}) \\
 &\lambda_{1,1}^{ncvdeath}, \lambda_{1,2}^{ncvdeath}, \dots, \lambda_{1,5}^{ncvdeath} \quad (\text{hazard rates for non-CV deaths in INV}) \\
 &\lambda_{2,1}^{ncvdeath}, \lambda_{2,2}^{ncvdeath}, \dots, \lambda_{2,5}^{ncvdeath} \quad (\text{hazard rates for non-CV deaths in INV})
 \end{aligned}$$

Define  $\beta_j^{event} = \log(\lambda_{1,j}^{event} / \lambda_{2,j}^{event})$  and  $\beta_j^{ncvdeath} = \log(\lambda_{1,j}^{ncvdeath} / \lambda_{2,j}^{ncvdeath})$  to be the log-hazard ratio for INV versus CON in the  $j$ -th time interval for events and competing non-CV deaths, respectively. We implemented the analysis using 2 choices for the prior distribution as follows.

### *Prior #1 (primary)*

We specified independent gamma priors for the hazard rates in the INV group and vague independent normal priors for the set of log-hazard ratios. The prior distribution was:

$$\begin{aligned} \lambda_{2,j}^{\text{event}} &\sim \text{ind. Gamma}(0.001,1.0), \quad j = 1, \dots, 14 \\ \beta_j^{\text{event}} &\sim \text{ind. Normal}(\text{mean} = 0, \text{variance} = 10^5), \quad j = 1, \dots, 14. \\ \lambda_{2,j}^{\text{ncvdeath}} &\sim \text{ind. Gamma}(0.001,1.0), \quad j = 1, \dots, 5 \\ \beta_j^{\text{ncvdeath}} &\sim \text{ind. Normal}(\text{mean} = 0, \text{variance} = 10^5), \quad j = 1, \dots, 5. \end{aligned}$$

*Prior #2 (sensitivity analysis using autoregressive AR(1) prior on log-hazard ratios)*

$$\begin{aligned} \lambda_{2,j}^{\text{event}} &\sim \text{ind. Gamma}(0.001,1.0), \quad j = 1, \dots, 14 \\ \beta_1^{\text{event}} &\sim \text{ind. Normal}(\text{mean} = 0, \text{variance} = 10^5) \\ \beta_j^{\text{event}} &\sim \text{ind. Normal}(\text{mean} = 0.9999984\beta_{j-1}, \text{variance} = 0.31419), \quad j = 2, \dots, 14 \\ \lambda_{2,j}^{\text{ncvdeath}} &\sim \text{ind. Gamma}(0.001,1.0), \quad j = 1, \dots, 5 \\ \beta_1^{\text{ncvdeath}} &\sim \text{ind. Normal}(\text{mean} = 0, \text{variance} = 10^5) \\ \beta_j^{\text{ncvdeath}} &\sim \text{ind. Normal}(\text{mean} = 0.9999984\beta_{j-1}, \text{variance} = 0.31419), \quad j = 2, \dots, 5 \end{aligned}$$

Parameters of the autoregressive prior were chosen to ensure that the ratio of hazard ratios in two consecutive time intervals would fall between 1/3 and 3 with 95% prior probability.

### Computation

Posterior means and other summaries of the posterior distribution were calculated using Markov Chain Monte Carlo (MCMC) simulations as implemented in WinBUGS software and validated with the SAS PROC MCMC procedure. To reduce Monte Carlo error and ensure convergence, we generated 2,000,000 sets of simulated parameter values and retained every 20th sample for a final set of 100,000 randomly sampled sets of parameter values.

### **References**

1. Jaynes ET. Confidence intervals vs Bayesian intervals. In Foundations of probability theory, statistical inference, and statistical theories of science, Vol II, 1976 (pp. 175-257). D. Reidel Publishing Company. Dordrecht Holland.
2. Gelman A, Carlin JB, Stern HS, Dunson DB, Vehtari A, Rubin DB. Bayesian data analysis. Chapman and Hall/CRC; 2013 Nov 27.
3. Ibrahim JG, Chen MH, Sinha D. Bayesian survival analysis. Springer, New York, 2001.

## IV. Supplementary Figures

Figure S1. Study Flow

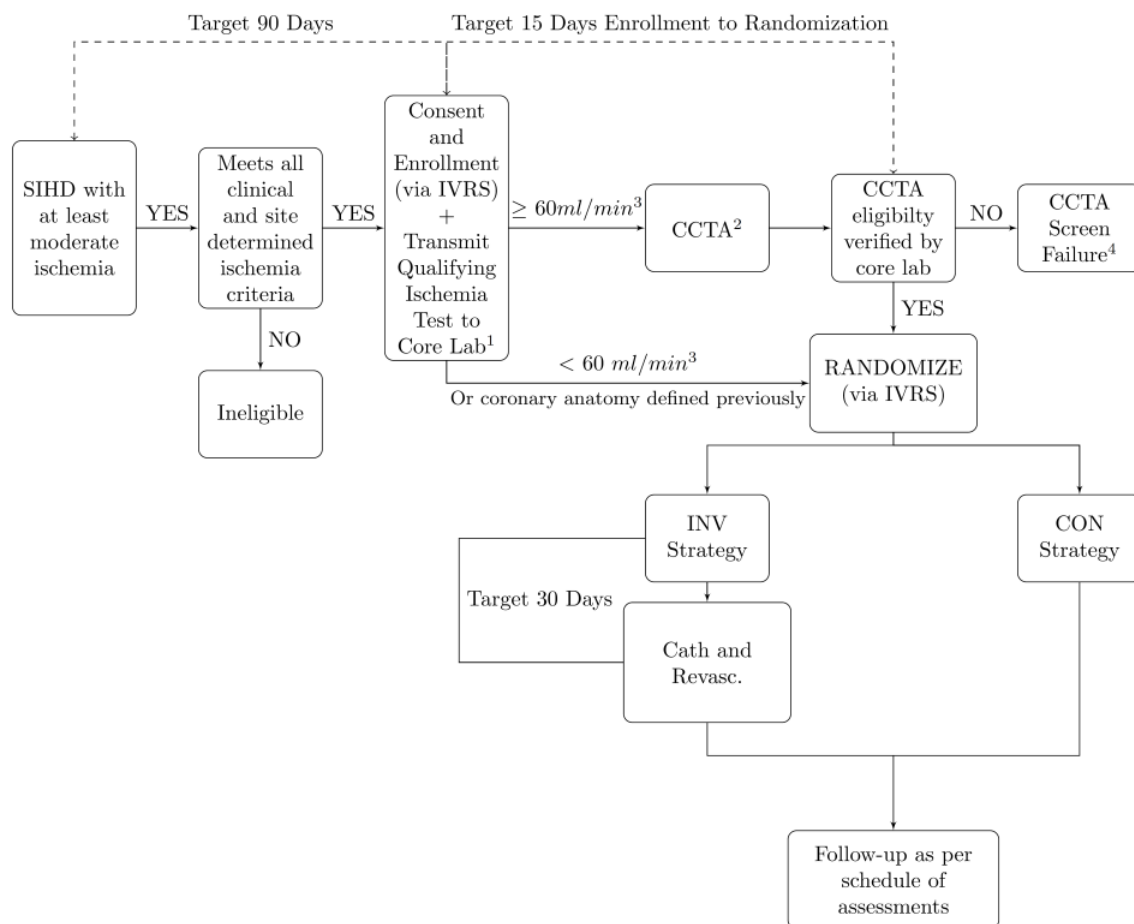

<sup>1</sup> See MOO for measures to ensure randomization of participants who meet ischemia eligibility.

<sup>2</sup> CCTA will not be performed in participants with eGFR < 60 ml/min or in participants who have had invasive angiography or CCTA within the prior 12 months (the number of patients enrolled with recent invasive angiography or CCTA may be capped)

<sup>3</sup> Participants with eGFR < 60 ml/min with no clinical or ischemia testing characteristics suggestive of significant left main coronary artery stenosis are eligible to be randomized. Participants with eGFR < 30 or on dialysis are included in the CKD ancillary trial. Some participants with eGFR ≥ 60 may not undergo CCTA (see 6.5 and MOO). Some participants with eGFR < 60 may undergo CCTA based on physician preference. Allowance of participants with exceptions to performance of CCTA relative to eGFR.

<sup>4</sup> CCTA screen failure due to no obstructive CAD will be enrolled in an ancillary study at participating sites. (CIAO-ISCHEMIA)

SIHD: Stable ischemic heart disease

CCTA: Coronary computed tomography angiography

IVRS: Interactive Voice Response Systems

INV: Invasive

CON: Conservative

MOO: Manual of Operations

eGFR: Estimated glomerular filtration rate

CKD: Chronic Kidney Disease

CIAO-ISCHEMIA: Ancillary study. Changes in Ischemia and Angina over One year among ISCHEMIA trial screen failures with no obstructive coronary artery disease on CT angiography.

CAD: Coronary artery disease

Figure S2. Cross-Sectional Screening Data

All enrolling sites reported screening data for time-limited periods of variable duration

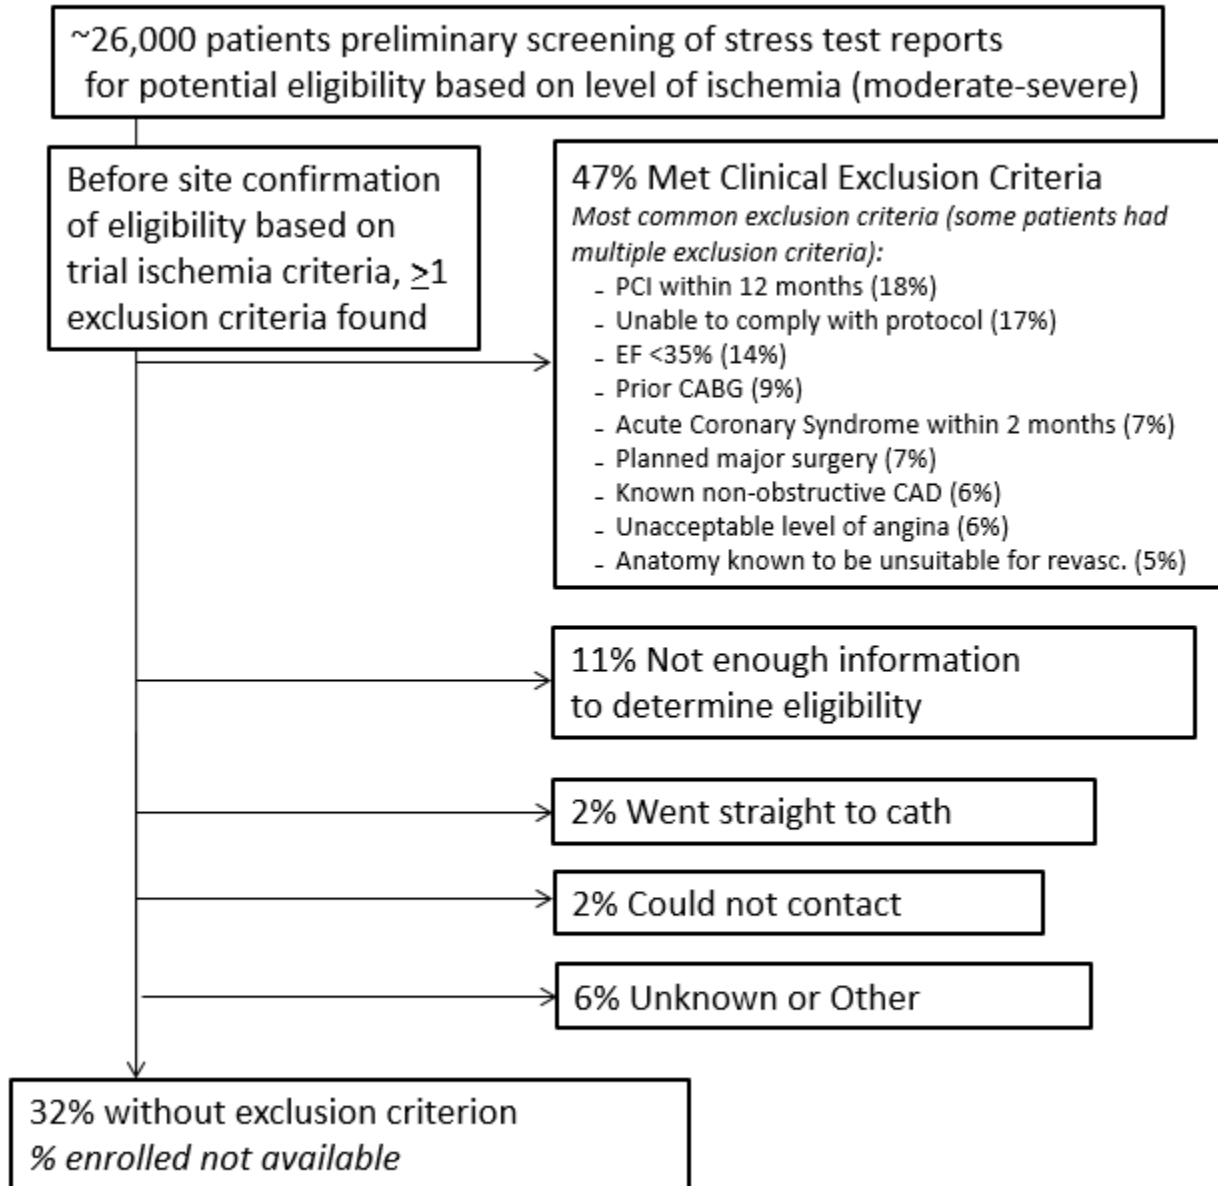

Figure S3a. Fractional Flow Reserve Algorithm After Stress Imaging

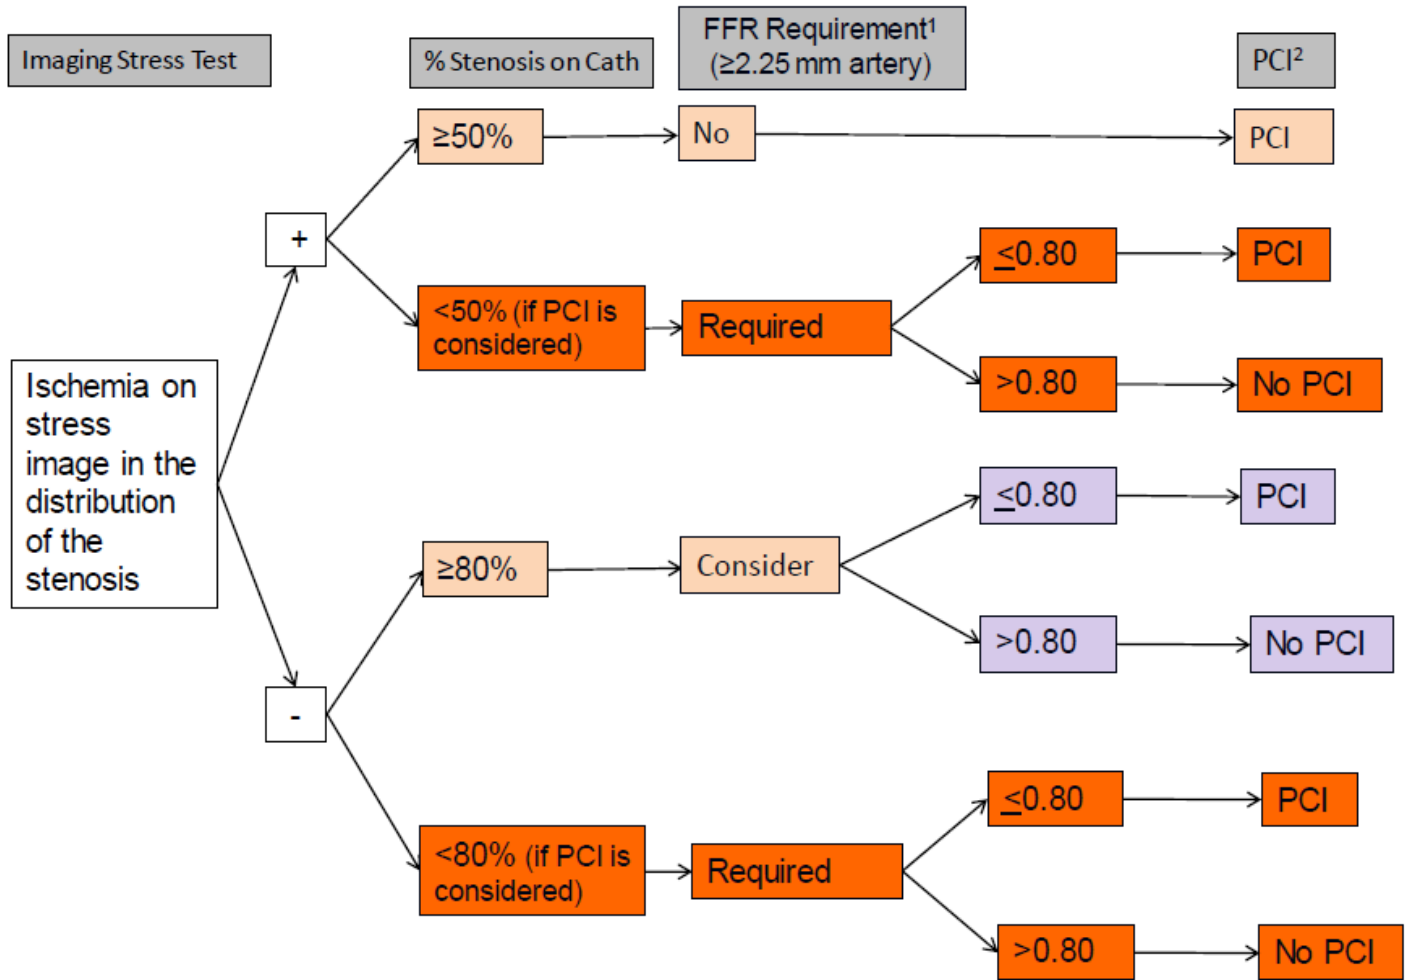

<sup>1</sup>The use of instantaneous wave-free ratio (iFR) instead of FFR (where available) was permitted, using a cutoff of  $\leq 0.89$  for physiologic significance.  
<sup>2</sup>PCI based on anatomic feasibility and clinical considerations

Reprinted from *American Heart Journal*, 2018;201:124-135, ISCHEMIA Trial Research Group, Maron DJ, Hochman JS, O'Brien SM, Reynolds HR, Boden WE, Stone GW, Bangaore S, Spertus JA, Mark DB, Alexander KP, Shaw L, Berger JS, Ferguson TB Jr, William DO, Harrington RA, Rosenberg Y, International Study of Comparative Health Effectiveness with Medical and Invasive Approaches (ISCHEMIA) trial: Rationale and Design, 2018, with permission from Elsevier

Figure S3b. Fractional Flow Reserve Algorithm After Non-Imaging Exercise Stress Test  
For ETT Participants

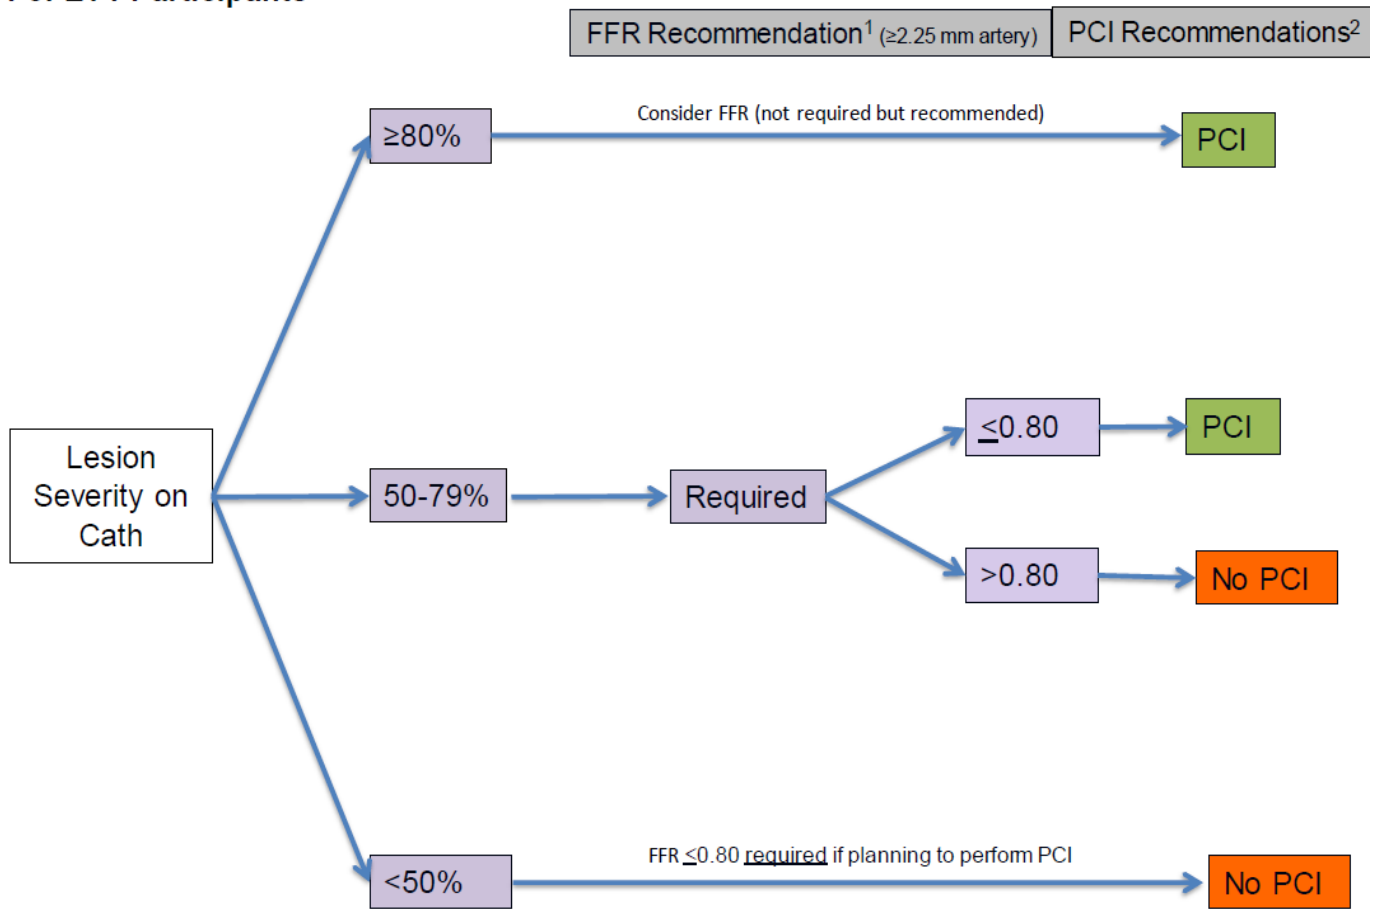

<sup>1</sup>The use of instantaneous wave-free ratio (iFR) instead of FFR (where available) was permitted, using a cutoff of  $\leq 0.89$  for physiologic significance.

<sup>2</sup>PCI based on anatomic feasibility and clinical considerations

Reprinted from *American Heart Journal*, 2018;201:124-135, ISCHEMIA Trial Research Group, Maron DJ, Hochman JS, O'Brien SM, Reynolds HR, Boden WE, Stone GW, Bangaore S, Spertus JA, Mark DB, Alexander KP, Shaw L, Berger JS, Ferguson TB Jr, William DO, Harrington RA, Rosenberg Y, International Study of Comparative Health Effectiveness with Medical and Invasive Approaches (ISCHEMIA) trial: Rationale and Design, 2018, with permission from Elsevier

Figure S4. Medication Use During the Trial

**Beta Blockers**

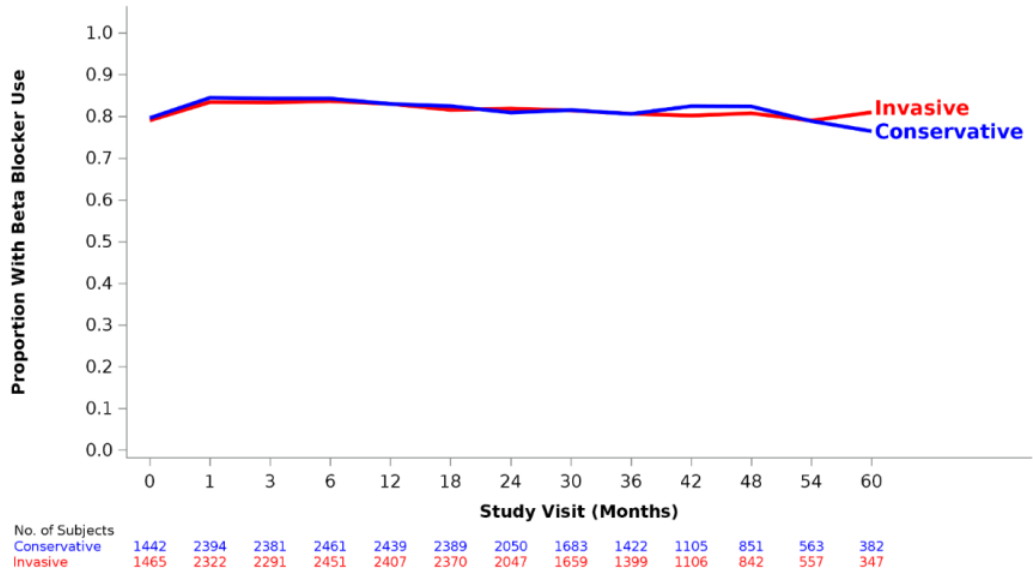

**Calcium Channel Blockers**

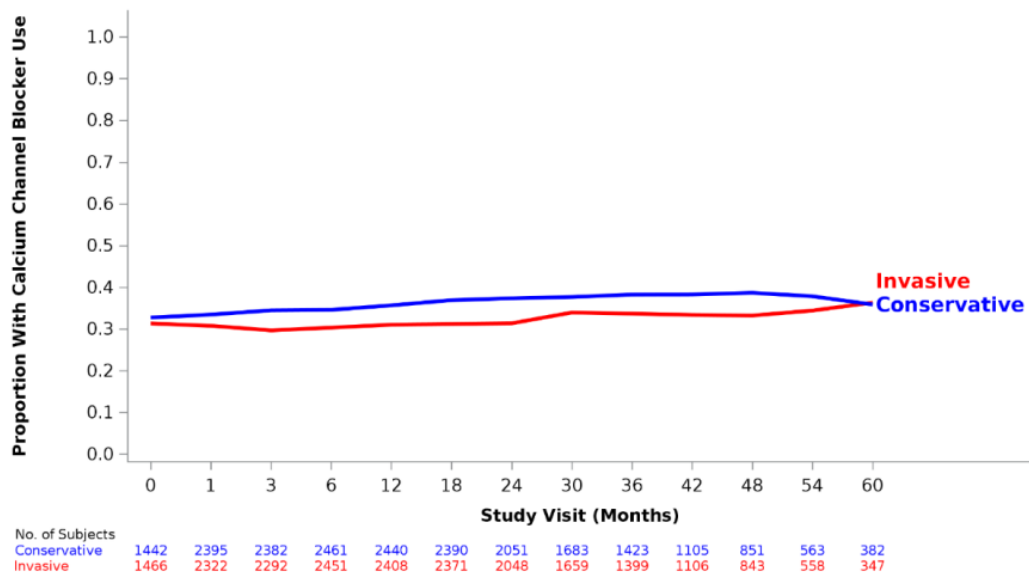

## Other Anti-Anginal Medication

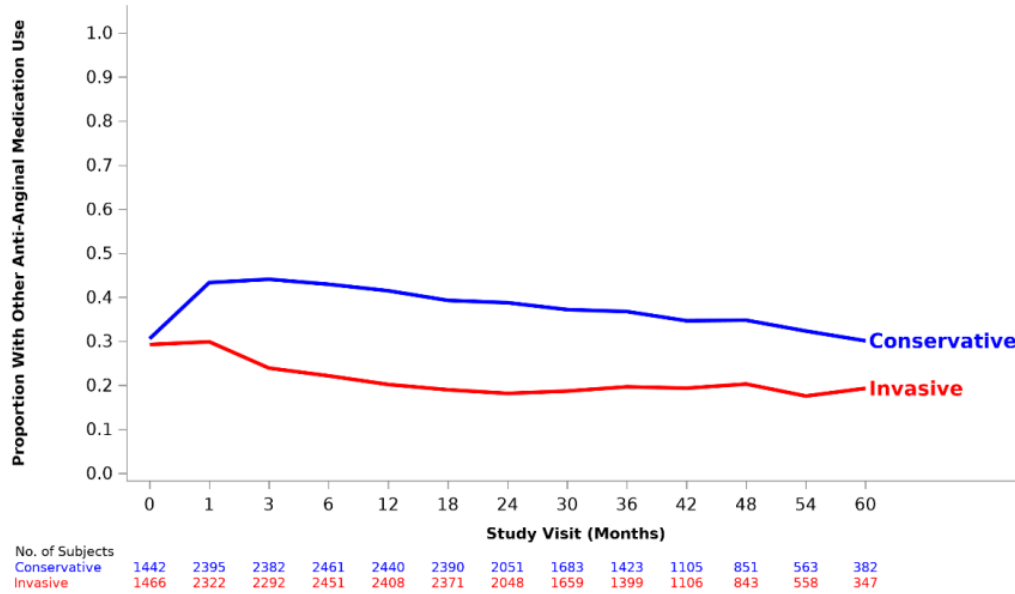

Includes long-acting nitrates

## Dual Antiplatelet (DAPT)

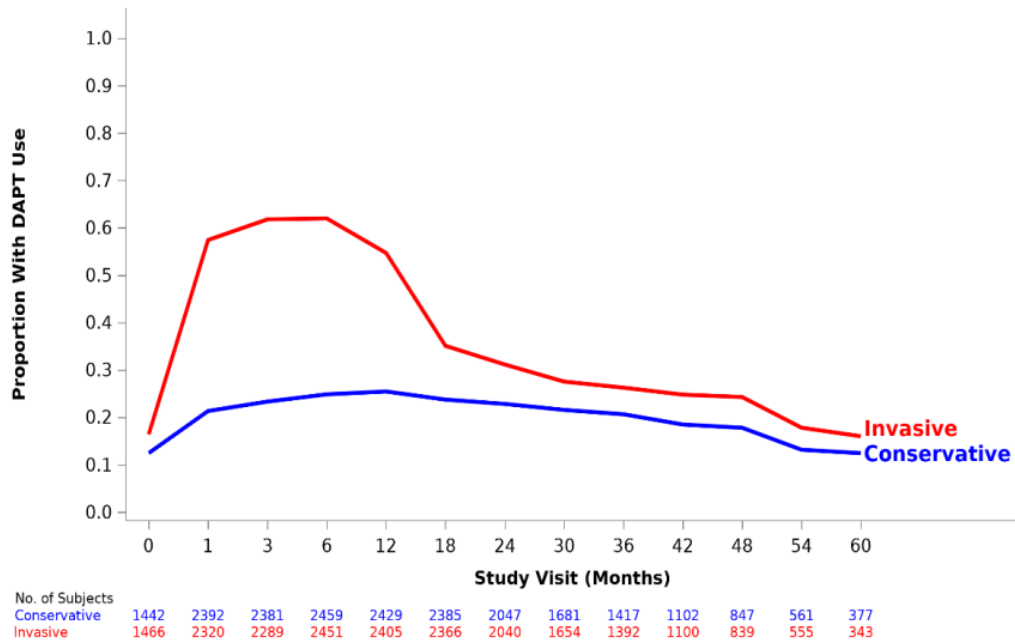

DAPT use is defined as the use of aspirin and another antiplatelet medication.



Figure S5. Dual Antiplatelet Therapy After PCI in Invasive Strategy Participants

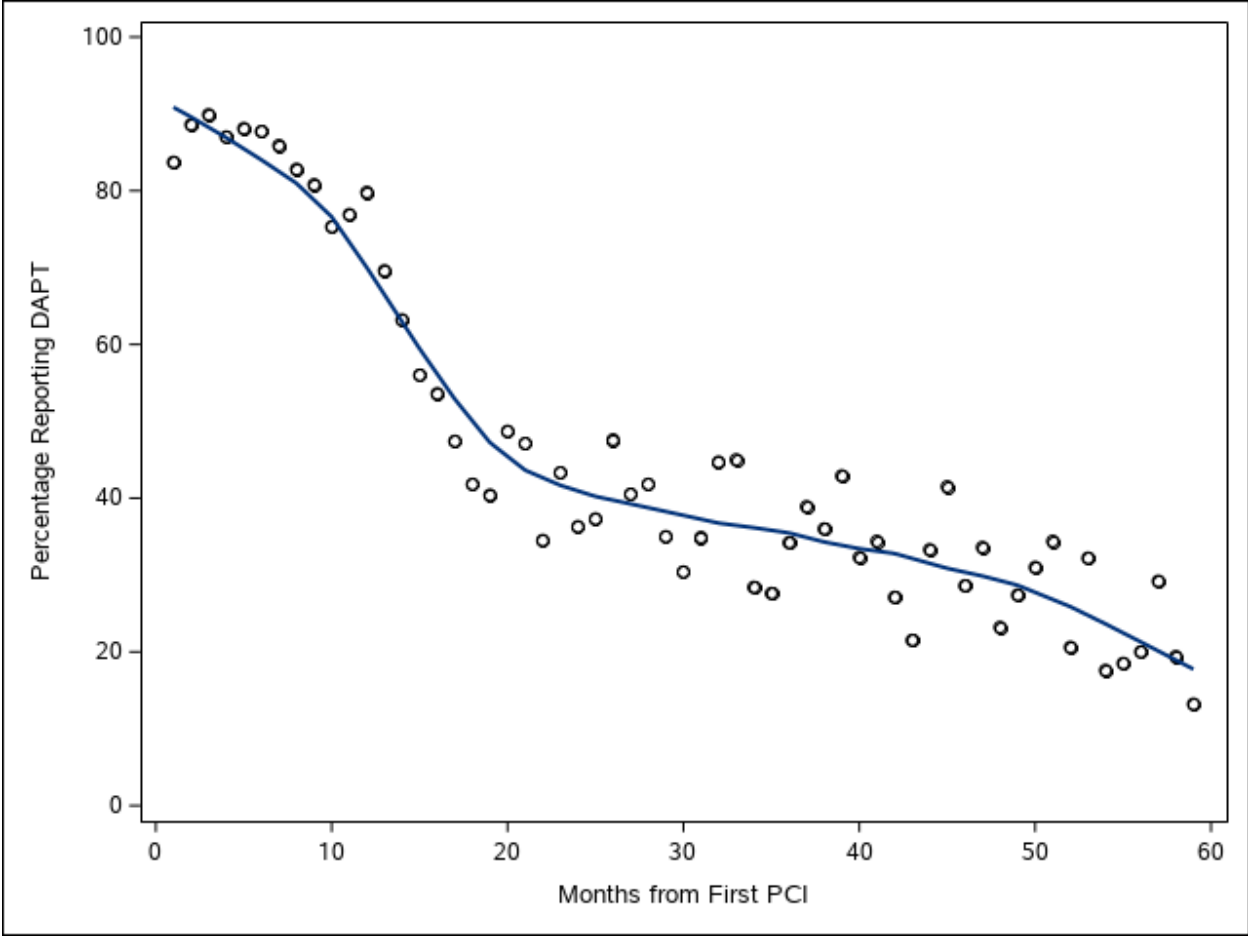

Due to timing of visits when current medication use was collected and varying DAPT duration, it does not reflect 100% DAPT use, which we believe was universal. Collection of information at follow-up visits may have occurred after completion of prescribed course of DAPT.

Figure S6a. Cumulative Incidence Plot of Cardiac Catheterization by Treatment Group.

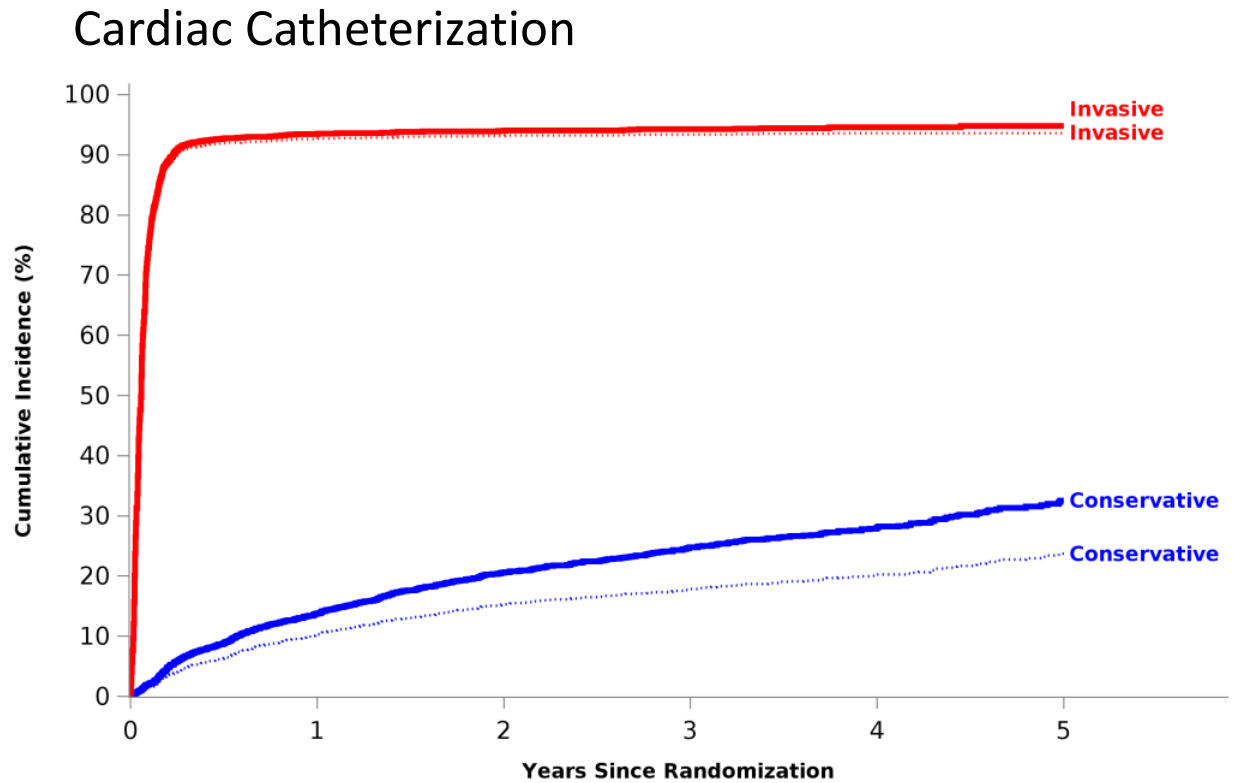

The dotted lines represent procedures not preceded by outcome events. When counting catheterizations performed prior to randomization that were not repeated prior to CABG in INV participants, 95% of INV patients had a catheterization prior to a primary outcome event. A total of 2475/2588 (96%) of INV participants had catheterization or revascularization for any reason, consistent with protocol adherence.

Figure S6b. Cumulative Incidence Plot of Revascularization by Treatment Group.

### Revascularization

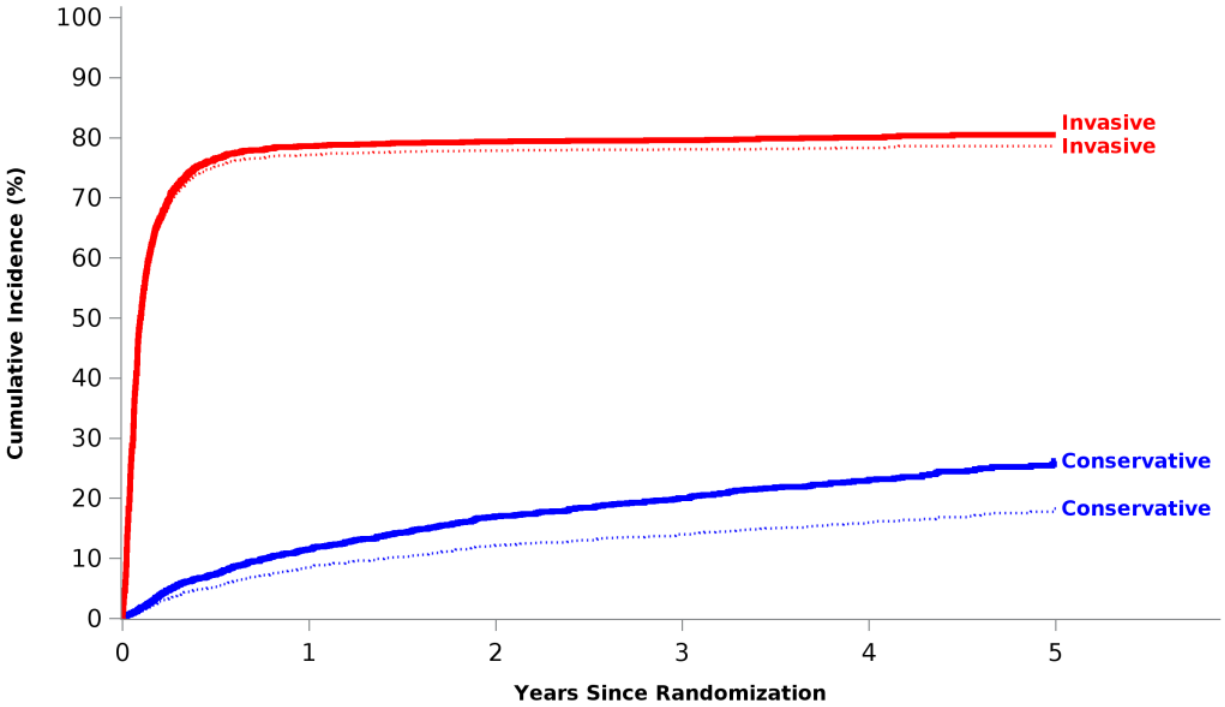

The dotted lines represent procedures not preceded by outcome events.

Figure S7. Estimated Instantaneous Hazard Rates

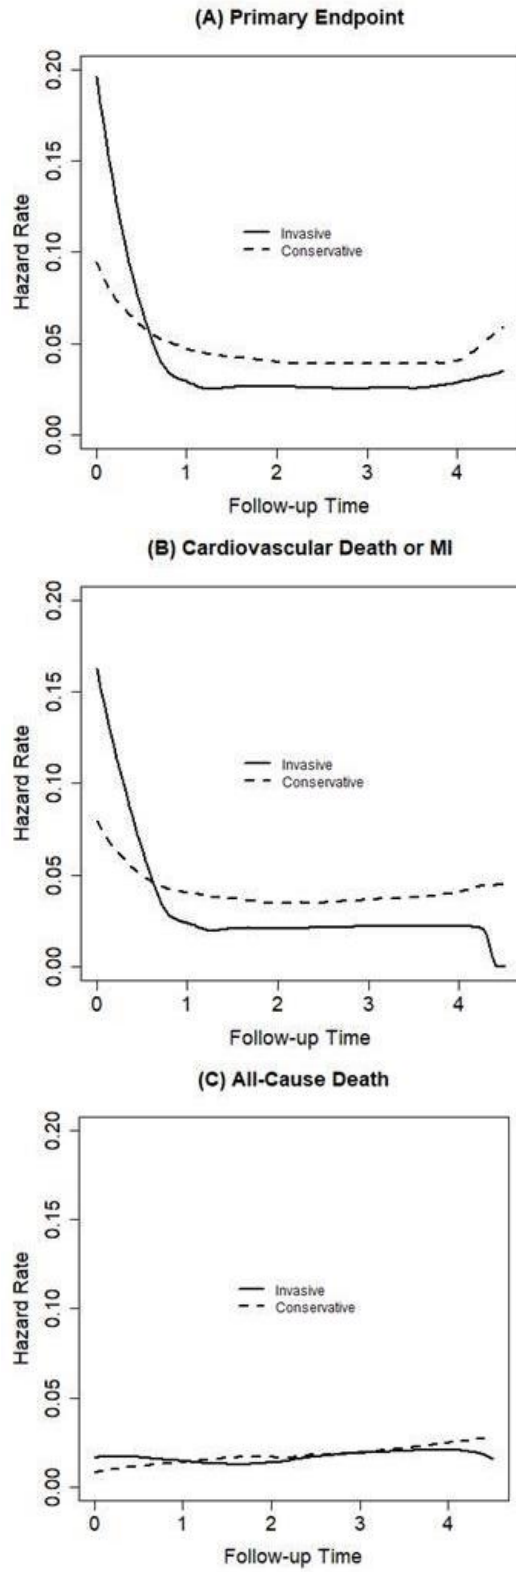

**Figure S8. The following figures are time-to-event curves shown in Figure 2, Individual components of the primary outcome not shown in Figure 2, and other outcomes including net clinical benefit. These figures have insets displaying the half width of the confidence interval for the difference between treatment groups. Overlap of the lines and shading indicates that the 95% CI for the difference includes zero. are also shown.**

**Additional Analyses to be Reported Separately**

As stated in the SAP, additional pre-specified secondary outcomes will be analyzed, and they will be reported separately:

- (a) Composite of cardiovascular death or complicated MI as defined in the CEC charter
- (b) Complicated MI as defined in the CEC charter
- (c) Large MI

Other outcomes as defined in the SAP to be reported separately to aid interpretation of the trial's primary and secondary analyses include:

- (a) Composite of all-cause death or nonfatal MI
- (b) Composite of all-cause death, nonfatal MI, or stroke
- (c) Composite of all-cause death, nonfatal MI, or hospitalization for resuscitated cardiac arrest, unstable angina or heart failure
- (d) Composite of all-cause death, nonfatal MI, stroke, hospitalization for unstable angina, heart failure or resuscitated cardiac arrest

Figure S8. Rates of the Primary Outcome Components and Other Outcomes

Shading in inset figures indicates the half width of the confidence interval for the difference. Overlap of the lines and shading indicates that the 95% CI for the difference includes zero.

**Primary Outcome (composite of Cardiovascular Death, Myocardial Infarction, or Hospitalization for Unstable Angina, Heart Failure, or Resuscitated Cardiac Arrest)**

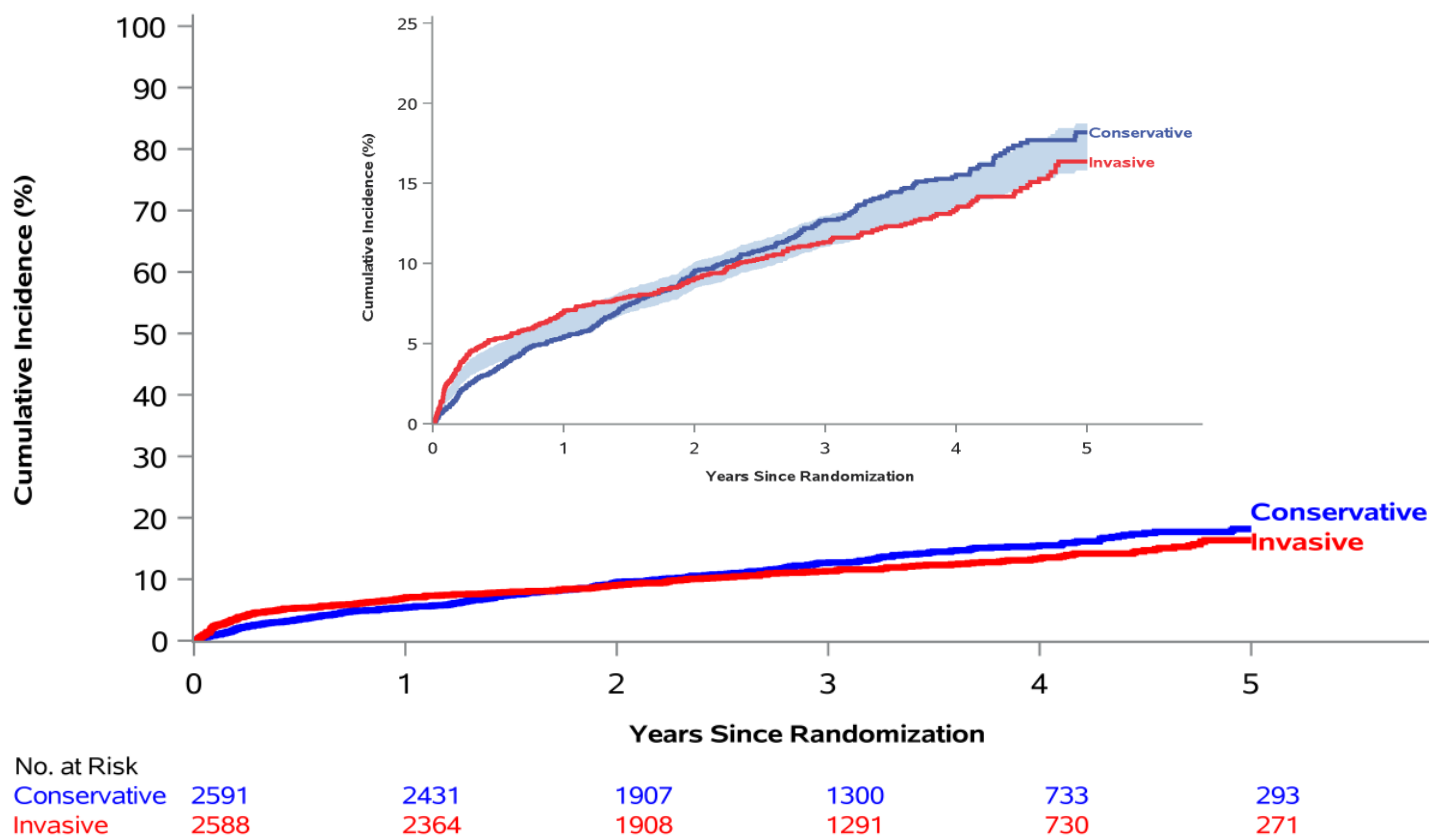

## Cardiovascular Death or Myocardial Infarction

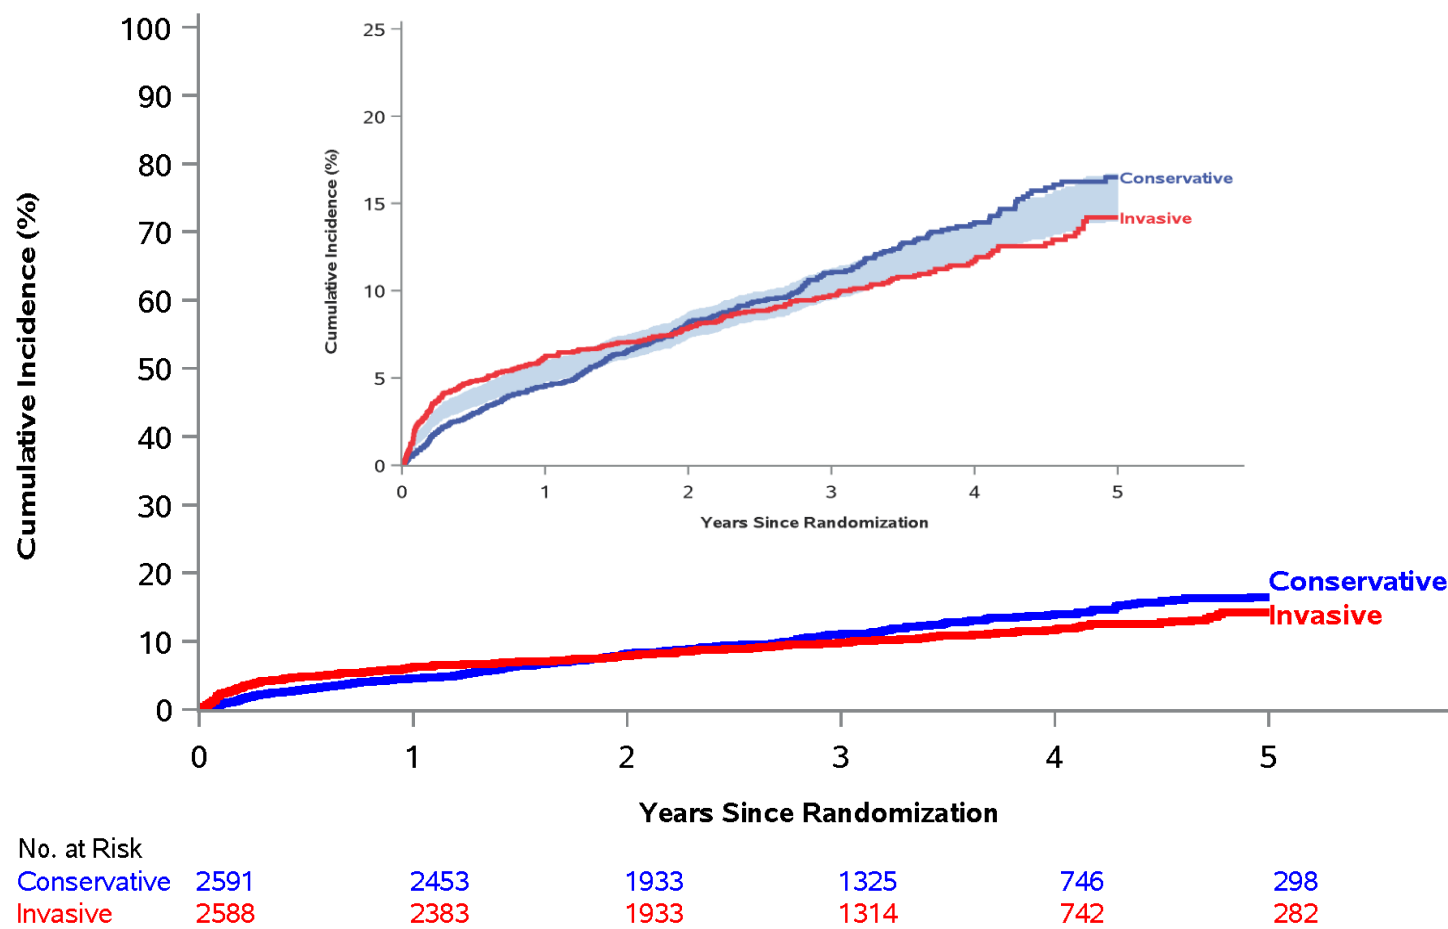

## All-cause Mortality

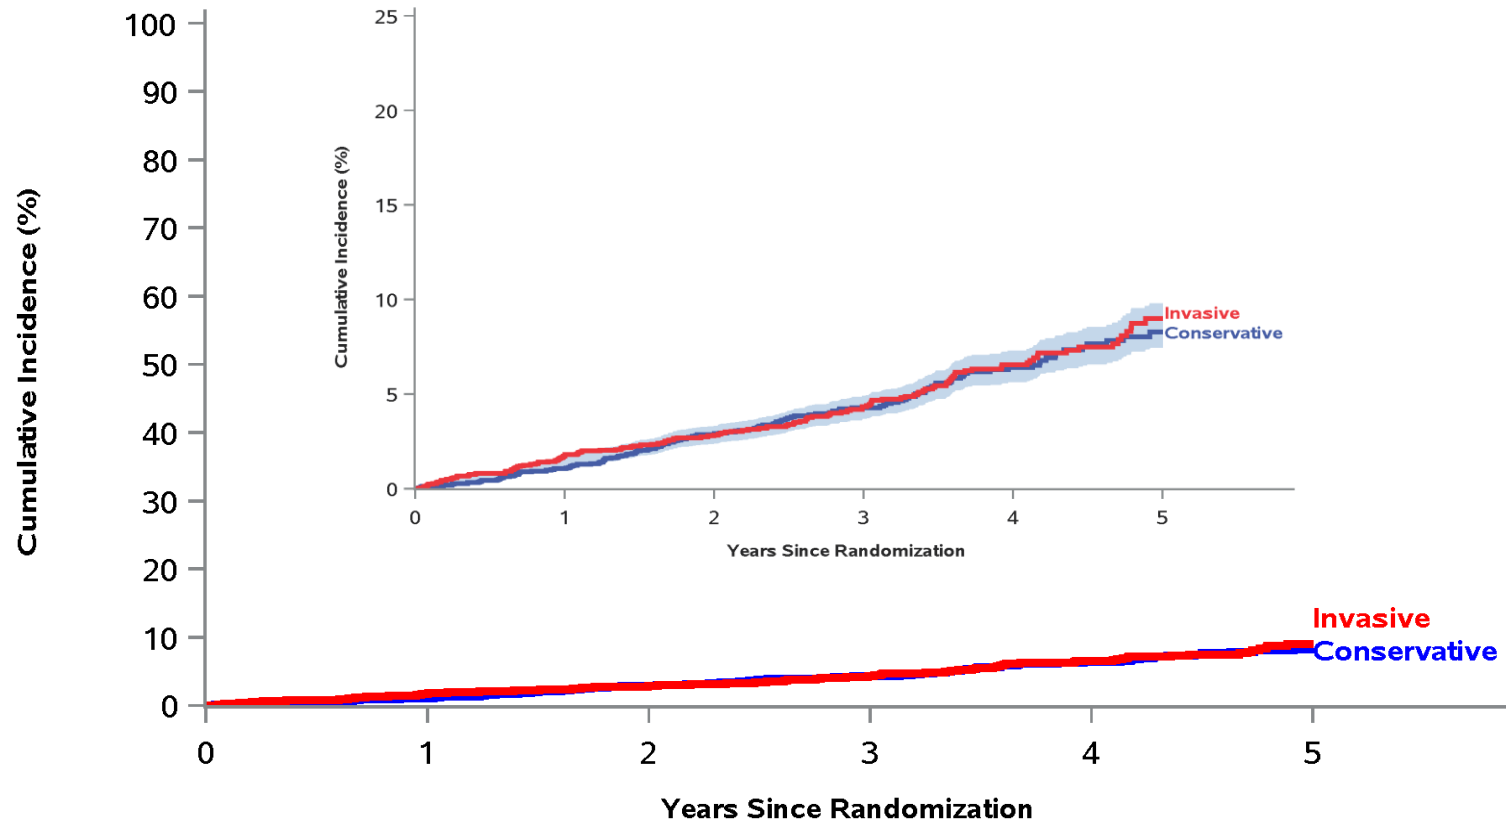

| No. at Risk  |      | Years Since Randomization |      |      |     |     |
|--------------|------|---------------------------|------|------|-----|-----|
| Conservative | 2591 | 2548                      | 2065 | 1445 | 844 | 349 |
| Invasive     | 2588 | 2518                      | 2061 | 1431 | 827 | 317 |



# Myocardial Infarction

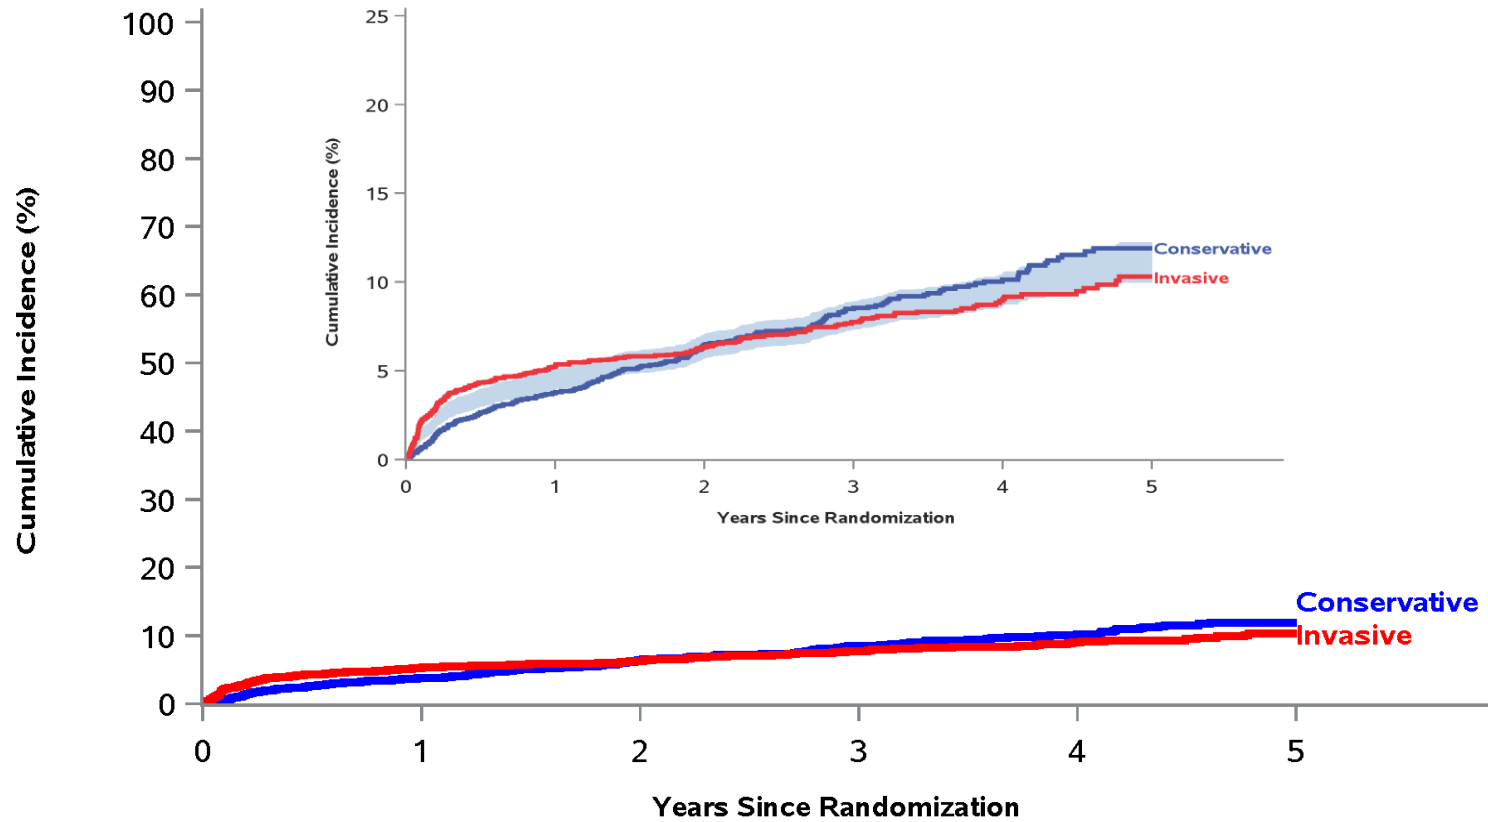

| No. at Risk  |      | Years Since Randomization |      |      |     |     |
|--------------|------|---------------------------|------|------|-----|-----|
| Conservative | 2591 | 2452                      | 1931 | 1321 | 747 | 298 |
| Invasive     | 2588 | 2379                      | 1931 | 1313 | 742 | 283 |

## Cardiovascular Death

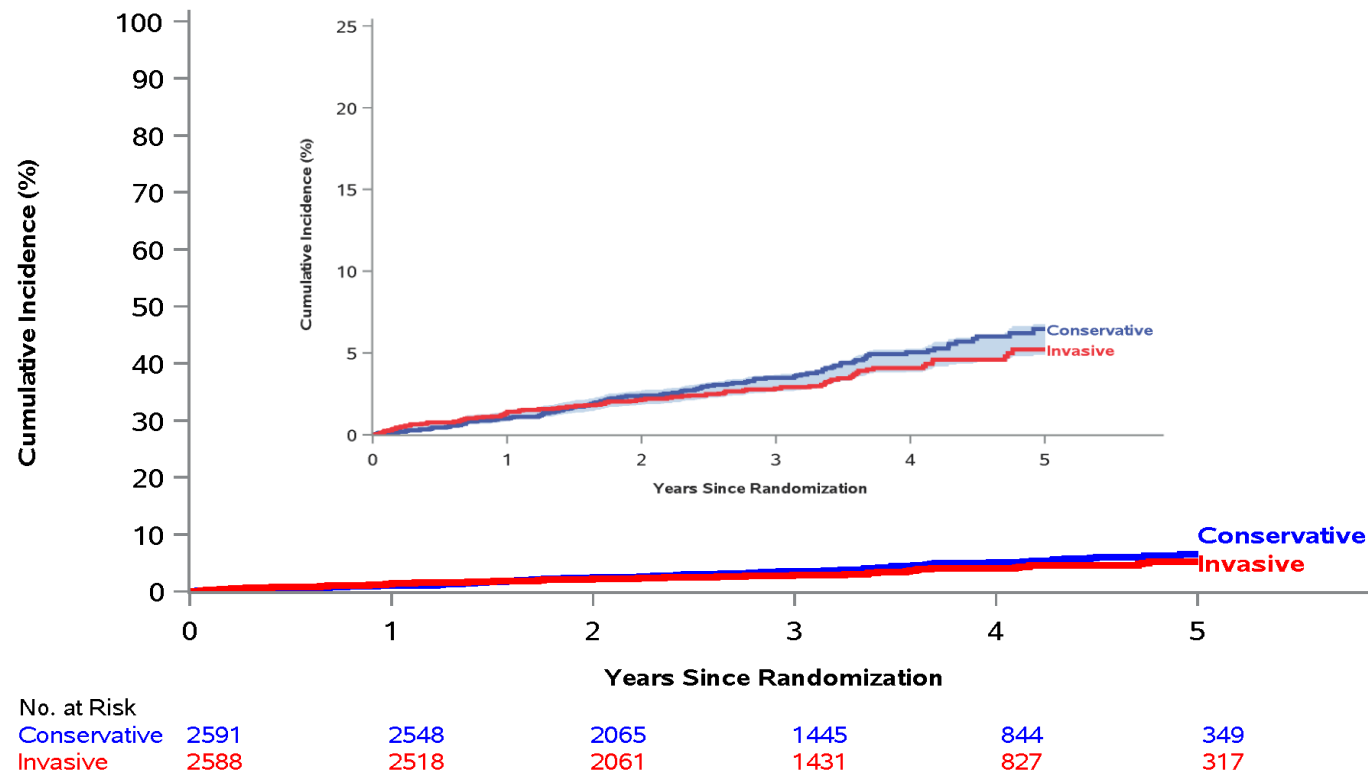

# Procedural MI

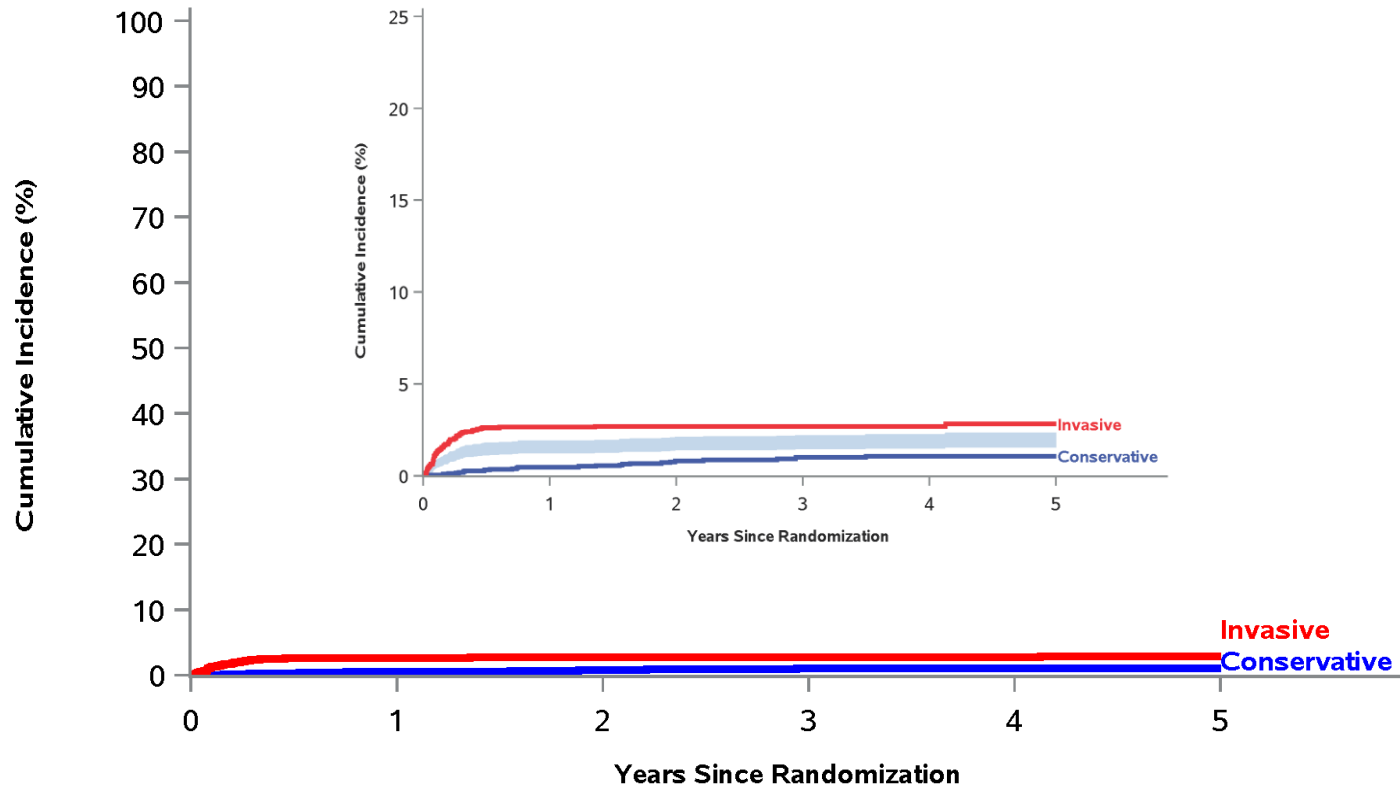

| No. at Risk  | 0    | 1    | 2    | 3    | 4   | 5   |
|--------------|------|------|------|------|-----|-----|
| Conservative | 2591 | 2529 | 2035 | 1419 | 828 | 342 |
| Invasive     | 2588 | 2439 | 2000 | 1380 | 794 | 304 |

## Non-procedural MI

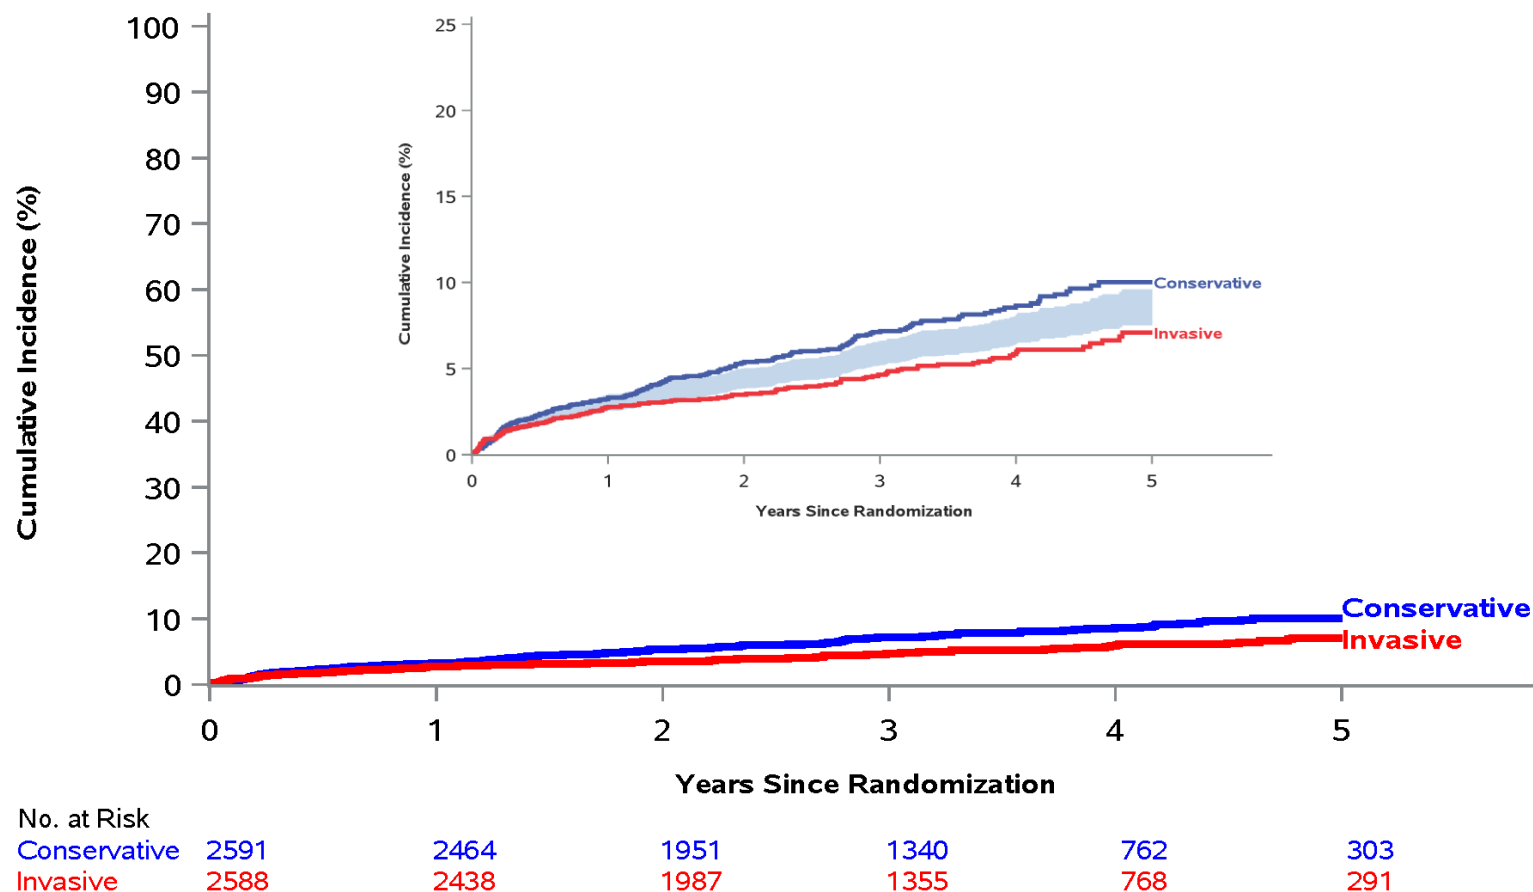

HR<sub>adj</sub> for invasive vs. conservative: 0.67 (95% CI: 0.53 to 0.83). Diagnosis of nonprocedural MI was defined as Type 1, 2, 4b, or 4c myocardial infarction. See Definitions of Outcomes in Supplementary Methods.

### Hospitalization for unstable angina

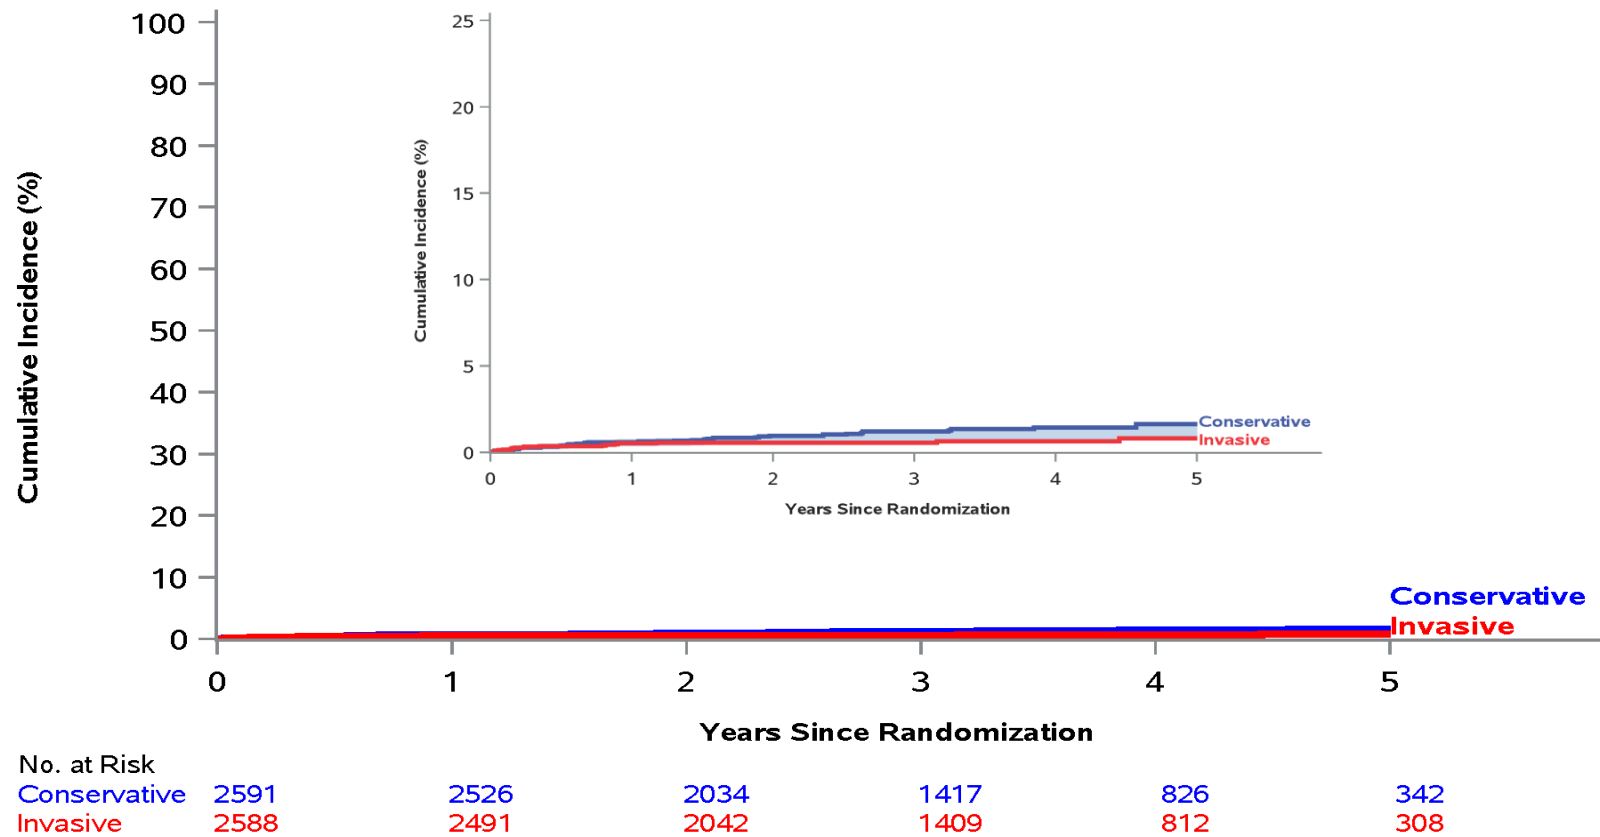

HR<sub>adj</sub> for invasive vs. conservative: 0.50 (95% CI: 0.27 to 0.91).

## Hospitalization for heart failure

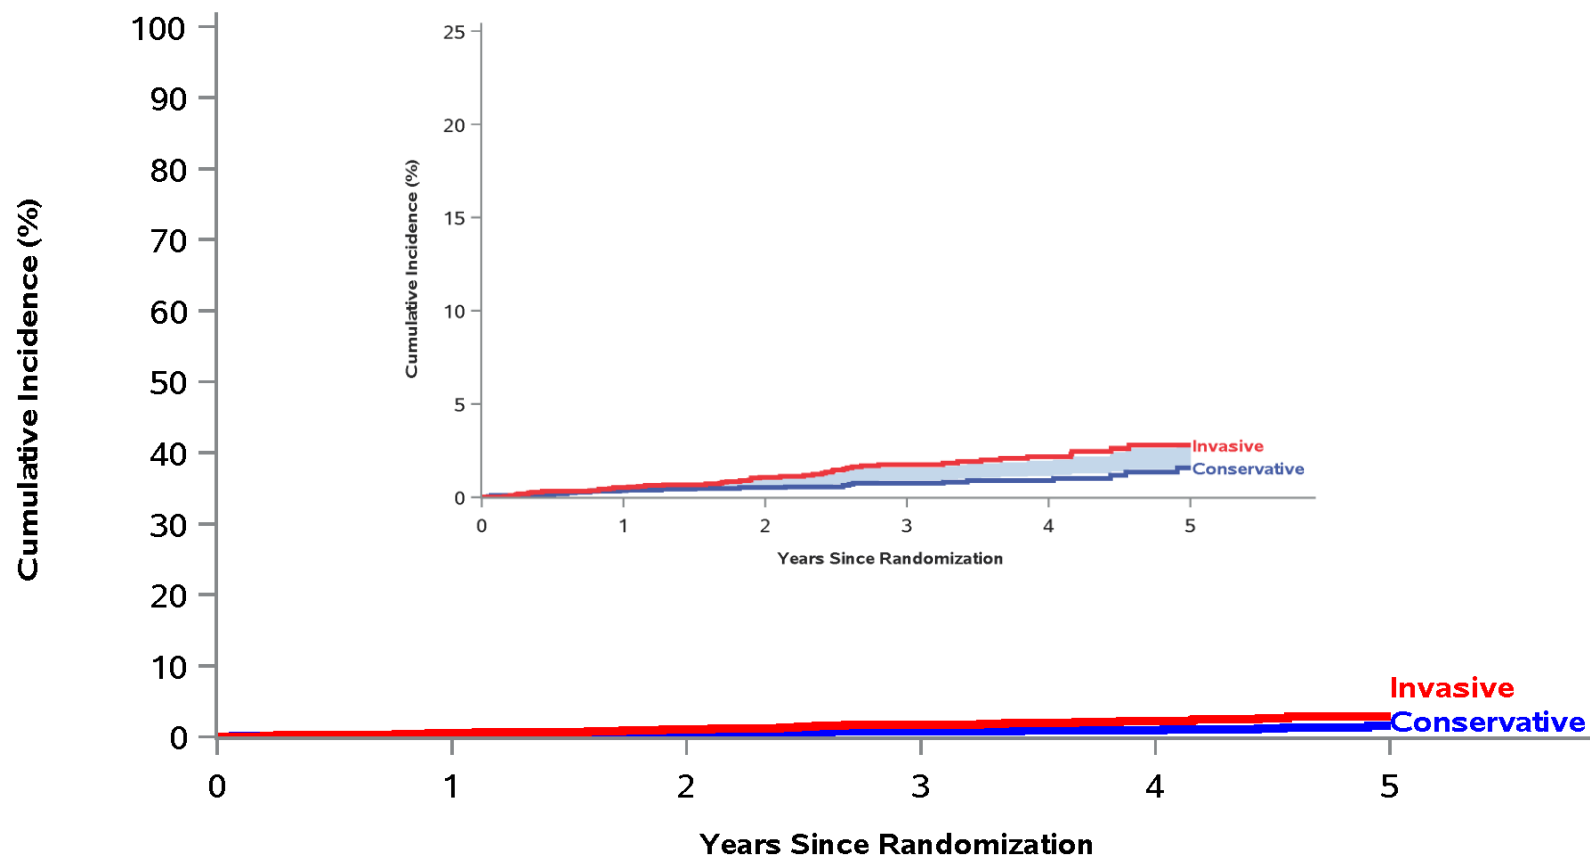

| No. at Risk  |      | Years Since Randomization |      |      |     |     |  |
|--------------|------|---------------------------|------|------|-----|-----|--|
| Conservative | 2591 | 2535                      | 2044 | 1424 | 834 | 345 |  |
| Invasive     | 2588 | 2494                      | 2031 | 1397 | 807 | 302 |  |

HR<sub>adj</sub> for invasive vs. conservative: 2.23 (95% CI: 1.38 to 3.61).

### Hospitalization for resuscitated cardiac arrest

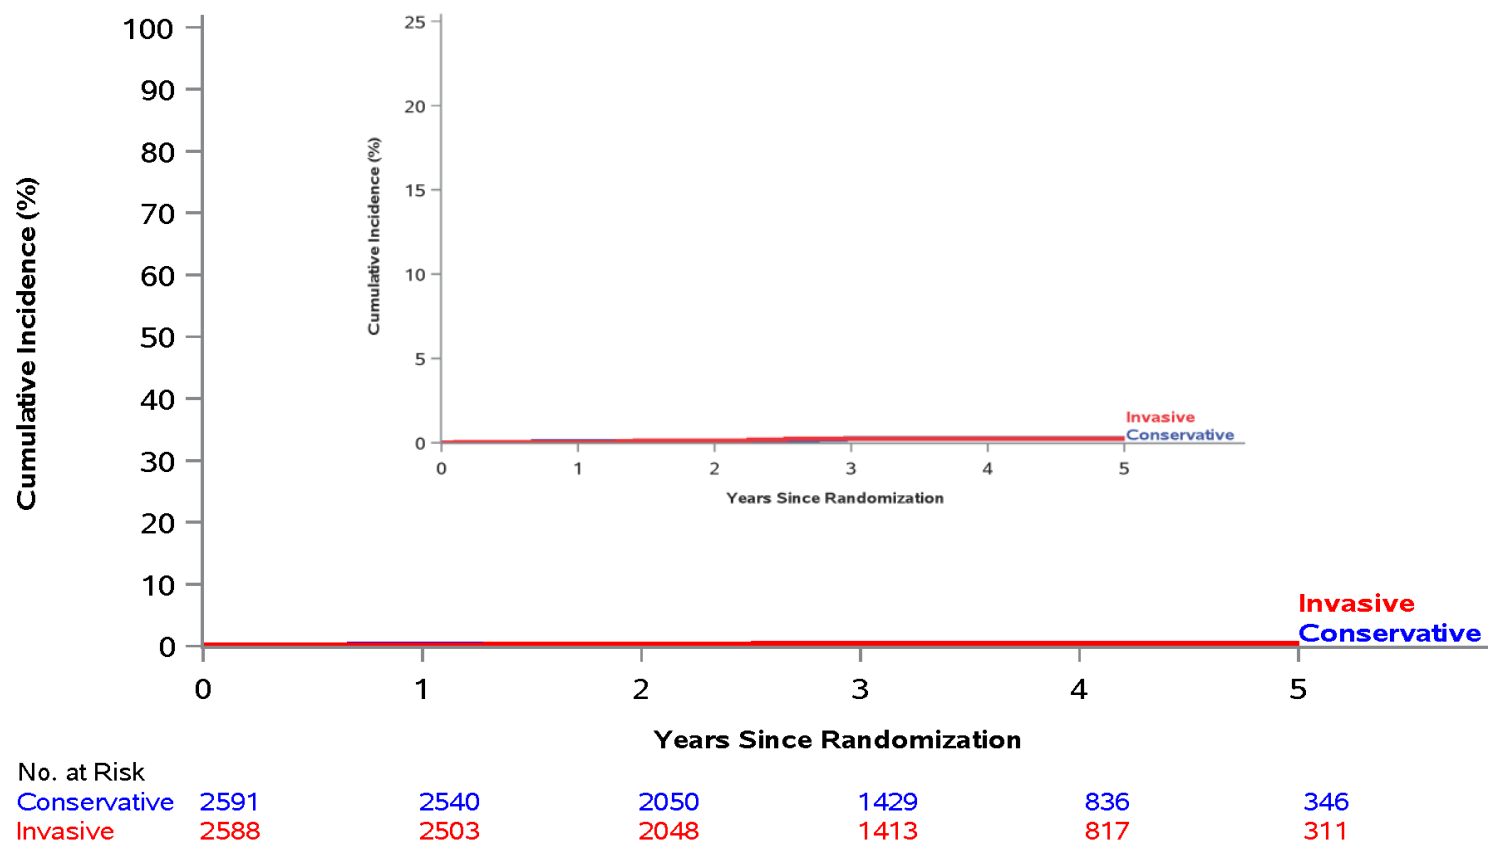

HR<sub>adj</sub> for invasive vs. conservative: 1.01 (95% CI: 0.29 to 3.49).

# Stroke

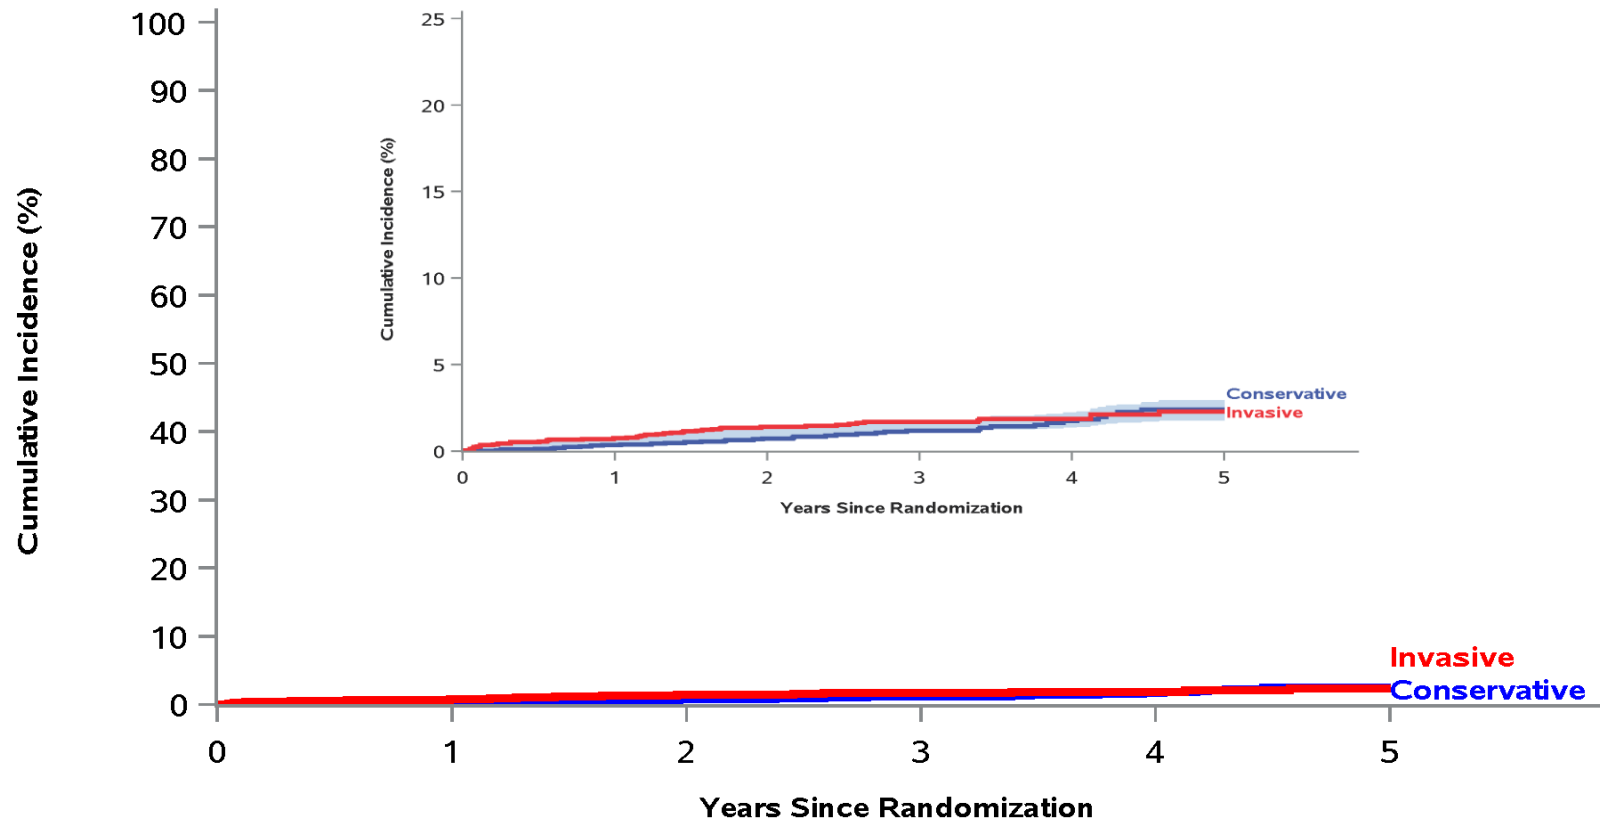

| No. at Risk  |      | 0    | 1    | 2    | 3   | 4   | 5 |
|--------------|------|------|------|------|-----|-----|---|
| Conservative | 2591 | 2533 | 2038 | 1416 | 831 | 341 |   |
| Invasive     | 2588 | 2486 | 2027 | 1391 | 807 | 309 |   |



Net Clinical Benefit: CV Death, MI, UA, HF, RCA, Stroke

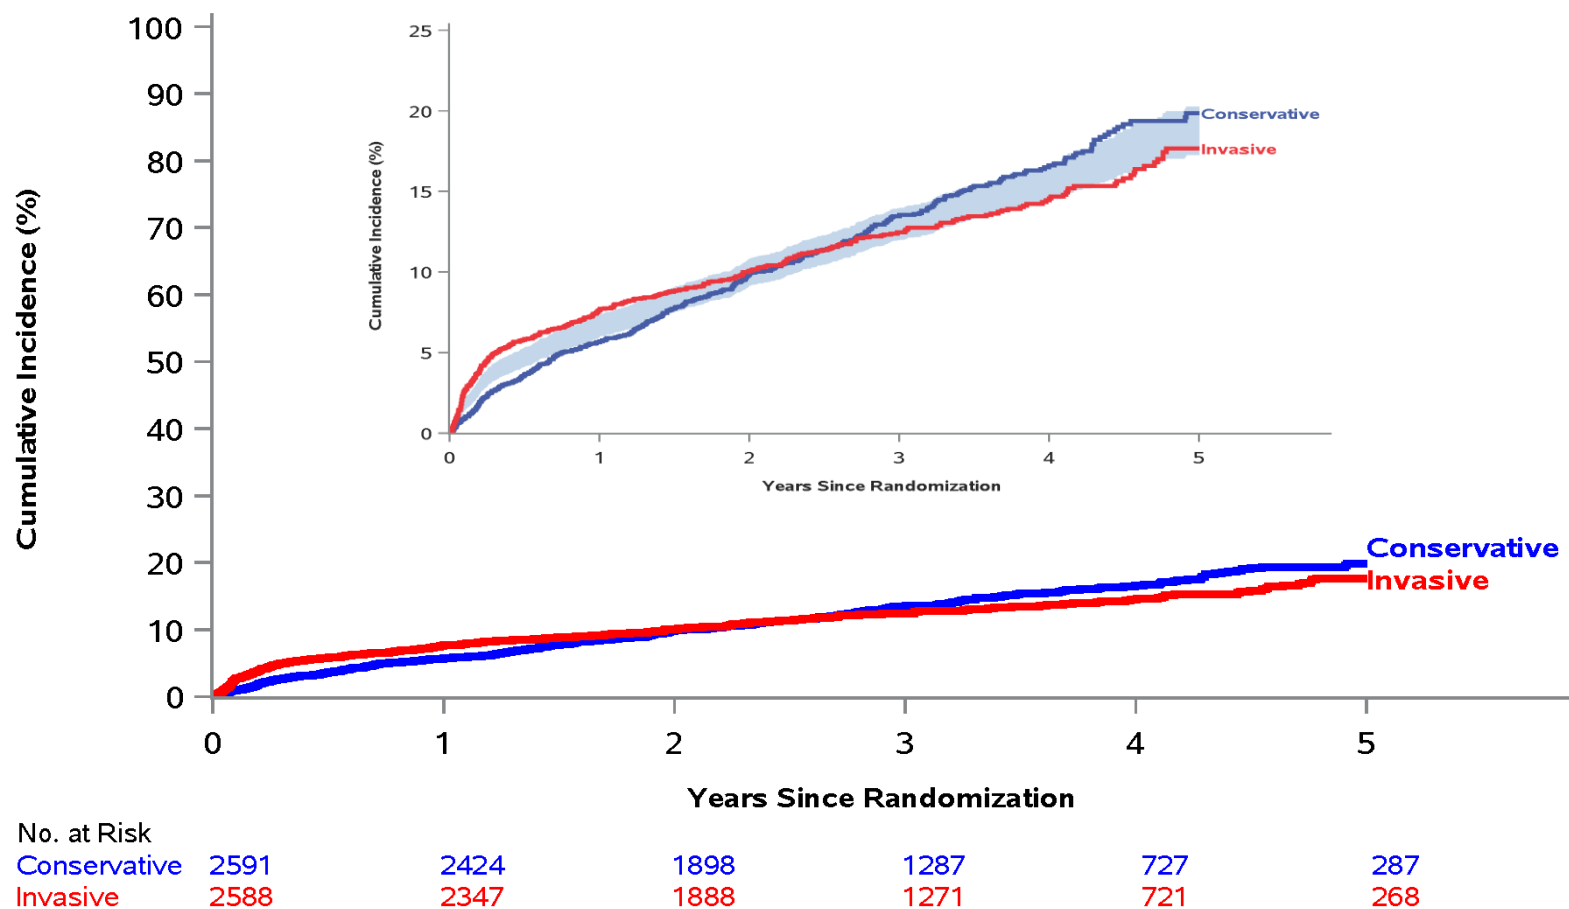

Net clinical benefit: cardiovascular death; myocardial infarction; hospitalization for unstable angina, heart failure, resuscitated cardiac arrest; or stroke.

CV Death/MI/Stroke

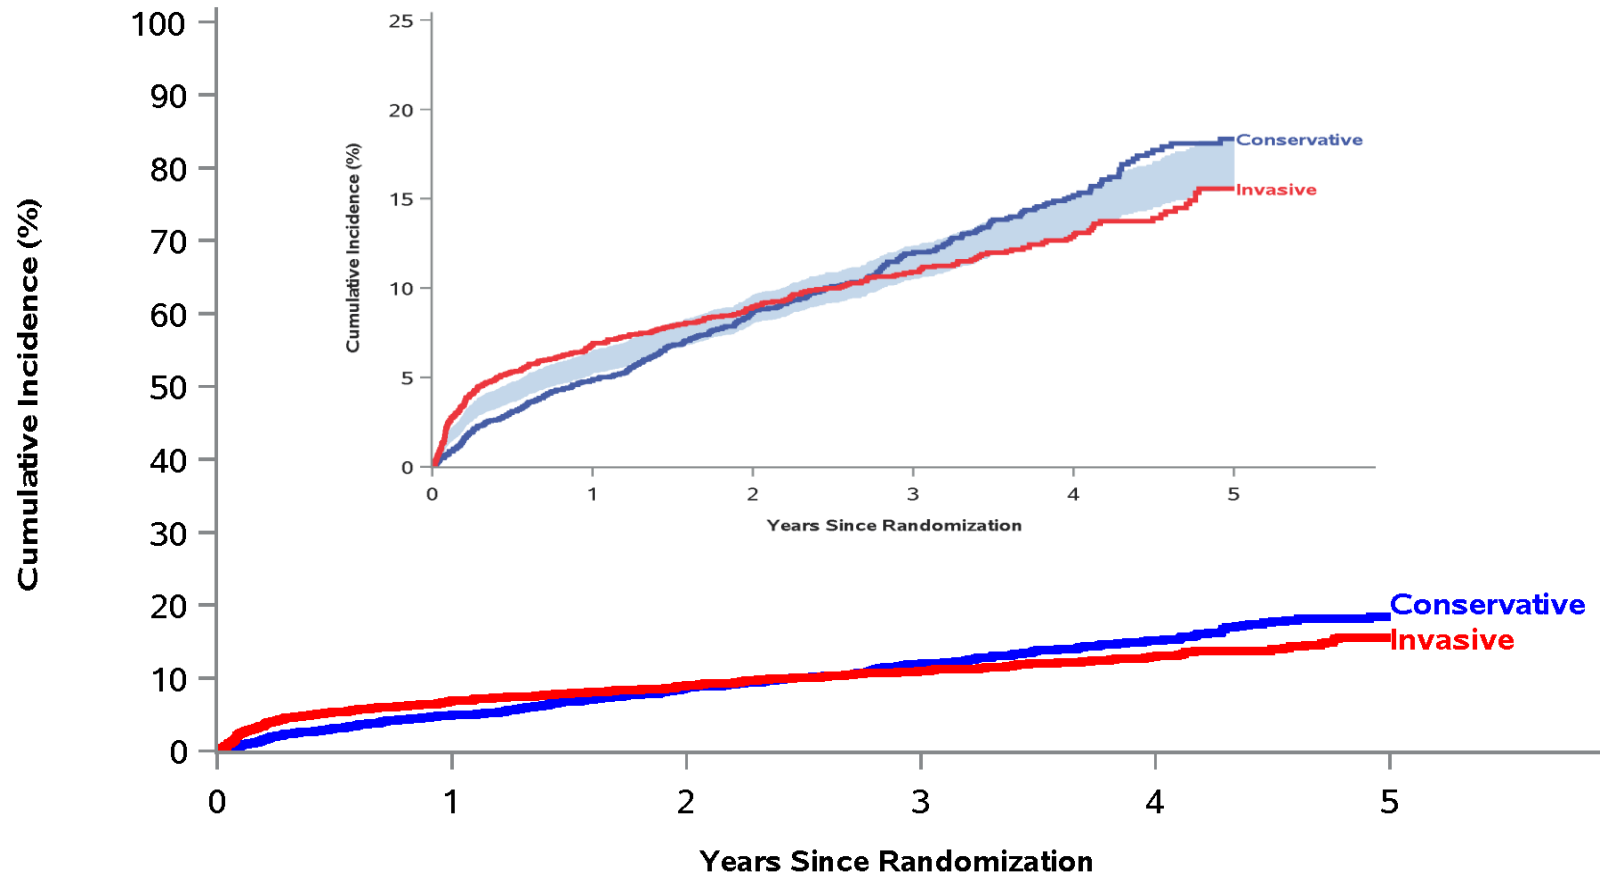

| No. at Risk  |      | Years Since Randomization |      |      |     |     |
|--------------|------|---------------------------|------|------|-----|-----|
| Conservative | 2591 | 2445                      | 1922 | 1310 | 740 | 291 |
| Invasive     | 2588 | 2366                      | 1912 | 1292 | 733 | 279 |

Figure S9. Time-to-Event Curves for the Primary Composite Outcome Using the Secondary Definition of MI

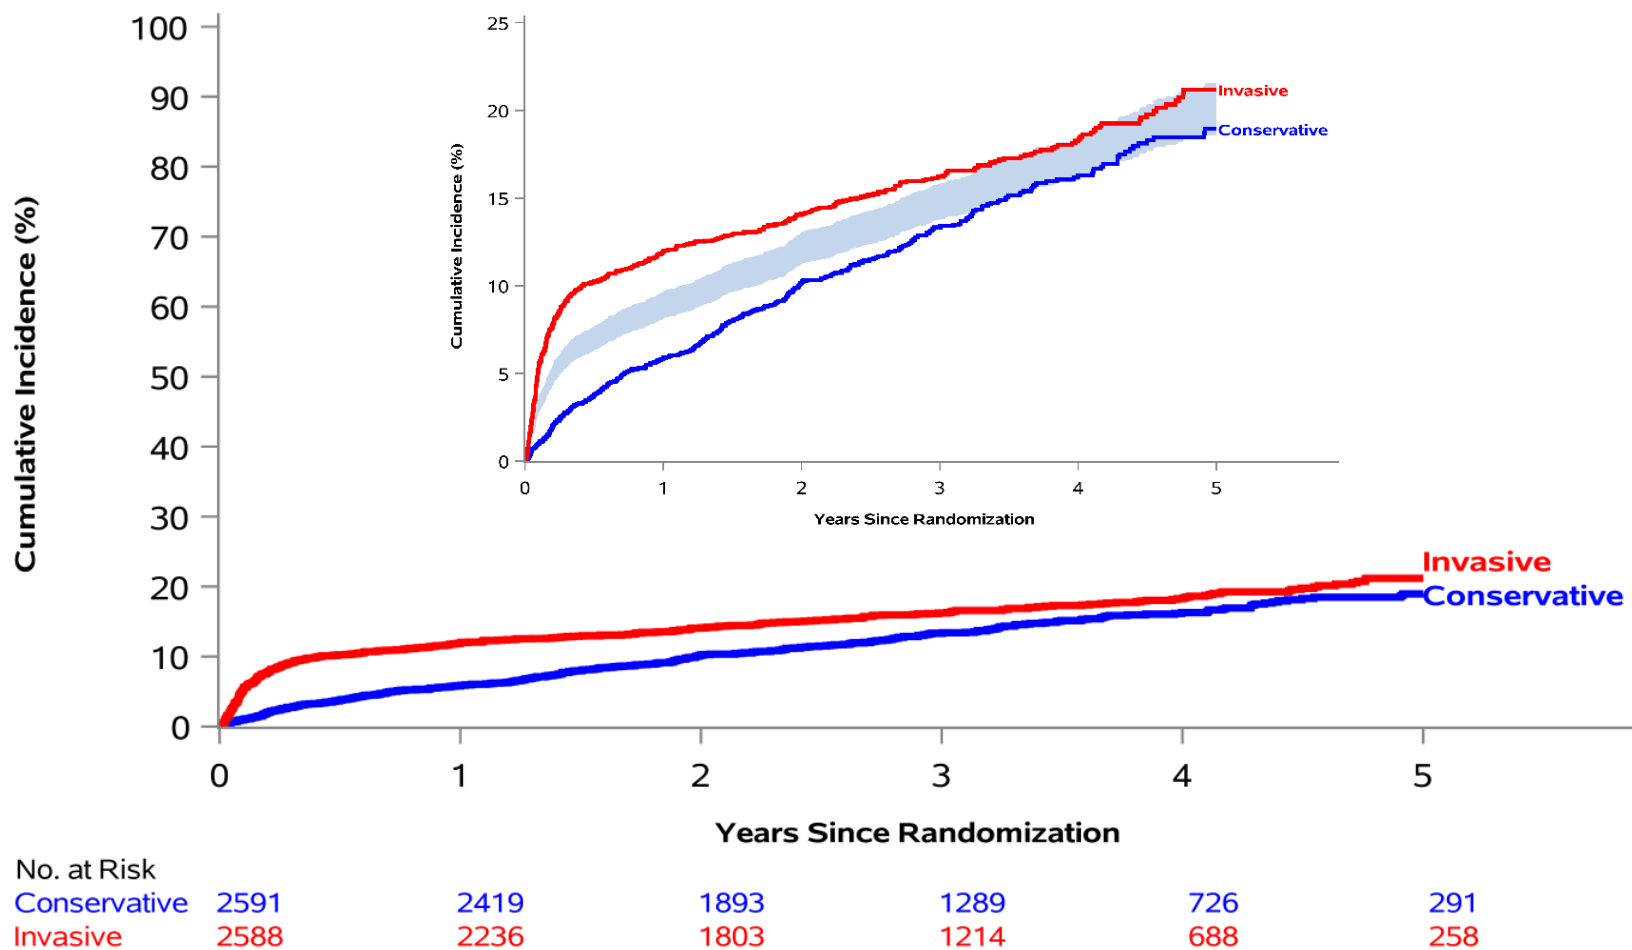

Shading in inset figure indicates the half width of the confidence interval for the difference. Overlap of the lines and shading indicates that the 95% CI for the difference includes zero.

Figures S10a-10i. Posterior Distribution of Difference in Cumulative Event Rate at 1, 3, and 5 Years

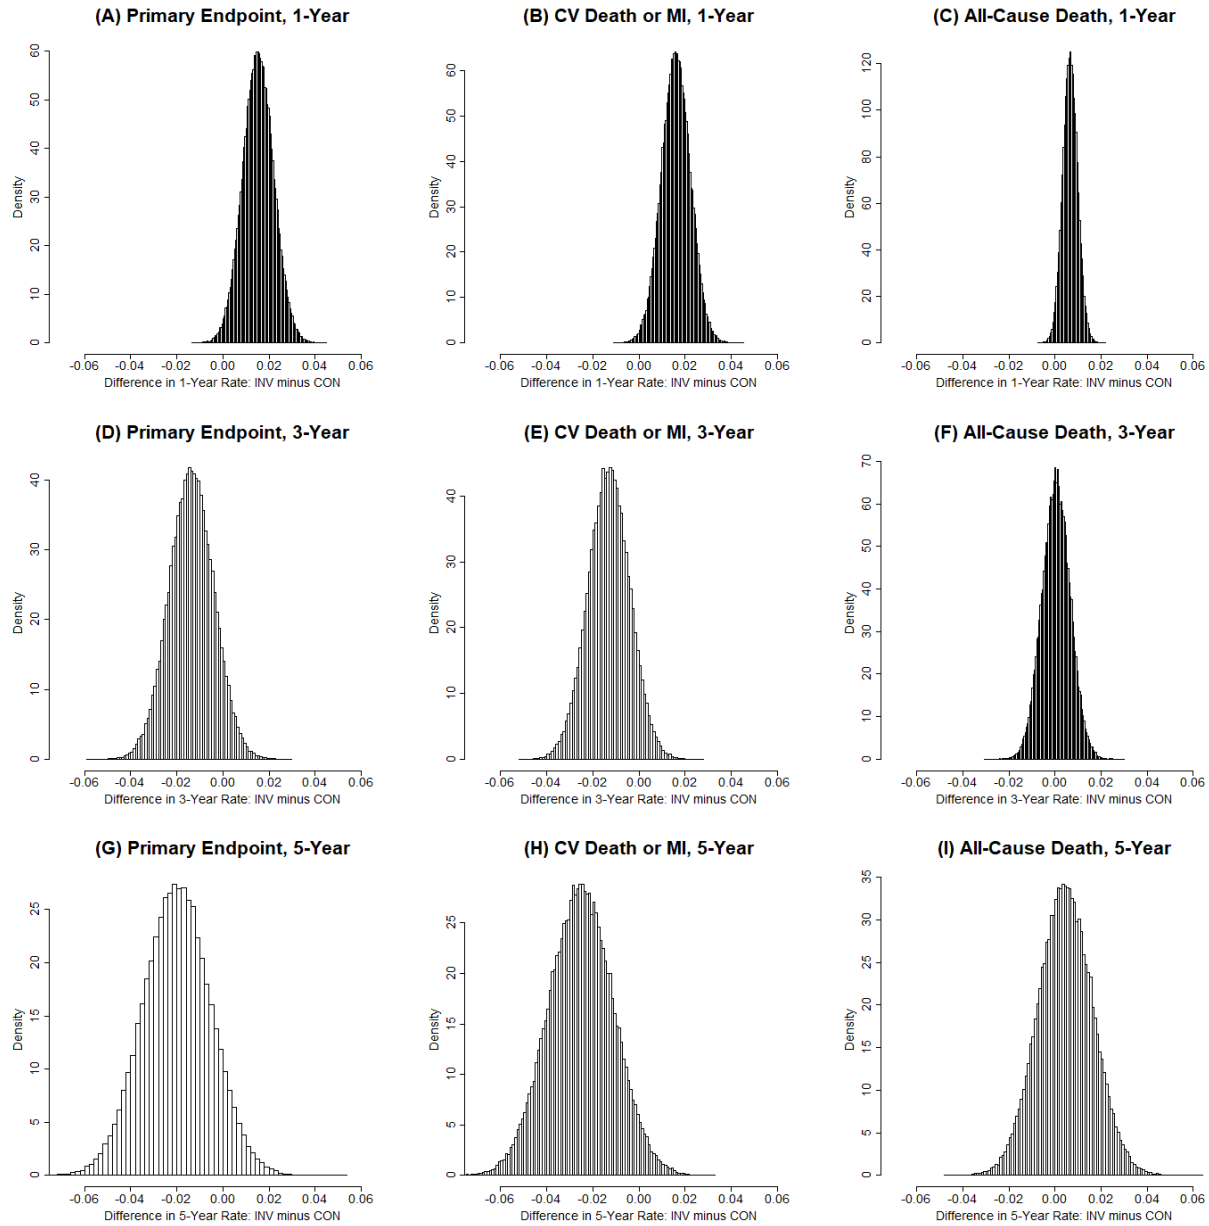

Note: Cumulative event rates are expressed as proportions ranging from 0 to 1.

Interpretation: The probability that the true difference falls in a narrow interval is proportional to the height of the bar around that interval.

## V. Supplementary Tables

### Table S1. Participant Eligibility Criteria

\* ISCHEMIA Protocol Version 2.0

|                                                                                                                                                                                                                                                                                                                                                                                                                                                                                                                                                                                                                                                                                                                                                                                                                                                                                                                                                                                                                                                                                                                                                                                                                                                                                                                                                                                                                                                                                                                                                                                                                                                                                                                                                                                                                                                                                                                                                                                                                                                                                                                                                                                                                                                                                                                                                                                                                                                                    |
|--------------------------------------------------------------------------------------------------------------------------------------------------------------------------------------------------------------------------------------------------------------------------------------------------------------------------------------------------------------------------------------------------------------------------------------------------------------------------------------------------------------------------------------------------------------------------------------------------------------------------------------------------------------------------------------------------------------------------------------------------------------------------------------------------------------------------------------------------------------------------------------------------------------------------------------------------------------------------------------------------------------------------------------------------------------------------------------------------------------------------------------------------------------------------------------------------------------------------------------------------------------------------------------------------------------------------------------------------------------------------------------------------------------------------------------------------------------------------------------------------------------------------------------------------------------------------------------------------------------------------------------------------------------------------------------------------------------------------------------------------------------------------------------------------------------------------------------------------------------------------------------------------------------------------------------------------------------------------------------------------------------------------------------------------------------------------------------------------------------------------------------------------------------------------------------------------------------------------------------------------------------------------------------------------------------------------------------------------------------------------------------------------------------------------------------------------------------------|
| <p><b>Inclusion Criteria (at enrollment)</b></p> <ol style="list-style-type: none"><li>1. At least moderate ischemia on a qualifying stress test</li><li>2. Participant is willing to give informed consent</li><li>3. Age <math>\geq</math> 21 years</li></ol>                                                                                                                                                                                                                                                                                                                                                                                                                                                                                                                                                                                                                                                                                                                                                                                                                                                                                                                                                                                                                                                                                                                                                                                                                                                                                                                                                                                                                                                                                                                                                                                                                                                                                                                                                                                                                                                                                                                                                                                                                                                                                                                                                                                                    |
| <p><b>Exclusion Criteria</b></p> <ol style="list-style-type: none"><li>1. LVEF <math>&lt;</math>35%</li><li>2. History of unprotected left main stenosis <math>\geq</math>50% on prior CCTA or prior cardiac catheterization (if available)</li><li>3. Finding of “no obstructive coronary artery disease” (<math>&lt;</math>50% stenosis in all major epicardial vessels) on prior CCTA or prior catheterization, performed within 12 months</li><li>4. Coronary anatomy unsuitable for either PCI or CABG</li><li>5. Unacceptable level of angina despite maximal medical therapy</li><li>6. Very dissatisfied with medical management of angina</li><li>7. History of noncompliance with medical therapy</li><li>8. Acute coronary syndrome within the previous 2 months</li><li>9. PCI within the previous 12 months</li><li>10. Stroke within the previous 6 months or spontaneous intracranial hemorrhage at any time</li><li>11. History of ventricular tachycardia requiring therapy for termination, or symptomatic sustained ventricular tachycardia not due to a transient reversible cause</li><li>12. NYHA class III-IV heart failure at entry or hospitalization for exacerbation of chronic heart failure within the previous 6 months</li><li>13. Non-ischemic dilated cardiomyopathy or hypertrophic cardiomyopathy</li><li>14. End stage renal disease on dialysis or estimated glomerular filtration rate <math>&lt;</math>30 ml/min (not an exclusion criterion for CKD ancillary trial, see CKD ancillary trial)</li><li>15. Severe valvular disease or valvular disease likely to require surgery or percutaneous valve replacement during the trial</li><li>16. Allergy to radiographic contrast that cannot be adequately pre-medicated, or any prior anaphylaxis to radiographic contrast</li><li>17. Planned major surgery necessitating interruption of dual antiplatelet therapy (note that patients may be eligible after planned surgery)</li><li>18. Life expectancy less than the duration of the trial due to non-cardiovascular comorbidity</li><li>19. Pregnancy (known to be pregnant; to be confirmed pre-CCTA and/or randomization, if applicable)</li><li>20. Patient who, in the judgment of the patient’s physician, is likely to have significant unprotected left main stenosis (those who are able to undergo CCTA will have visual assessment of the left main coronary artery by the CCTA core laboratory)</li></ol> |

21. Enrolled in a competing trial that involves a non-approved cardiac drug or device
22. Inability to comply with the protocol
23. Exceeds the weight or size limit for CCTA or cardiac catheterization at the site
24. Canadian Cardiovascular Society Class III angina of recent onset, or angina of any class with a rapidly progressive or accelerating pattern
25. Canadian Cardiovascular Society Class IV angina, including unprovoked rest angina
26. High risk of bleeding which would contraindicate the use of dual antiplatelet therapy
27. Cardiac transplant recipient
28. Prior CABG, unless CABG was performed more than 12 months ago and coronary anatomy has been demonstrated to be suitable for PCI or CABG to accomplish complete revascularization of ischemic areas (CCC approval required)

Table S2. Ischemia Eligibility Criteria by Stress Test Modality

| Stress Test Modality                                                         | Diagnostic criteria                                                                                                                                                                                                                                                                                                                                                                                                                                                                                                                                                                                                                                                                                                                                                                                                                                                                                                                                                      |
|------------------------------------------------------------------------------|--------------------------------------------------------------------------------------------------------------------------------------------------------------------------------------------------------------------------------------------------------------------------------------------------------------------------------------------------------------------------------------------------------------------------------------------------------------------------------------------------------------------------------------------------------------------------------------------------------------------------------------------------------------------------------------------------------------------------------------------------------------------------------------------------------------------------------------------------------------------------------------------------------------------------------------------------------------------------|
| Nuclear perfusion via SPECT or PET                                           | ≥10% myocardium ischemic <sup>1</sup>                                                                                                                                                                                                                                                                                                                                                                                                                                                                                                                                                                                                                                                                                                                                                                                                                                                                                                                                    |
| Echocardiography                                                             | ≥3/16 segments with stress-induced severe hypokinesia or akinesia                                                                                                                                                                                                                                                                                                                                                                                                                                                                                                                                                                                                                                                                                                                                                                                                                                                                                                        |
| Cardiac Magnetic Resonance                                                   | Perfusion: ≥12% myocardium ischemic, and/or Wall motion: ≥3/16 segments with stress-induced severe hypokinesia or akinesia                                                                                                                                                                                                                                                                                                                                                                                                                                                                                                                                                                                                                                                                                                                                                                                                                                               |
| Exercise Test without Imaging <sup>2</sup><br>(criteria 1-4 must all be met) | <ol style="list-style-type: none"> <li>1. Clinical history of typical angina or typical angina during the exercise test</li> <li>2. Absence of resting ST-segment depression ≥1.0 mm or confounders that render exercise ECG non-interpretable (LBBB, LVH with repolarization, pacemaker, etc.)</li> <li>3. As compared to the baseline tracing, additional exercise-induced horizontal or downsloping ST-segment depression ≥1.5 mm in 2 leads <i>or</i> ≥2.0 mm in any lead; ST-segment elevation ≥1mm in a non-infarct territory.</li> <li>4. Either of the following:               <ol style="list-style-type: none"> <li>a. Workload at which ST-segment criteria are met is not to exceed completion of stage 2 of a standard Bruce protocol or 7 METs if a non-Bruce protocol is used <i>or</i></li> <li>b. ST segment criteria are met at &lt;75% of the maximum predicted HR</li> </ol> </li> </ol> <p><i>Note: Anatomic eligibility must be confirmed</i></p> |

SPECT denotes single photon emission computed tomography; PET denotes positron emission tomography; ECG denotes electrocardiogram; LBBB denotes left bundle branch block; LVH denotes left ventricular hypertrophy; HR denotes heart rate; MET denotes metabolic equivalent of task;

Ischemia criteria across imaging modalities were selected to achieve a projected rate of CV death or MI of 5% per year.

<sup>1</sup>An expanded definition of moderate ischemia required all of the following: 1. History of typical angina, or chest pain during exercise stress. 2. Heart rate ≤75% predicted maximum. 3. Workload not greater than stage 2 of Bruce Protocol or 7 METs. 4. Nuclear imaging: ≥5% ischemic myocardium; Echocardiography: ≥2 segments with dobutamine- or exercise-induced severe hypokinesia or akinesia. The result was inclusion of 26 of 5179 randomly assigned patients who were enrolled after stress myocardial perfusion imaging and 30 of 5179 randomly assigned patients who were enrolled after stress echocardiography.

<sup>2</sup>Non-imaging exercise test criteria were developed to approximate severe ischemia, taking into account the potentially higher false positive rate. Anatomic eligibility confirmation was required and CCTA eligibility criteria were more stringent for participants enrolled using non-imaging

exercise stress tests, requiring  $\geq 70\%$  stenosis in the proximal or mid left anterior descending, proximal or mid right coronary artery, or proximal left circumflex (or circumflex equivalent).

*Adapted from American Heart Journal, 2018:124-135, ISCHEMIA Trial Research Group, Maron DJ, Hochman JS, O'Brien SM, Reynolds HR, Boden WE, Stone GW, Bangalore S, Spertus JA, Mark DB, Alexander KP, Shaw L, Berger JS, Ferguson TB Jr, William DO, Harrington RA, Rosenberg Y, International Study of Comparative Health Effectiveness with Medical and Invasive Approaches (ISCHEMIA) trial: Rationale and Design, 2018, with permission from Elsevier*



Table S3. Guideline-Based Medical Therapy Goals

| <b>RISK FACTOR</b>                   | <b>GOALS</b>                                                                                                                                                                  |
|--------------------------------------|-------------------------------------------------------------------------------------------------------------------------------------------------------------------------------|
| <b>Behavioral</b>                    |                                                                                                                                                                               |
| Smoking                              | Smoking cessation <sup>1</sup>                                                                                                                                                |
| Physical activity                    | ≥30 minutes of moderate intensity ≥5 times/week                                                                                                                               |
| Saturated fat                        | <7% calories                                                                                                                                                                  |
| <b>Physiological</b>                 |                                                                                                                                                                               |
| Blood pressure                       | Systolic blood pressure <130 mm/Hg <sup>1,2</sup>                                                                                                                             |
| LDL cholesterol                      | LDL-C <70 mg/dl (1.8 mmol/L) <sup>1</sup>                                                                                                                                     |
| Body Mass Index (kg/m <sup>2</sup> ) | Initial BMI      Weight Loss Goal<br>25-27.5          BMI <25<br>>27.5            10% relative weight loss                                                                    |
| Diabetes                             | <8%. <sup>3</sup> A more stringent HbA1c goal (such as <7%) may be appropriate for selected individuals. <sup>4</sup>                                                         |
| <b>Pharmacological agents</b>        |                                                                                                                                                                               |
| <b>Indications</b>                   |                                                                                                                                                                               |
| Aspirin                              | All participants, 75-162 mg daily <sup>1</sup>                                                                                                                                |
| Statin                               | All participants, maximum tolerated dose of high-intensity statin (atorvastatin 40-80 mg or rosuvastatin 20-40 mg) <sup>1</sup>                                               |
| ACEi/ARB                             | Use for hypertension, diabetes, eGFR <60 or LVEF <40% <sup>1</sup>                                                                                                            |
| Beta blocker                         | Use for history of MI or LVEF <40% <sup>1</sup>                                                                                                                               |
| P2Y12 receptor antagonist            | Use for participants with contraindication to aspirin; In combination with aspirin for participants who receive PCI (duration depends on BMS vs. DES); post-MI/ACS for 1 year |
| Ezetimibe                            | Use for participants unable to reach LDL-C goal on maximally tolerated statin dose in countries without access to evolocumab provided to trial participants                   |
| Evolocumab                           | Use for participants unable to reach LDL-C goal on maximally tolerated statin dose in countries with access to evolocumab provided to trial participants                      |

BMI denotes body mass index; HbA1c denotes hemoglobin A1c; MI denotes myocardial infarction; ACEi/ARB denotes angiotensin converting enzyme inhibitor/angiotensin receptor blocker; eGFR denotes estimated glomerular filtration rate; LVEF denotes left ventricular ejection fraction; MI denotes myocardial infarction; PCI denotes percutaneous coronary intervention; BMS denotes bare metal stent; DES denotes drug-eluting stent; ACS denotes acute coronary syndrome; LDL-C denotes low-density lipoprotein cholesterol.

<sup>1</sup> This risk factor goal is included in the trial's definition of guideline-based medical therapy.

<sup>2</sup> This risk factor goal changed from <140 mmHg to <130 mmHg in April 2018.

<sup>3</sup> Appropriate for participants with a history of severe hypoglycemia, advanced microvascular or macrovascular complications, extensive comorbid conditions, and those with longstanding diabetes in whom a goal of <7% is difficult to attain.

<sup>4</sup> May be appropriate for participants with a short duration of diabetes and a long life expectancy if this can be achieved without significant hypoglycemia or other adverse effects of treatment.

*Reprinted from American Heart Journal, 2018;201:124-135, ISCHEMIA Trial Research Group, Maron DJ, Hochman JS, O'Brien SM, Reynolds HR, Boden WE, Stone GW, Bangalore S, Spertus JA, Mark DB, Alexander KP, Shaw L, Berger JS, Ferguson TB Jr, William DO, Harrington RA, Rosenberg Y, International Study of Comparative Health Effectiveness with Medical and Invasive Approaches (ISCHEMIA) trial: Rationale and Design, 2018, with permission from Elsevier*

Table S4. Industry Support

| MEDICATIONS AND DEVICES PROVIDED BY INDUSTRY |                                                                                       |                                                                                                                                                                                                                                                                            |
|----------------------------------------------|---------------------------------------------------------------------------------------|----------------------------------------------------------------------------------------------------------------------------------------------------------------------------------------------------------------------------------------------------------------------------|
| Company Name                                 | Product                                                                               | Country                                                                                                                                                                                                                                                                    |
| Abbott, Abbott Vascular                      | XIENCE Everolimus Eluting Coronary Stent System                                       | ALL                                                                                                                                                                                                                                                                        |
| Abbott<br>(previously St. Jude Medical)      | PressureWire™ Certus and PressureWire™ Aeris; RadiAnalyzer™ Xpress Measurement System | Argentina; Australia; Austria; Belgium; Brazil; Canada; China; Egypt; France; Hungary; India; Israel; Lithuania; Malaysia; Netherlands; New Zealand; Poland; Russia; Saudi Arabia; Serbia; Singapore; South Africa; Spain; Taiwan; Thailand; UK; United Arab Emirates; USA |
| Amgen                                        | Repatha® (evolocumab)                                                                 | Canada; Germany; Spain; USA                                                                                                                                                                                                                                                |
| Arbor Pharmaceuticals                        | Nitrolingual® Pumpspray (nitroglycerin lingual spray)                                 | Canada ( <i>distributor Pohl Boskamp</i> ); USA                                                                                                                                                                                                                            |
|                                              | Edarbi® (azilsartan medoxomil)                                                        | USA                                                                                                                                                                                                                                                                        |
|                                              | Edarbyclor® (azilsartan medoxomil/chlorthalidone)                                     | USA                                                                                                                                                                                                                                                                        |
| AstraZeneca                                  | Crestor® (rosuvastatin calcium)<br>Brilinta® (ticagrelor)                             | Brazil; Canada; China; Mexico; Singapore; USA                                                                                                                                                                                                                              |
| Espero Pharmaceuticals                       | GoNitro™ (nitroglycerin) sublingual powder                                            | USA                                                                                                                                                                                                                                                                        |
| Medtronic                                    | Resolute Integrity DES                                                                | ALL                                                                                                                                                                                                                                                                        |
| Merck & Co.                                  | Zetia® (ezetimibe)<br>Vytorin® (ezetimibe and simvastatin)                            | Argentina; Brazil; USA                                                                                                                                                                                                                                                     |
| Omron                                        | Pedometers                                                                            | ALL                                                                                                                                                                                                                                                                        |
| Philips<br>(previously Volcano Corporation)  | Prime Wire Prestige PLUS Imaging Consoles                                             | Austria, Belgium, Canada, France, Germany, Italy, Japan, Netherlands, Poland, Portugal, South Africa, Spain, Sweden, UK, USA                                                                                                                                               |
| Sunovion Pharmaceuticals                     | Niaspan® (extended-release niacin)                                                    | Canada                                                                                                                                                                                                                                                                     |

Reprinted from American Heart Journal, 2018;201:124-135, ISCHEMIA Trial Research Group, Maron DJ, Hochman JS, O'Brien SM, Reynolds HR, Boden WE, Stone GW, Bangalore S, Spertus JA, Mark DB, Alexander KP, Shaw L, Berger JS, Ferguson TB Jr, William DO, Harrington RA, Rosenberg Y, International Study of Comparative Health Effectiveness with Medical and Invasive Approaches (ISCHEMIA) trial: Rationale and Design, 2018, with permission from Elsevier

Table S5. Baseline Stress Test and Coronary CT Angiography Results

|                                                                    | Total<br>(N=5179) | INV<br>(N=2588)   | CON<br>(N=2591)   |
|--------------------------------------------------------------------|-------------------|-------------------|-------------------|
| Stress test modality                                               |                   |                   |                   |
| Stress imaging                                                     | 75.5% (3909/5179) | 75.3% (1949/2588) | 75.6% (1960/2591) |
| Severe                                                             | 44.8% (1746/3901) | 43.6% (848/1947)  | 46.0% (898/1954)  |
| Moderate                                                           | 41.0% (1601/3901) | 42.0% (818/1947)  | 40.1% (783/1954)  |
| Mild                                                               | 8.2% (318/3901)   | 8.4% (163/1947)   | 7.9% (155/1954)   |
| None                                                               | 5.8% (226/3901)   | 5.8% (112/1947)   | 5.8% (114/1954)   |
| Uninterpretable                                                    | 0.3% (10/3901)    | 0.3% (6/1947)     | 0.2% (4/1954)     |
| Exercise stress test                                               | 24.5% (1270/5179) | 24.7% (639/2588)  | 24.4% (631/2591)  |
| Severe                                                             | 83.0% (1051/1266) | 83.8% (534/637)   | 82.2% (517/629)   |
| Moderate                                                           | 8.0% (101/1266)   | 8.6% (55/637)     | 7.3% (46/629)     |
| Mild                                                               | 2.7% (34/1266)    | 2.0% (13/637)     | 3.3% (21/629)     |
| None                                                               | 2.2% (28/1266)    | 1.9% (12/637)     | 2.5% (16/629)     |
| Uninterpretable                                                    | 4.1% (52/1266)    | 3.6% (23/637)     | 4.6% (29/629)     |
| Coronary anatomy by CCTA                                           |                   |                   |                   |
| Vessels ≥ 50% stenosis by CCTA <sup>1</sup>                        |                   |                   |                   |
| 0                                                                  | 0.1% (4/2986)     | 0.1% (2/1490)     | 0.1% (2/1496)     |
| 1                                                                  | 23.3% (697/2986)  | 24.2% (360/1490)  | 22.5% (337/1496)  |
| 2                                                                  | 31.4% (938/2986)  | 29.1% (434/1490)  | 33.7% (504/1496)  |
| 3                                                                  | 45.1% (1347/2986) | 46.6% (694/1490)  | 43.6% (653/1496)  |
| Specific native vessels with ≥ 50% stenosis by CCTA <sup>1,2</sup> |                   |                   |                   |
| Left main                                                          | 1.0% (40/3845)    | 1.1% (21/1926)    | 1.0% (19/1919)    |
| Left anterior descending                                           | 86.8% (3190/3677) | 86.6% (1591/1837) | 86.9% (1599/1840) |
| Proximal left anterior descending                                  | 46.8% (1749/3739) | 46.3% (865/1870)  | 47.3% (884/1869)  |
| Left circumflex                                                    | 67.4% (2354/3495) | 67.7% (1184/1749) | 67.0% (1170/1746) |
| Right coronary artery                                              | 68.8% (2311/3359) | 70.0% (1178/1684) | 67.6% (1133/1675) |

<sup>1</sup>Includes study (N=3765) and nonstudy (N=148) CCTAs. Randomized participants with any study or nonstudy CCTA: 3913. These numbers represent 50% stenosis criteria for all stress test modalities.

<sup>2</sup>Includes participants with a prior coronary artery bypass graft surgery. CCTA denotes coronary computed tomography angiography.

Table S6. Baseline and On-Trial Physiologic Measurements, Risk Factors, and Medications by Treatment Group

| Variables                      | Baseline          | Last Visit        | Baseline          |                   | Last Visit        |                   |
|--------------------------------|-------------------|-------------------|-------------------|-------------------|-------------------|-------------------|
|                                | Total<br>(N=5179) | Total<br>(N=5179) | INV<br>(N=2588)   | CON<br>(N=2591)   | INV<br>(N=2588)   | CON<br>(N=2591)   |
| Systolic blood pressure        |                   |                   |                   |                   |                   |                   |
| N                              | 5150              | 4962              | 2572              | 2578              | 2463              | 2499              |
| Median                         | 130.0             | 129.0             | 130.0             | 130.0             | 129.0             | 128.0             |
| (Q1, Q3)                       | (120.0, 142.0)    | (120.0, 138.0)    | (120.0, 142.0)    | (120.0, 142.0)    | (120.0, 138.0)    | (120.0, 138.0)    |
| Diastolic blood pressure       |                   |                   |                   |                   |                   |                   |
| N                              | 5150              | 4962              | 2572              | 2578              | 2463              | 2499              |
| Median                         | 77.0              | 74.0              | 77.0              | 77.0              | 74.0              | 74.0              |
| (Q1, Q3)                       | (70.0, 81.0)      | (69.0, 80.0)      | (70.0, 81.0)      | (70.0, 81.0)      | (69.0, 80.0)      | (68.0, 80.0)      |
| Total cholesterol (mg/dL)      |                   |                   |                   |                   |                   |                   |
| N                              | 5074              | 4892              | 2522              | 2552              | 2422              | 2470              |
| Median                         | 154.3             | 131.0             | 154.7             | 154.0             | 130.7             | 131.0             |
| (Q1, Q3)                       | (129.2, 185.6)    | (114.0, 154.0)    | (130.0, 186.0)    | (129.0, 185.6)    | (113.3, 153.0)    | (114.0, 154.7)    |
| HDL cholesterol (mg/dL)        |                   |                   |                   |                   |                   |                   |
| N                              | 5023              | 4888              | 2503              | 2520              | 2420              | 2468              |
| Median                         | 42.5              | 43.0              | 42.5              | 42.5              | 43.0              | 42.9              |
| (Q1, Q3)                       | (36.0, 50.7)      | (36.0, 52.0)      | (36.0, 51.0)      | (36.0, 50.3)      | (36.0, 52.0)      | (36.0, 51.4)      |
| LDL cholesterol (mg/dL)        |                   |                   |                   |                   |                   |                   |
| N                              | 4940              | 4883              | 2464              | 2476              | 2416              | 2467              |
| Median                         | 83.0              | 64.0              | 83.0              | 83.0              | 64.0              | 64.0              |
| (Q1, Q3)                       | (63.0, 111.0)     | (51.0, 81.2)      | (63.0, 111.0)     | (63.0, 109.5)     | (51.0, 81.2)      | (51.0, 81.6)      |
| Triglycerides (mg/dL)          |                   |                   |                   |                   |                   |                   |
| N                              | 4984              | 4885              | 2482              | 2502              | 2418              | 2467              |
| Median                         | 124.0             | 111.5             | 124.0             | 124.0             | 110.0             | 113.0             |
| (Q1, Q3)                       | (91.2, 177.0)     | (82.0, 153.0)     | (91.0, 178.0)     | (92.0, 175.0)     | (82.0, 152.0)     | (81.4, 155.0)     |
| HbA1c (%)                      |                   |                   |                   |                   |                   |                   |
| N                              | 3439              | 3789              | 1716              | 1723              | 1869              | 1920              |
| Median                         | 6.3               | 6.3               | 6.3               | 6.3               | 6.3               | 6.3               |
| (Q1, Q3)                       | (5.8, 7.4)        | (5.8, 7.3)        | (5.8, 7.5)        | (5.8, 7.4)        | (5.8, 7.4)        | (5.8, 7.2)        |
| Body mass index                |                   |                   |                   |                   |                   |                   |
| N                              | 5124              | 4895              | 2564              | 2560              | 2428              | 2467              |
| Median                         | 27.7              | 27.5              | 27.7              | 27.7              | 27.7              | 27.5              |
| (Q1, Q3)                       | (25.0, 31.3)      | (24.7, 31.1)      | (25.0, 31.2)      | (24.9, 31.6)      | (24.7, 30.9)      | (24.7, 31.2)      |
| Current smoking                | 12.4% (640/5174)  | 9.7% (467/4829)   | 12.3% (319/2587)  | 12.4% (321/2587)  | 9.6% (230/2402)   | 9.8% (237/2427)   |
| Medications                    |                   |                   |                   |                   |                   |                   |
| Aspirin or aspirin alternative | 96.1% (4872/5068) | 96.9% (4663/4814) | 96.6% (2443/2530) | 95.7% (2429/2538) | 96.9% (2316/2390) | 96.8% (2347/2424) |
| Clopidogrel                    | 26.0% (1345/5175) | 27.0% (1348/4997) | 28.2% (730/2586)  | 23.8% (615/2589)  | 30.0% (744/2483)  | 24.0% (604/2514)  |
| Anticoagulant                  | 4.0% (203/5131)   | 6.9% (342/4992)   | 4.4% (114/2567)   | 3.5% (89/2564)    | 7.3% (182/2482)   | 6.4% (160/2510)   |

| Variables                            | Baseline          | Last Visit        | Baseline          |                   | Last Visit        |                   |
|--------------------------------------|-------------------|-------------------|-------------------|-------------------|-------------------|-------------------|
|                                      | Total             | Total             | INV               | CON               | INV               | CON               |
|                                      | (N=5179)          | (N=5179)          | (N=2588)          | (N=2591)          | (N=2588)          | (N=2591)          |
| Antiplatelet or anticoagulant        | 100% (4978/4978)  | 100% (4845/4845)  | 100% (2499/2499)  | 100% (2479/2479)  | 100% (2409/2409)  | 100% (2436/2436)  |
| Statin                               | 94.8% (4904/5174) | 95.2% (4755/4997) | 94.4% (2441/2586) | 95.2% (2463/2588) | 95.0% (2361/2484) | 95.3% (2394/2513) |
| High-intensity statin                | 40.9% (1911/4670) | 66.0% (3223/4881) | 40.1% (933/2328)  | 41.8% (978/2342)  | 66.3% (1604/2421) | 65.8% (1619/2460) |
| Ezetimibe                            | 4.1% (212/5175)   | 24.4% (1222/4998) | 4.1% (105/2586)   | 4.1% (107/2589)   | 24.2% (602/2484)  | 24.7% (620/2514)  |
| Ace inhibitor / ARB                  | 66.0% (3416/5175) | 69.4% (3469/4996) | 65.2% (1685/2586) | 66.9% (1731/2589) | 69.2% (1718/2483) | 69.7% (1751/2513) |
| Adherent to Medications <sup>1</sup> | 73.9% (3672/4967) | 81.5% (3991/4896) | 73.7% (1823/2473) | 74.1% (1849/2494) | 82.7% (2012/2434) | 80.4% (1979/2462) |

<sup>1</sup>As assessed by Morisky-Greene-Levine medication adherence scale. (Morisky DE, Green LW, Levine DM. Concurrent and predictive validity of a self-reported measure of medication adherence. Medical Care 1986;24:67-74). A summary binary variable was created by coding those who responded strongly agree, agree, don't know, or refuse to any of the 4 questions in the survey as nonadherent; otherwise, patients were coded as adherent.

Aspirin alternative denotes P2Y12 inhibitor.

Antiplatelet denotes aspirin or P2Y12 inhibitor.

Table S7a. Frequency and Timing of the First Catheterization and Revascularization for Participants Randomized to the INV Treatment<sup>1</sup>  
Intent-to-Treat Population

|                                                                                   | Statistic          | INV<br>(N=2588)   |
|-----------------------------------------------------------------------------------|--------------------|-------------------|
| First Catheterization <sup>2</sup> or Revascularization Done                      | % (n / N)          | 95.6% (2475/2588) |
| First Catheterization or Revascularization Done Within 6 Weeks of Randomization   | % (n / N)          | 80.3% (2079/2588) |
| First Catheterization or Revascularization Done Within 3 Months of Randomization  | % (n / N)          | 92.1% (2383/2588) |
| First Catheterization or Revascularization Done Within 12 Months of Randomization | % (n / N)          | 94.9% (2457/2588) |
| First Catheterization or Revascularization Done by the Time of the 6-week Visit   | % (n / N)          | 87.2% (2257/2588) |
| Days From Randomization to First Catheterization or Revascularization             | n                  | 2475              |
|                                                                                   | Mean (Stand. Dev.) | 31.8 (73.9)       |
|                                                                                   | Median (Q1, Q3)    | 19 (10, 32)       |
|                                                                                   | Min, Max           | 1, 1623           |
| First Revascularization Done                                                      | % (n / N)          | 79.4% (2054/2588) |
| First Revascularization Done Within 6 Weeks of Randomization                      | % (n / N)          | 54.9% (1420/2588) |
| First Revascularization Done Within 3 Months of Randomization                     | % (n / N)          | 69.3% (1794/2588) |
| First Revascularization Done Within 12 Months of Randomization                    | % (n / N)          | 78.1% (2021/2588) |
| First Revascularization Done by the Time of the 6-week Visit                      | % (n / N)          | 63.3% (1639/2588) |
| Days From Randomization to First Revascularization                                | n                  | 2054              |
|                                                                                   | Mean (Stand. Dev.) | 54.4 (127.8)      |
|                                                                                   | Median (Q1, Q3)    | 27 (14, 51)       |
|                                                                                   | Min, Max           | 1, 2144           |

1 The purpose of this table is to summarize participants' level of adherence to the INV strategy as measured by the completion and timeliness of a post-randomization catheterization and/or revascularization procedure.

2 The first catheterization is done within 6 weeks of randomization if the date of the first catheterization is prior to the date that is exactly 6 weeks after randomization. The first catheterization is done by the time of the 6-week visit if the date of the first catheterization is prior to the date of the visit that is indicated as being the 6-week follow-up visit. The 6-week follow up visit may not occur exactly 6 weeks after randomization as the visit can happen at any time between randomization and 2 months after randomization.

23 invasive strategy participants had a primary outcome event prior to their first catheterization.

42 invasive strategy participants had a primary outcome event prior to their first revascularization.

When counting catheterizations performed prior to randomization that were not repeated prior to CABG in INV participants, a total of 2475/2588 (96%) of INV participants had catheterization or revascularization for any reason, consistent with protocol adherence. The proportions of participants undergoing angiography and revascularization differ from the cumulative incidence function rates which account for censoring.

Table S7b. Unadjusted Cumulative Incidence Function Estimates (Accounting for Competing Risk of Death) of First Cardiac Catheterization for Conservative Strategy Participants by Indications for the Procedure

|                                                                        | Any Reason | Suspected but Not Confirmed Event (MIUA, HF, RCA) | Confirmed Event (MIUA, HF, RCA) | OMT Failure / Refractory Angina | Non-adherence / Other |
|------------------------------------------------------------------------|------------|---------------------------------------------------|---------------------------------|---------------------------------|-----------------------|
| First Catheterization                                                  | 667        | 177                                               | 180                             | 100                             | 210                   |
| ≤ 30 days                                                              | 1.9%       | 0.5%                                              | 0.5%                            | 0.2%                            | 0.7%                  |
| ≤ 45 days                                                              | 2.4%       | 0.7%                                              | 0.6%                            | 0.2%                            | 0.9%                  |
| ≤ 60 days                                                              | 3.6%       | 1.0%                                              | 0.9%                            | 0.6%                            | 1.1%                  |
| ≤ 90 days                                                              | 5.8%       | 1.2%                                              | 1.7%                            | 1.2%                            | 1.7%                  |
| ≤ 180 days                                                             | 8.7%       | 2.1%                                              | 2.5%                            | 1.6%                            | 2.6%                  |
| ≤ 1 year                                                               | 13.8%      | 3.8%                                              | 3.5%                            | 2.6%                            | 4.0%                  |
| ≤ 2 years                                                              | 20.6%      | 5.8%                                              | 5.3%                            | 3.5%                            | 6.0%                  |
| ≤ 3 years                                                              | 24.8%      | 6.7%                                              | 6.9%                            | 3.8%                            | 7.3%                  |
| ≤ 4 years                                                              | 28.1%      | 7.4%                                              | 7.8%                            | 4.1%                            | 8.7%                  |
| ≤ 5 years                                                              | 32.5%      | 8.4%                                              | 8.8%                            | 4.4%                            | 11.0%                 |
| First Catheterization Not Preceded by Confirmed Primary Endpoint Event | 487        | 177                                               | 0                               | 100                             | 210                   |
| ≤ 30 days                                                              | 1.4%       | 0.5%                                              |                                 | 0.2%                            | 0.7%                  |
| ≤ 45 days                                                              | 1.7%       | 0.7%                                              |                                 | 0.2%                            | 0.9%                  |
| ≤ 60 days                                                              | 2.7%       | 1.0%                                              |                                 | 0.6%                            | 1.1%                  |
| ≤ 90 days                                                              | 4.1%       | 1.2%                                              |                                 | 1.2%                            | 1.7%                  |
| ≤ 180 days                                                             | 6.2%       | 2.1%                                              |                                 | 1.6%                            | 2.6%                  |
| ≤ 1 year                                                               | 10.3%      | 3.8%                                              |                                 | 2.6%                            | 4.0%                  |
| ≤ 2 years                                                              | 15.3%      | 5.8%                                              |                                 | 3.5%                            | 6.0%                  |
| ≤ 3 years                                                              | 17.9%      | 6.7%                                              |                                 | 3.8%                            | 7.3%                  |
| ≤ 4 years                                                              | 20.3%      | 7.4%                                              |                                 | 4.1%                            | 8.7%                  |
| ≤ 5 years                                                              | 23.7%      | 8.4%                                              |                                 | 4.4%                            | 10.9%                 |

The proportions of participants undergoing angiography and revascularization differ from the cumulative incidence function rates which account for censoring.



Table S7c. Unadjusted Cumulative Incidence Function Estimates (Accounting for Competing Risk of Death) of First Revascularization for Conservative Strategy Participants by Indications for the Procedure

|                                                                          | Any Reason | Suspected but Not Confirmed Event (MIUA, HF, RCA) | Confirmed Event (MIUA, HF, RCA) | OMT Failure / Refractory Angina | Non-adherence / Other |
|--------------------------------------------------------------------------|------------|---------------------------------------------------|---------------------------------|---------------------------------|-----------------------|
| First Revascularization                                                  | 544        | 151                                               | 162                             | 47                              | 184                   |
| ≤ 30 days                                                                | 1.4%       | 0.3%                                              | 0.4%                            | 0.2%                            | 0.6%                  |
| ≤ 45 days                                                                | 2.2%       | 0.5%                                              | 0.6%                            | 0.2%                            | 0.8%                  |
| ≤ 60 days                                                                | 3.0%       | 0.7%                                              | 0.9%                            | 0.3%                            | 1.1%                  |
| ≤ 90 days                                                                | 4.7%       | 1.1%                                              | 1.4%                            | 0.6%                            | 1.6%                  |
| ≤ 180 days                                                               | 7.3%       | 1.8%                                              | 2.1%                            | 0.8%                            | 2.7%                  |
| ≤ 1 year                                                                 | 11.6%      | 3.1%                                              | 3.0%                            | 1.3%                            | 4.1%                  |
| ≤ 2 years                                                                | 17.0%      | 4.7%                                              | 4.8%                            | 1.6%                            | 5.9%                  |
| ≤ 3 years                                                                | 20.1%      | 5.7%                                              | 6.1%                            | 1.6%                            | 6.7%                  |
| ≤ 4 years                                                                | 23.1%      | 6.5%                                              | 7.0%                            | 1.9%                            | 7.7%                  |
| ≤ 5 years                                                                | 26.2%      | 7.3%                                              | 7.9%                            | 2.4%                            | 8.7%                  |
| First Revascularization Not Preceded by Confirmed Primary Endpoint Event | 382        | 151                                               | 0                               | 47                              | 184                   |
| ≤ 30 days                                                                | 1.0%       | 0.3%                                              |                                 | 0.2%                            | 0.6%                  |
| ≤ 45 days                                                                | 1.6%       | 0.5%                                              |                                 | 0.2%                            | 0.8%                  |
| ≤ 60 days                                                                | 2.2%       | 0.7%                                              |                                 | 0.3%                            | 1.1%                  |
| ≤ 90 days                                                                | 3.3%       | 1.1%                                              |                                 | 0.6%                            | 1.6%                  |
| ≤ 180 days                                                               | 5.2%       | 1.8%                                              |                                 | 0.8%                            | 2.7%                  |
| ≤ 1 year                                                                 | 8.5%       | 3.1%                                              |                                 | 1.3%                            | 4.1%                  |
| ≤ 2 years                                                                | 12.2%      | 4.7%                                              |                                 | 1.6%                            | 5.9%                  |
| ≤ 3 years                                                                | 14.0%      | 5.7%                                              |                                 | 1.6%                            | 6.7%                  |
| ≤ 4 years                                                                | 16.1%      | 6.5%                                              |                                 | 1.9%                            | 7.7%                  |
| ≤ 5 years                                                                | 18.3%      | 7.2%                                              |                                 | 2.4%                            | 8.7%                  |

The proportions of participants undergoing angiography and revascularization differ from the cumulative incidence function rates which account for censoring.

**Table S8. Angiographic Characteristics and Procedural Data for First Procedure**

| <b>Parameter</b>                                                                                                                                     | <b>Invasive Strategy Participants (N=2588)</b> |
|------------------------------------------------------------------------------------------------------------------------------------------------------|------------------------------------------------|
| <b>Angiographic Characteristics</b>                                                                                                                  |                                                |
| Number of Native Vessels With $\geq 50\%$ Stenosis (QCA)                                                                                             |                                                |
| 0                                                                                                                                                    | 6.4% (151/2371)                                |
| 1                                                                                                                                                    | 22.3% (529/2371)                               |
| 2                                                                                                                                                    | 31.7% (751/2371)                               |
| 3                                                                                                                                                    | 39.6% (940/2371)                               |
| Native Vessels With $\geq 50\%$ Stenosis (QCA)                                                                                                       |                                                |
| Left Main                                                                                                                                            | 3.8% (95/2473)                                 |
| Left Anterior Descending (LAD)                                                                                                                       | 76.5% (1859/2430)                              |
| Proximal LAD                                                                                                                                         | 36.2% (895/2473)                               |
| Left Circumflex                                                                                                                                      | 62.0% (1512/2440)                              |
| Right Coronary Artery                                                                                                                                | 63.7% (1536/2410)                              |
| FFR use                                                                                                                                              | 20.3% (481/2372)                               |
| <b>Revascularization Characteristics</b>                                                                                                             |                                                |
| Mode of Revascularization                                                                                                                            |                                                |
| PCI                                                                                                                                                  | 74.2% (1524/2054)                              |
| Stent use                                                                                                                                            | 93.0% (1418/1524)                              |
| DES use                                                                                                                                              | 97.9% (1357/1386)                              |
| 1 <sup>st</sup> generation                                                                                                                           | 1.9% (26/1355)                                 |
| 2 <sup>nd</sup> generation                                                                                                                           | 98.1% (1329/1355)                              |
| Stent not deliverable                                                                                                                                | 5.4% (83/1524)                                 |
| Balloon angioplasty only                                                                                                                             | 1.5% (23/1524)                                 |
| CABG                                                                                                                                                 | 25.8% (530/2054)                               |
| Internal mammary artery use                                                                                                                          | 91.9% (486/529)                                |
| Intended Management Strategy After First Diagnostic Catheterization in Participants with a Catheterization But No Revascularization During Follow-up | 421                                            |
| Medical Therapy Only                                                                                                                                 | 88.1% (371/421)                                |
| No Obstructive Coronary Artery Disease                                                                                                               | 52.5% (221/421)                                |
| Anatomy Not Suitable for Any Mode of Revascularization                                                                                               | 26.4% (111/421)                                |
| Patient Preference                                                                                                                                   | 6.7% (28/421)                                  |
| Other                                                                                                                                                | 2.6% (11/421)                                  |
| Intent to Perform PCI / CABG / Hybrid                                                                                                                | 11.6% (49/421)                                 |
| Undecided                                                                                                                                            | 0.0% (0/421)                                   |
| Unknown                                                                                                                                              | 0.2% (1/421)                                   |

Diameter stenosis  $\geq 50\%$  by quantitative coronary angiography (among 2474 angiograms received in the core laboratory). Most participating centers had FFR capabilities at the time of their first participant enrollment. Sites without this capability were provided a loaner console from St. Jude Medical, Inc. or Volcano Corp. and were trained to use FFR prior to participant enrollment. The decision to perform FFR was based on visual estimation of stenosis.

QCA denotes quantitative coronary angiography

LAD denotes left anterior descending

SYNTAX Score denotes a scoring system derived from the Synergy between PCI with Taxus and Cardiac Surgery (SYNTAX) trial

FFR denotes fractional flow reserve

PCI denotes percutaneous coronary intervention

CABG denotes coronary artery bypass graft surgery

Table S9. Total Number of Catheterization and Revascularization Procedures by Treatment Group

|                                                  | <b>All Subjects<br/>(N=5179)</b> | <b>INV<br/>(N=2588)</b> | <b>CON<br/>(N=2591)</b> |
|--------------------------------------------------|----------------------------------|-------------------------|-------------------------|
| Total Number of Invasive Coronary Angiograms     | 3718                             | 2887                    | 831                     |
| Average Per Participant                          | 0.7                              | 1.1                     | 0.3                     |
| Total Number of Revascularizations (PCI or CABG) | 3125                             | 2450                    | 675                     |
| Average Per Participant                          | 0.6                              | 0.9                     | 0.3                     |
| Total Number of PCI Procedures <sup>1</sup>      | 2350                             | 1873                    | 477                     |
| Total Number of CABG Procedures                  | 775                              | 577                     | 198                     |
| Total Number of Catheterization Lab Visits       | 4352                             | 3397                    | 955                     |
| Average Per Participant                          | 0.8                              | 1.3                     | 0.4                     |

<sup>1</sup> A PCI procedure may include more than one treated vessel in the same Catheterization Lab visit.

**Table S10. Outcomes by Treatment Group Using the Primary Definition of MI**

**Estimated Cumulative Event Rates and Differences**

| <b>Cardiovascular Death</b>                             | <b>INV<br/>(N=2588)</b> | <b>CON<br/>(N=2591)</b> | <b>Estimated Difference (95% CI)</b>  |
|---------------------------------------------------------|-------------------------|-------------------------|---------------------------------------|
| Patients with events                                    | 92                      | 111                     |                                       |
| 6-month cumulative event rate                           | 0.7%                    | 0.4%                    | 0.3% (-0.1% to 0.7%)                  |
| 1-year cumulative event rate                            | 1.3%                    | 1.0%                    | 0.4% (-0.2% to 0.9%)                  |
| 2-year cumulative event rate                            | 2.2%                    | 2.4%                    | -0.3% (-1.1% to 0.6%)                 |
| 3-year cumulative event rate                            | 2.8%                    | 3.5%                    | -0.6% (-1.7% to 0.4%)                 |
| 4-year cumulative event rate                            | 4.1%                    | 5.0%                    | -1.0% (-2.3% to 0.4%)                 |
| 5-year cumulative event rate                            | 5.2%                    | 6.5%                    | -1.3% (-3.1% to 0.6%)                 |
| Restricted mean event-free time <sup>1</sup>            | 4.87 years              | 4.85 years              | 7.4 days (-7.2 days to 21.9 days)     |
| Cox model HR <sup>2</sup> : 0.87 (95% CI: 0.66 to 1.15) |                         |                         |                                       |
| <b>Procedural MI</b>                                    | <b>INV</b>              | <b>CON</b>              | <b>Estimated Difference (95% CI)</b>  |
| Patients with events                                    | 70                      | 24                      |                                       |
| 6-month cumulative event rate                           | 2.6%                    | 0.3%                    | 2.3% (1.6% to 2.9%)                   |
| 1-year cumulative event rate                            | 2.6%                    | 0.5%                    | 2.2% (1.5% to 2.9%)                   |
| 2-year cumulative event rate                            | 2.7%                    | 0.8%                    | 1.9% (1.2% to 2.6%)                   |
| 3-year cumulative event rate                            | 2.7%                    | 1.0%                    | 1.7% (0.9% to 2.4%)                   |
| 4-year cumulative event rate                            | 2.7%                    | 1.1%                    | 1.6% (0.8% to 2.4%)                   |
| 5-year cumulative event rate                            | 2.8%                    | 1.1%                    | 1.7% (0.9% to 2.5%)                   |
| Restricted mean event-free time                         | 4.87 years              | 4.96 years              | -33.6 days (-46.0 days to -21.2 days) |
| <b>Non-procedural MI<sup>3</sup></b>                    | <b>INV</b>              | <b>CON</b>              | <b>Estimated Difference (95% CI)</b>  |
| Patients with events                                    | 130                     | 196                     |                                       |
| 6-month cumulative event rate                           | 1.8%                    | 2.3%                    | -0.5% (-1.2% to 0.3%)                 |
| 1-year cumulative event rate                            | 2.7%                    | 3.3%                    | -0.6% (-1.5% to 0.4%)                 |
| 2-year cumulative event rate                            | 3.5%                    | 5.4%                    | -1.9% (-3.0% to -0.8%)                |
| 3-year cumulative event rate                            | 4.6%                    | 7.1%                    | -2.5% (-3.9% to -1.1%)                |
| 4-year cumulative event rate                            | 5.9%                    | 8.7%                    | -2.8% (-4.5% to -1.1%)                |
| 5-year cumulative event rate                            | 7.1%                    | 10.0%                   | -2.9% (-5.0% to -0.8%)                |
| Restricted mean event-free time                         | 4.79 years              | 4.70 years              | 34.6 days (14.6 days to 54.6 days)    |
| <b>Hospitalization for Unstable Angina</b>              | <b>INV</b>              | <b>CON</b>              | <b>Estimated Difference (95% CI)</b>  |
| Patients with events                                    | 16                      | 32                      |                                       |
| 6-month cumulative event rate                           | 0.4%                    | 0.3%                    | 0.0% (-0.3% to 0.3%)                  |
| 1-year cumulative event rate                            | 0.5%                    | 0.6%                    | -0.1% (-0.5% to 0.3%)                 |
| 2-year cumulative event rate                            | 0.5%                    | 1.0%                    | -0.4% (-0.9% to 0.1%)                 |
| 3-year cumulative event rate                            | 0.5%                    | 1.2%                    | -0.6% (-1.2% to -0.1%)                |
| 4-year cumulative event rate                            | 0.6%                    | 1.4%                    | -0.8% (-1.4% to -0.2%)                |
| 5-year cumulative event rate                            | 0.8%                    | 1.6%                    | -0.8% (-1.6% to -0.1%)                |
| Restricted mean event-free time                         | 4.97 years              | 4.95 years              | 8.6 days (0.4 days to 16.7 days)      |
| Cox model HR: 0.50 (95% CI: 0.27 to 0.91)               |                         |                         |                                       |

| <b>Hospitalization for Heart Failure</b>  | <b>INV</b> | <b>CON</b> | <b>Estimated Difference (95% CI)</b> |
|-------------------------------------------|------------|------------|--------------------------------------|
| Patients with events                      | 51         | 25         |                                      |
| 6-month cumulative event rate             | 0.3%       | 0.2%       | 0.2% (-0.1% to 0.4%)                 |
| 1-year cumulative event rate              | 0.5%       | 0.3%       | 0.2% (-0.2% to 0.5%)                 |
| 2-year cumulative event rate              | 1.1%       | 0.5%       | 0.6% (0.1% to 1.1%)                  |
| 3-year cumulative event rate              | 1.7%       | 0.7%       | 1.0% (0.3% to 1.7%)                  |
| 4-year cumulative event rate              | 2.2%       | 0.9%       | 1.3% (0.5% to 2.1%)                  |
| 5-year cumulative event rate              | 2.8%       | 1.6%       | 1.2% (-0.0% to 2.4%)                 |
| Restricted mean event-free time           | 4.93 years | 4.97 years | -13.5 days (-22.5 days to -4.6 days) |
| Cox model HR: 2.23 (95% CI: 1.38 to 3.61) |            |            |                                      |
|                                           |            |            |                                      |
| <b>Resuscitated Cardiac Arrest</b>        | <b>INV</b> | <b>CON</b> | <b>Estimated Difference (95% CI)</b> |
| Patients with events                      | 5          | 5          |                                      |
| 6-month cumulative event rate             | 0.0%       | 0.0%       | -0.0% (-0.1% to 0.1%)                |
| 1-year cumulative event rate              | 0.0%       | 0.1%       | -0.0% (-0.2% to 0.1%)                |
| 2-year cumulative event rate              | 0.1%       | 0.1%       | -0.0% (-0.2% to 0.2%)                |
| 3-year cumulative event rate              | 0.2%       | 0.2%       | -0.0% (-0.3% to 0.3%)                |
| 4-year cumulative event rate              | 0.2%       | 0.2%       | -0.0% (-0.3% to 0.3%)                |
| 5-year cumulative event rate              | 0.2%       | 0.2%       | -0.0% (-0.3% to 0.3%)                |
| Restricted mean event-free time           | 4.99 years | 4.99 years | -0.0 days (-3.6 days to 3.5 days)    |
| Cox model HR: 1.01 (95% CI: 0.29 to 3.49) |            |            |                                      |
|                                           |            |            |                                      |
| <b>Stroke</b>                             | <b>INV</b> | <b>CON</b> | <b>Estimated Difference (95% CI)</b> |
| Patients with events                      | 45         | 38         |                                      |
| 6-month cumulative event rate             | 0.5%       | 0.1%       | 0.4% (0.1% to 0.7%)                  |
| 1-year cumulative event rate              | 0.7%       | 0.4%       | 0.4% (-0.0% to 0.8%)                 |
| 2-year cumulative event rate              | 1.4%       | 0.7%       | 0.7% (0.1% to 1.2%)                  |
| 3-year cumulative event rate              | 1.7%       | 1.2%       | 0.5% (-0.2% to 1.2%)                 |
| 4-year cumulative event rate              | 1.8%       | 1.7%       | 0.1% (-0.7% to 1.0%)                 |
| 5-year cumulative event rate              | 2.3%       | 2.4%       | -0.1% (-1.3% to 1.0%)                |
| Restricted mean event-free time           | 4.93 years | 4.95 years | -6.9 days (-16.8 days to 3.1 days)   |
|                                           |            |            |                                      |
| <b>Primary Endpoint or Stroke</b>         | <b>INV</b> | <b>CON</b> | <b>Estimated Difference (95% CI)</b> |
| Patients with events                      | 346        | 376        |                                      |
| 6-month cumulative event rate             | 5.8%       | 3.5%       | 2.3% (1.1% to 3.4%)                  |
| 1-year cumulative event rate              | 7.6%       | 5.7%       | 1.9% (0.6% to 3.3%)                  |
| 2-year cumulative event rate              | 10.1%      | 9.9%       | 0.2% (-1.5% to 1.8%)                 |
| 3-year cumulative event rate              | 12.5%      | 13.5%      | -1.0% (-3.0% to 1.0%)                |
| 4-year cumulative event rate              | 14.4%      | 16.6%      | -2.2% (-4.5% to 0.1%)                |
| 5-year cumulative event rate              | 17.7%      | 19.8%      | -2.2% (-5.2% to 0.8%)                |
| Restricted mean event-free time           | 4.45 years | 4.44 years | 4.3 days (-23.9 days to 32.5 days)   |
|                                           |            |            |                                      |
| <b>CV death, MI, or Stroke</b>            | <b>INV</b> | <b>CON</b> | <b>Estimated Difference (95% CI)</b> |
| Patients with events                      | 306        | 342        |                                      |
| 6-month cumulative event rate             | 5.3%       | 3.0%       | 2.3% (1.2% to 3.4%)                  |
| 1-year cumulative event rate              | 6.9%       | 4.9%       | 2.0% (0.7% to 3.2%)                  |

|                                 |            |            |                                    |
|---------------------------------|------------|------------|------------------------------------|
| 2-year cumulative event rate    | 9.0%       | 8.7%       | 0.2% (-1.3% to 1.8%)               |
| 3-year cumulative event rate    | 10.9%      | 11.9%      | -1.0% (-2.9% to 0.8%)              |
| 4-year cumulative event rate    | 12.9%      | 15.2%      | -2.3% (-4.5% to -0.1%)             |
| 5-year cumulative event rate    | 15.6%      | 18.3%      | -2.8% (-5.6% to 0.1%)              |
| Restricted mean event-free time | 4.51 years | 4.49 years | 5.7 days (-21.1 days to 32.6 days) |
|                                 |            |            |                                    |

<sup>1</sup>Defined as the per-person average time spent event-free over the time period between randomization and 5 years. This average is close to 5 years because most patients do not experience outcome events in that timeframe.

<sup>2</sup>Hazard ratio for invasive versus conservative according to the Cox proportional hazards model (pre-specified primary analysis). Adjusted for age, sex, estimated glomerular filtration rate, ejection fraction, and diabetes. Hazard ratios are reported for outcomes that appear to satisfy proportional hazards.

<sup>3</sup>Diagnosis of non-procedural MI was defined as Type 1, 2, 4b, or 4c myocardial infarction. See Definitions of Outcomes in Supplementary Methods.

INV denotes invasive strategy; CON denotes conservative strategy; CV denotes cardiovascular; MI denotes myocardial infarction; HR denotes hazard ratio; CI denotes confidence interval

Table S11. Outcomes by Treatment Group Using the Secondary Definition of MI

| <b>Primary Outcome<br/>Using Secondary MI Definition</b>       | <b>INV<br/>(N=2588)</b> | <b>CON<br/>(N=2591)</b> | <b>Estimated Difference (95% CI)</b>    |
|----------------------------------------------------------------|-------------------------|-------------------------|-----------------------------------------|
| Patients with events                                           | 446                     | 369                     |                                         |
| 6-month cumulative event rate                                  | 10.2%                   | 3.7%                    | 6.5% (5.2% to 7.9%)                     |
| 1-year cumulative event rate                                   | 11.9%                   | 5.9%                    | 6.0% (4.5% to 7.6%)                     |
| 2-year cumulative event rate                                   | 14.1%                   | 10.2%                   | 3.9% (2.0% to 5.7%)                     |
| 3-year cumulative event rate                                   | 16.2%                   | 13.3%                   | 2.9% (0.8% to 4.9%)                     |
| 4-year cumulative event rate                                   | 18.3%                   | 16.3%                   | 2.0% (-0.4% to 4.3%)                    |
| 5-year cumulative event rate                                   | 21.2%                   | 19.0%                   | 2.2% (-0.7% to 5.2%)                    |
| Restricted mean event-free time <sup>1</sup>                   | 4.25 years              | 4.44 years              | -68.7 days (-99.4 days to -38.0 days)   |
|                                                                |                         |                         |                                         |
| <b>CV death or MI<br/>Using Secondary MI Definition</b>        | <b>INV</b>              | <b>CON</b>              | <b>Estimated Difference (95% CI)</b>    |
| Patients with events                                           | 406                     | 331                     |                                         |
| 6-month cumulative event rate                                  | 9.7%                    | 3.2%                    | 6.5% (5.2% to 7.9%)                     |
| 1-year cumulative event rate                                   | 11.2%                   | 5.0%                    | 6.1% (4.6% to 7.6%)                     |
| 2-year cumulative event rate                                   | 12.9%                   | 8.9%                    | 4.0% (2.3% to 5.7%)                     |
| 3-year cumulative event rate                                   | 14.7%                   | 11.7%                   | 3.0% (1.1% to 5.0%)                     |
| 4-year cumulative event rate                                   | 16.8%                   | 14.7%                   | 2.1% (-0.2% to 4.4%)                    |
| 5-year cumulative event rate                                   | 19.1%                   | 17.3%                   | 1.9% (-0.9% to 4.7%)                    |
| Restricted mean event-free time                                | 4.31 years              | 4.50 years              | -69.9 days (-99.4 days to -40.4 days)   |
|                                                                |                         |                         |                                         |
| <b>Myocardial Infarction<br/>Using Secondary MI Definition</b> | <b>INV</b>              | <b>CON</b>              | <b>Estimated Difference (95% CI)</b>    |
| Patients with events                                           | 343                     | 250                     |                                         |
| 6-month cumulative event rate                                  | 9.3%                    | 2.8%                    | 6.5% (5.2% to 7.8%)                     |
| 1-year cumulative event rate                                   | 10.3%                   | 4.3%                    | 6.0% (4.6% to 7.5%)                     |
| 2-year cumulative event rate                                   | 11.5%                   | 7.2%                    | 4.3% (2.7% to 5.9%)                     |
| 3-year cumulative event rate                                   | 12.9%                   | 9.1%                    | 3.7% (1.9% to 5.5%)                     |
| 4-year cumulative event rate                                   | 14.2%                   | 10.9%                   | 3.2% (1.2% to 5.3%)                     |
| 5-year cumulative event rate                                   | 15.4%                   | 12.7%                   | 2.7% (0.3% to 5.1%)                     |
| Restricted mean event-free time                                | 4.40 years              | 4.61 years              | -78.0 days (-105.7 days to -50.2 days)  |
|                                                                |                         |                         |                                         |
| <b>Procedural MI<br/>Using Secondary MI Definition</b>         | <b>INV</b>              | <b>CON</b>              | <b>Estimated Difference (95% CI)</b>    |
| Patients with events                                           | 211                     | 44                      |                                         |
| 6-month cumulative event rate                                  | 7.7%                    | 0.6%                    | 7.2% (6.1% to 8.2%)                     |
| 1-year cumulative event rate                                   | 8.0%                    | 0.9%                    | 7.1% (6.0% to 8.2%)                     |
| 2-year cumulative event rate                                   | 8.0%                    | 1.4%                    | 6.6% (5.5% to 7.8%)                     |
| 3-year cumulative event rate                                   | 8.1%                    | 1.7%                    | 6.4% (5.2% to 7.6%)                     |
| 4-year cumulative event rate                                   | 8.2%                    | 2.0%                    | 6.2% (5.0% to 7.4%)                     |
| 5-year cumulative event rate                                   | 8.4%                    | 2.0%                    | 6.4% (5.2% to 7.7%)                     |
| Restricted mean event-free time                                | 4.60 years              | 4.93 years              | -118.6 days (-138.8 days to -98.3 days) |



| <b>Non-procedural MI<sup>2</sup><br/>Using Secondary MI Definition</b> | <b>INV</b> | <b>CON</b> | <b>Estimated Difference (95% CI)</b>   |
|------------------------------------------------------------------------|------------|------------|----------------------------------------|
| Patients with events                                                   | 134        | 200        |                                        |
| 6-month cumulative event rate                                          | 1.9%       | 2.4%       | -0.5% (-1.3% to 0.3%)                  |
| 1-year cumulative event rate                                           | 2.8%       | 3.5%       | -0.7% (-1.6% to 0.3%)                  |
| 2-year cumulative event rate                                           | 3.6%       | 5.6%       | -2.0% (-3.1% to -0.8%)                 |
| 3-year cumulative event rate                                           | 4.8%       | 7.3%       | -2.5% (-3.9% to -1.1%)                 |
| 4-year cumulative event rate                                           | 6.0%       | 8.9%       | -2.8% (-4.5% to -1.1%)                 |
| 5-year cumulative event rate                                           | 7.3%       | 10.2%      | -2.9% (-5.0% to -0.8%)                 |
| Restricted mean event-free time                                        | 4.79 years | 4.69 years | 35.5 days (15.3 days to 55.8 days)     |
|                                                                        |            |            |                                        |
| <b>Primary Outcome or Stroke<br/>Using Secondary MI Definition</b>     | <b>INV</b> | <b>CON</b> | <b>Estimated Difference (95% CI)</b>   |
| Patients with events                                                   | 469        | 393        |                                        |
| 6-month cumulative event rate                                          | 10.6%      | 3.8%       | 6.8% (5.4% to 8.2%)                    |
| 1-year cumulative event rate                                           | 12.5%      | 6.2%       | 6.4% (4.8% to 7.9%)                    |
| 2-year cumulative event rate                                           | 15.0%      | 10.6%      | 4.4% (2.5% to 6.2%)                    |
| 3-year cumulative event rate                                           | 17.1%      | 14.1%      | 3.0% (0.9% to 5.1%)                    |
| 4-year cumulative event rate                                           | 19.2%      | 17.4%      | 1.8% (-0.6% to 4.2%)                   |
| 5-year cumulative event rate                                           | 22.3%      | 20.6%      | 1.7% (-1.4% to 4.7%)                   |
| Restricted mean event-free time                                        | 4.21 years | 4.41 years | -70.9 days (-102.2 days to -39.5 days) |
|                                                                        |            |            |                                        |
| <b>CV Death, MI, or Stroke<br/>Using Secondary MI Definition</b>       | <b>INV</b> | <b>CON</b> | <b>Estimated Difference (95% CI)</b>   |
| Patients with events                                                   | 431        | 359        |                                        |
| 6-month cumulative event rate                                          | 10.1%      | 3.3%       | 6.8% (5.5% to 8.2%)                    |
| 1-year cumulative event rate                                           | 11.7%      | 5.4%       | 6.4% (4.9% to 7.9%)                    |
| 2-year cumulative event rate                                           | 13.9%      | 9.5%       | 4.4% (2.7% to 6.2%)                    |
| 3-year cumulative event rate                                           | 15.7%      | 12.6%      | 3.1% (1.1% to 5.1%)                    |
| 4-year cumulative event rate                                           | 17.7%      | 16.0%      | 1.7% (-0.6% to 4.1%)                   |
| 5-year cumulative event rate                                           | 20.3%      | 19.1%      | 1.2% (-1.7% to 4.1%)                   |
| Restricted mean event-free time                                        | 4.27 years | 4.46 years | -70.5 days (-100.7 days to -40.2 days) |
|                                                                        |            |            |                                        |

<sup>1</sup>Defined as the per-person average time spent event-free over the time period between randomization and 5 years. This average is close to 5 years because most patients do not experience outcome events in that timeframe.

<sup>2</sup>Diagnosis of non-procedural MI was defined as Type 1, 2, 4b, or 4c myocardial infarction. See Definitions of Outcomes in Supplementary Methods.

INV denotes invasive strategy; CON denotes conservative strategy; CV denotes cardiovascular; MI denotes myocardial infarction; HR denotes hazard ratio; CI denotes confidence interval

Tables S12a-S12f. Bayesian Probability Tables

PRIMARY OUTCOME

S12a. Prior #1 (Primary analysis): Diffuse independent normal prior on regression coefficients

| Years | Cumulative Incidence By Treatment Group (95% CrI) |       |                         | Bayesian Probability of Difference ( $\Delta$ ) Between Cumulative Incidence Rates |                       |                       |                         |                      |                      |
|-------|---------------------------------------------------|-------|-------------------------|------------------------------------------------------------------------------------|-----------------------|-----------------------|-------------------------|----------------------|----------------------|
|       |                                                   |       |                         | Difference Favoring INV                                                            |                       |                       | Difference Favoring CON |                      |                      |
|       | INV                                               | CON   | Difference ( $\Delta$ ) | Pr( $\Delta < 0\%$ )                                                               | Pr( $\Delta < -1\%$ ) | Pr( $\Delta < -3\%$ ) | Pr( $\Delta > 0\%$ )    | Pr( $\Delta > 1\%$ ) | Pr( $\Delta > 3\%$ ) |
| 1     | 7.0%                                              | 5.4%  | 1.5% (0.2% - 2.9%)      | 1.1%                                                                               | <0.1%                 | <0.1%                 | 98.9%                   | 78.7%                | 1.5%                 |
| 2     | 9.0%                                              | 9.5%  | -0.5% (-2.1% - 1.1%)    | 71.9%                                                                              | 25.9%                 | 0.1%                  | 28.1%                   | 3.5%                 | <0.1%                |
| 3     | 11.3%                                             | 12.7% | -1.4% (-3.3% - 0.5%)    | 92.2%                                                                              | 65.0%                 | 4.5%                  | 7.8%                    | 0.7%                 | <0.1%                |
| 4     | 13.4%                                             | 15.4% | -2.1% (-4.3% - 0.1%)    | 96.7%                                                                              | 82.9%                 | 20.6%                 | 3.3%                    | 0.3%                 | <0.1%                |
| 5     | 16.3%                                             | 18.3% | -2.0% (-4.9% - 0.9%)    | 91.4%                                                                              | 75.4%                 | 24.5%                 | 8.6%                    | 2.0%                 | <0.1%                |

S12b. Prior #2: (Sensitivity analysis) Autoregressive normal AR(1) prior on regression coefficients

| Years | Cumulative Incidence By Treatment Group (95% CrI) |       |                         | Bayesian Probability of Difference ( $\Delta$ ) Between Cumulative Incidence Rates |                       |                       |                         |                      |                      |
|-------|---------------------------------------------------|-------|-------------------------|------------------------------------------------------------------------------------|-----------------------|-----------------------|-------------------------|----------------------|----------------------|
|       |                                                   |       |                         | Difference Favoring INV                                                            |                       |                       | Difference Favoring CON |                      |                      |
|       | INV                                               | CON   | Difference ( $\Delta$ ) | Pr( $\Delta < 0\%$ )                                                               | Pr( $\Delta < -1\%$ ) | Pr( $\Delta < -3\%$ ) | Pr( $\Delta > 0\%$ )    | Pr( $\Delta > 1\%$ ) | Pr( $\Delta > 3\%$ ) |
| 1     | 6.9%                                              | 5.5%  | 1.4% (0.1% - 2.7%)      | 1.5%                                                                               | <0.1%%                | <0.1%%                | 98.5%                   | 74.3%                | 0.9%                 |
| 2     | 9.1%                                              | 9.4%  | -0.4% (-1.9% - 1.2%)    | 67.4%                                                                              | 21.5%                 | 0.1%                  | 32.6%                   | 4.4%                 | <0.1%%               |
| 3     | 11.3%                                             | 12.7% | -1.3% (-3.2% - 0.5%)    | 92.3%                                                                              | 64.0%                 | 4.1%                  | 7.7%                    | 0.7%                 | <0.1%%               |
| 4     | 13.4%                                             | 15.4% | -2.0% (-4.2% - 0.1%)    | 96.9%                                                                              | 82.9%                 | 19.2%                 | 3.1%                    | 0.3%                 | <0.1%%               |
| 5     | 16.3%                                             | 18.3% | -2.0% (-4.8% - 0.7%)    | 92.6%                                                                              | 76.8%                 | 24.0%                 | 7.4%                    | 1.5%                 | <0.1%%               |

CrI = Credible interval

$\Delta$  = Difference in cumulative event rates

$\Delta < 0\%$  denotes the hypothesis that the difference favors INV by any amount

$\Delta < -1\%$  denotes the hypothesis that the difference favors INV by at least 1 percentage point

$\Delta < -3\%$  denotes the hypothesis that the difference favors INV by at least 3 percentage points

$\Delta > 0\%$  denotes the hypothesis that the difference favors CON by any amount

$\Delta > 1\%$  denotes the hypothesis that the difference favors CON by at least 1 percentage point

$\Delta > 3\%$  denotes the hypothesis that the difference favors CON by at least 3 percentage points

CV DEATH OR MI

S12c. Prior #1 (Primary analysis): Diffuse independent normal prior on regression coefficients

| Years | Cumulative Incidence By Treatment Group (95% CrI) |       |                         | Bayesian Probability of Difference ( $\Delta$ ) Between Cumulative Incidence Rates |                       |                       |                         |                      |                      |
|-------|---------------------------------------------------|-------|-------------------------|------------------------------------------------------------------------------------|-----------------------|-----------------------|-------------------------|----------------------|----------------------|
|       |                                                   |       |                         | Difference Favoring INV                                                            |                       |                       | Difference Favoring CON |                      |                      |
|       | INV                                               | CON   | Difference ( $\Delta$ ) | Pr( $\Delta < 0\%$ )                                                               | Pr( $\Delta < -1\%$ ) | Pr( $\Delta < -3\%$ ) | Pr( $\Delta > 0\%$ )    | Pr( $\Delta > 1\%$ ) | Pr( $\Delta > 3\%$ ) |
| 1     | 6.2%                                              | 4.6%  | 1.6% (0.4% - 2.8%)      | 0.5%                                                                               | <0.1%                 | <0.1%                 | 99.5%                   | 83.5%                | 1.3%                 |
| 2     | 7.9%                                              | 8.2%  | -0.3% (-1.8% - 1.2%)    | 66.3%                                                                              | 18.7%                 | <0.1%                 | 33.7%                   | 4.1%                 | <0.1%                |
| 3     | 9.7%                                              | 11.0% | -1.3% (-3.1% - 0.5%)    | 92.6%                                                                              | 63.2%                 | 3.1%                  | 7.4%                    | 0.5%                 | <0.1%                |
| 4     | 11.8%                                             | 13.8% | -2.1% (-4.2% - 0.1%)    | 97.2%                                                                              | 83.7%                 | 19.2%                 | 2.8%                    | 0.2%                 | <0.1%                |
| 5     | 14.2%                                             | 16.7% | -2.5% (-5.3% - 0.2%)    | 96.4%                                                                              | 86.0%                 | 36.3%                 | 3.6%                    | 0.6%                 | <0.1%                |

S12d. Prior #2: (Sensitivity analysis) Autoregressive normal AR(1) prior on regression coefficients

| Years | Cumulative Incidence By Treatment Group (95% CrI) |       |                         | Bayesian Probability of Difference ( $\Delta$ ) Between Cumulative Incidence Rates |                       |                       |                         |                      |                      |
|-------|---------------------------------------------------|-------|-------------------------|------------------------------------------------------------------------------------|-----------------------|-----------------------|-------------------------|----------------------|----------------------|
|       |                                                   |       |                         | Difference Favoring INV                                                            |                       |                       | Difference Favoring CON |                      |                      |
|       | INV                                               | CON   | Difference ( $\Delta$ ) | Pr( $\Delta < 0\%$ )                                                               | Pr( $\Delta < -1\%$ ) | Pr( $\Delta < -3\%$ ) | Pr( $\Delta > 0\%$ )    | Pr( $\Delta > 1\%$ ) | Pr( $\Delta > 3\%$ ) |
| 1     | 6.1%                                              | 4.6%  | 1.5% (0.3% - 2.7%)      | 0.8%                                                                               | <0.1%%                | <0.1%%                | 99.2%                   | 78.7%                | 0.8%                 |
| 2     | 7.9%                                              | 8.1%  | -0.2% (-1.7% - 1.2%)    | 61.8%                                                                              | 15.5%                 | <0.1%%                | 38.2%                   | 5.2%                 | <0.1%%               |
| 3     | 9.7%                                              | 11.0% | -1.3% (-3.0% - 0.5%)    | 92.2%                                                                              | 61.5%                 | 2.5%                  | 7.8%                    | 0.6%                 | <0.1%%               |
| 4     | 11.8%                                             | 13.8% | -2.1% (-4.1% - 0.0%)    | 97.5%                                                                              | 84.4%                 | 18.6%                 | 2.5%                    | 0.2%                 | <0.1%%               |
| 5     | 14.1%                                             | 16.7% | -2.6% (-5.2% - 0.0%)    | 97.4%                                                                              | 88.4%                 | 38.3%                 | 2.6%                    | 0.4%                 | <0.1%%               |

CrI = Credible interval

$\Delta$  = Difference in cumulative event rates

$\Delta < 0\%$  denotes the hypothesis that the difference favors INV by any amount

$\Delta < -1\%$  denotes the hypothesis that the difference favors INV by at least 1 percentage point

$\Delta < -3\%$  denotes the hypothesis that the difference favors INV by at least 3 percentage points

$\Delta > 0\%$  denotes the hypothesis that the difference favors CON by any amount

$\Delta > 1\%$  denotes the hypothesis that the difference favors CON by at least 1 percentage point

$\Delta > 3\%$  denotes the hypothesis that the difference favors CON by at least 3 percentage points

ALL-CAUSE DEATH

S12e. Prior #1 (Primary analysis): Diffuse independent normal prior on regression coefficients

| Years | Cumulative Incidence By Treatment Group (95% CrI) |      |                         | Bayesian Probability of Difference ( $\Delta$ ) Between Cumulative Incidence Rates |                       |                       |                         |                      |                      |
|-------|---------------------------------------------------|------|-------------------------|------------------------------------------------------------------------------------|-----------------------|-----------------------|-------------------------|----------------------|----------------------|
|       |                                                   |      |                         | Difference Favoring INV                                                            |                       |                       | Difference Favoring CON |                      |                      |
|       | INV                                               | CON  | Difference ( $\Delta$ ) | Pr( $\Delta < 0\%$ )                                                               | Pr( $\Delta < -1\%$ ) | Pr( $\Delta < -3\%$ ) | Pr( $\Delta > 0\%$ )    | Pr( $\Delta > 1\%$ ) | Pr( $\Delta > 3\%$ ) |
| 1     | 1.7%                                              | 1.0% | 0.7% (0.0% - 1.3%)      | 1.9%                                                                               | <0.1%                 | <0.1%                 | 98.1%                   | 14.9%                | <0.1%                |
| 2     | 2.8%                                              | 2.9% | -0.1% (-1.0% - 0.9%)    | 55.8%                                                                              | 2.5%                  | <0.1%                 | 44.2%                   | 1.3%                 | <0.1%                |
| 3     | 4.3%                                              | 4.3% | 0.1% (-1.1% - 1.3%)     | 46.5%                                                                              | 4.3%                  | <0.1%                 | 53.5%                   | 6.0%                 | <0.1%                |
| 4     | 6.6%                                              | 6.4% | 0.2% (-1.4% - 1.9%)     | 40.0%                                                                              | 7.5%                  | <0.1%                 | 60.0%                   | 17.7%                | 0.1%                 |
| 5     | 8.9%                                              | 8.5% | 0.5% (-1.8% - 2.8%)     | 34.9%                                                                              | 10.7%                 | 0.2%                  | 65.1%                   | 32.1%                | 1.6%                 |

S12f. Prior #2: (Sensitivity analysis) Autoregressive normal AR(1) prior on regression coefficients

| Years | Cumulative Incidence By Treatment Group (95% CrI) |      |                         | Bayesian Probability of Difference ( $\Delta$ ) Between Cumulative Incidence Rates |                       |                       |                         |                      |                      |
|-------|---------------------------------------------------|------|-------------------------|------------------------------------------------------------------------------------|-----------------------|-----------------------|-------------------------|----------------------|----------------------|
|       |                                                   |      |                         | Difference Favoring INV                                                            |                       |                       | Difference Favoring CON |                      |                      |
|       | INV                                               | CON  | Difference ( $\Delta$ ) | Pr( $\Delta < 0\%$ )                                                               | Pr( $\Delta < -1\%$ ) | Pr( $\Delta < -3\%$ ) | Pr( $\Delta > 0\%$ )    | Pr( $\Delta > 1\%$ ) | Pr( $\Delta > 3\%$ ) |
| 1     | 1.6%                                              | 1.1% | 0.5% (-0.1% - 1.1%)     | 4.4%                                                                               | <0.1%%                | <0.1%%                | 95.6%                   | 5.9%                 | <0.1%%               |
| 2     | 2.9%                                              | 2.9% | -0.0% (-0.9% - 0.9%)    | 51.7%                                                                              | 1.7%                  | <0.1%%                | 48.3%                   | 1.3%                 | <0.1%%               |
| 3     | 4.3%                                              | 4.3% | -0.0% (-1.2% - 1.1%)    | 53.1%                                                                              | 5.4%                  | <0.1%%                | 46.9%                   | 3.9%                 | <0.1%%               |
| 4     | 6.5%                                              | 6.4% | 0.1% (-1.5% - 1.7%)     | 43.1%                                                                              | 8.0%                  | <0.1%%                | 56.9%                   | 14.3%                | <0.1%%               |
| 5     | 8.9%                                              | 8.5% | 0.3% (-1.8% - 2.5%)     | 37.6%                                                                              | 11.3%                 | 0.1%                  | 62.4%                   | 27.8%                | 0.9%                 |

CrI = Credible interval

$\Delta$  = Difference in cumulative event rates

$\Delta < 0\%$  denotes the hypothesis that the difference favors INV by any amount

$\Delta < -1\%$  denotes the hypothesis that the difference favors INV by at least 1 percentage point

$\Delta < -3\%$  denotes the hypothesis that the difference favors INV by at least 3 percentage points

$\Delta > 0\%$  denotes the hypothesis that the difference favors CON by any amount

$\Delta > 1\%$  denotes the hypothesis that the difference favors CON by at least 1 percentage point

$\Delta > 3\%$  denotes the hypothesis that the difference favors CON by at least 3 percentage points
